# Supplementary material for: Genome-wide association study of primary tooth eruption identifies pleiotropic loci associated with height and craniofacial distances
Source: PubMed Central journal article supplement (PMC3749866; doi:10.1093/hmg/ddt231), 2013-05-23
Supplement: supp_ddt231_ddt231supp.pdf [file supp_ddt231_ddt231supp.pdf]

(A)

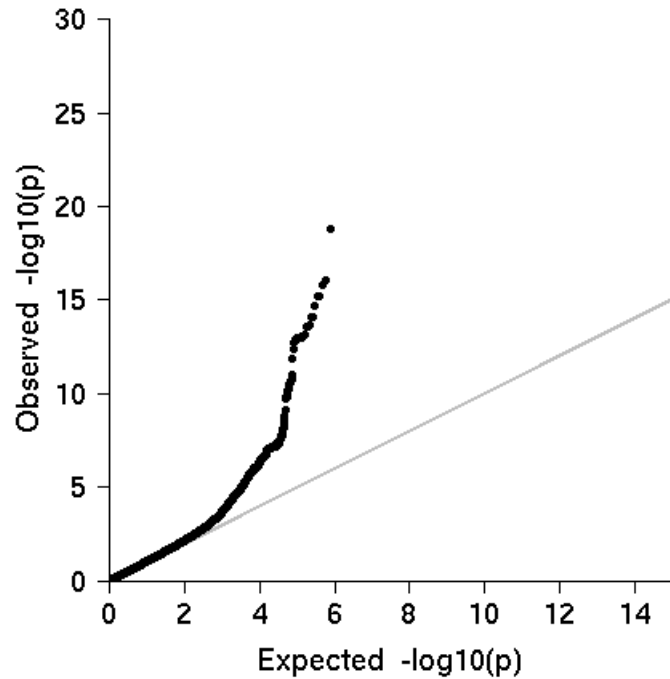

(B)

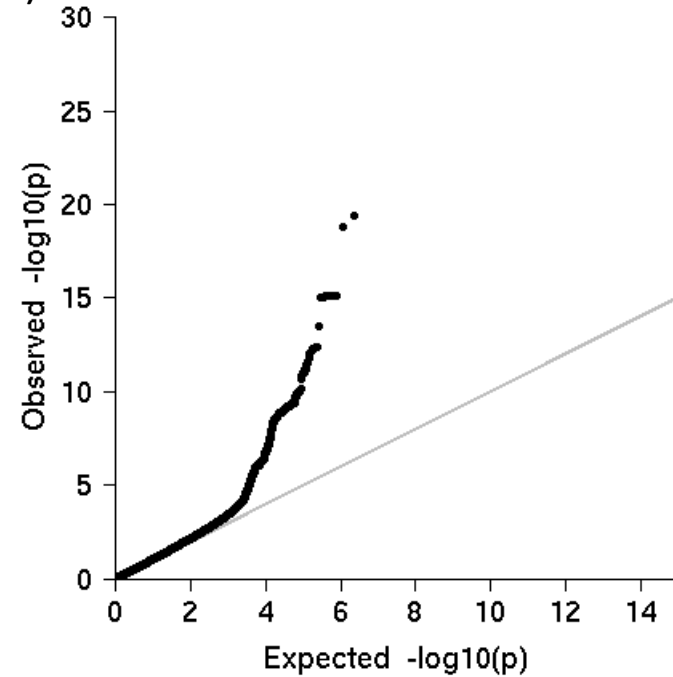

**Supplementary Figure 1:** QQ plot for the combined meta-analysis of (a) 'Age at first tooth' and (b) 'number of teeth' respectively. Both QQ plots show substantial deviation from the line of expectation for low p values only, suggesting the existence of common genetic variants influencing primary tooth eruption, but not substantial population stratification. The genomic inflation factors were  $\lambda = 1.07$  for 'age at first tooth', and  $\lambda = 1.06$  for 'number of teeth'.

(A)

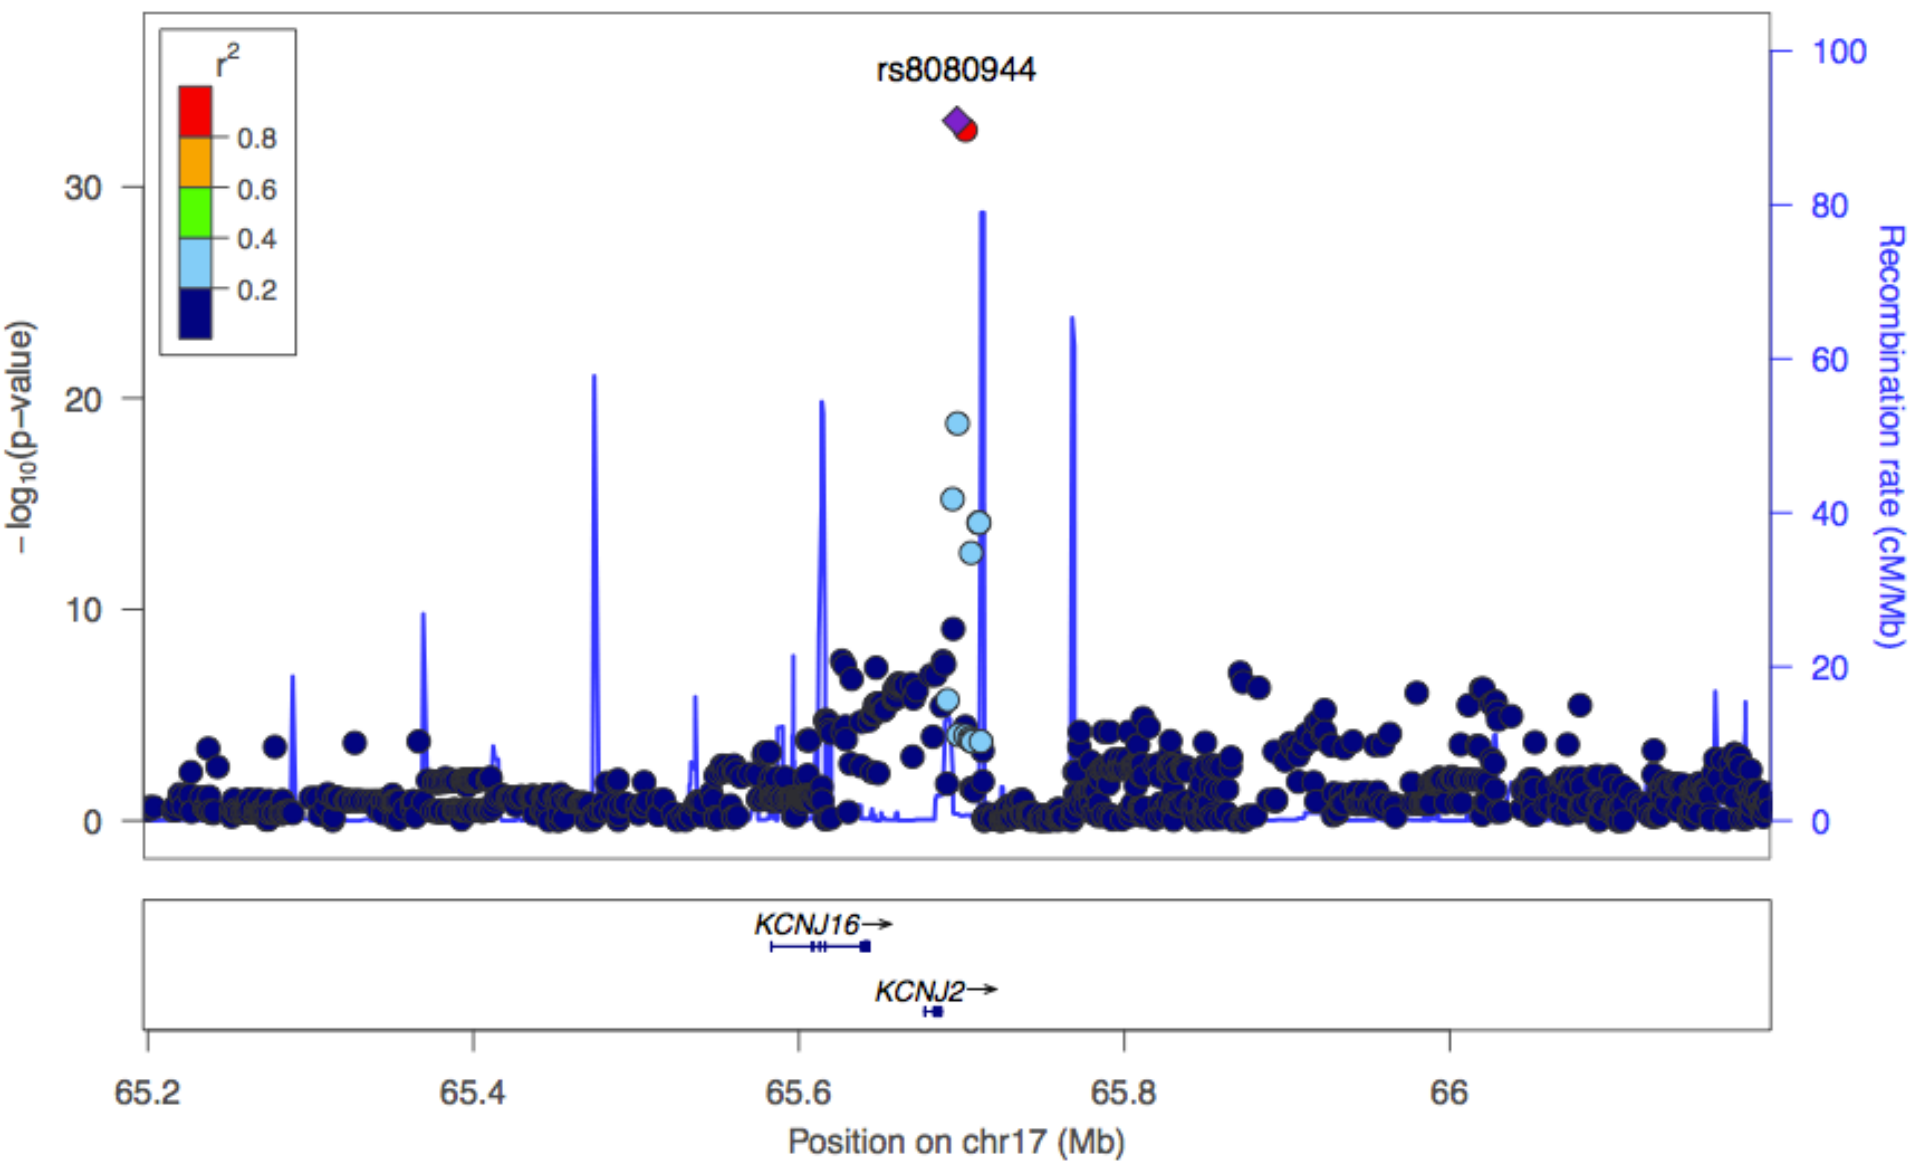

(B)

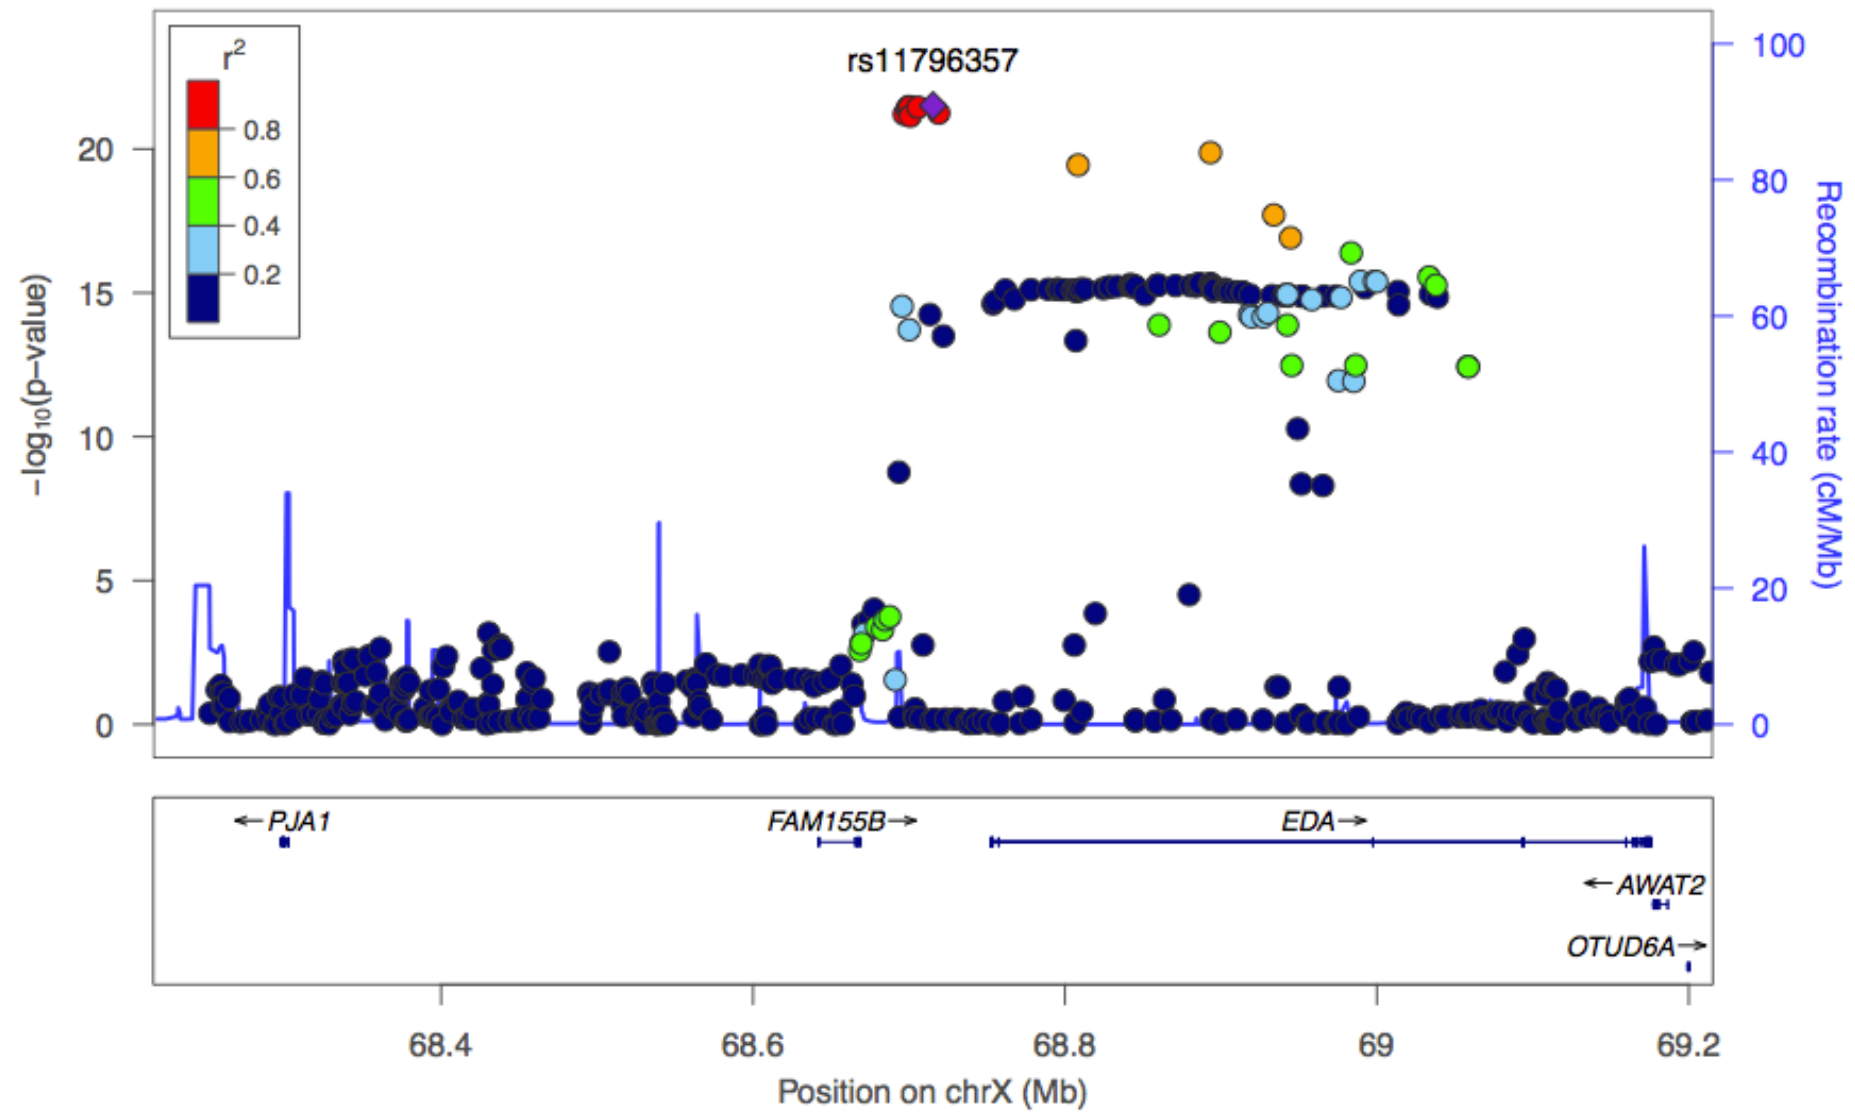

(C)

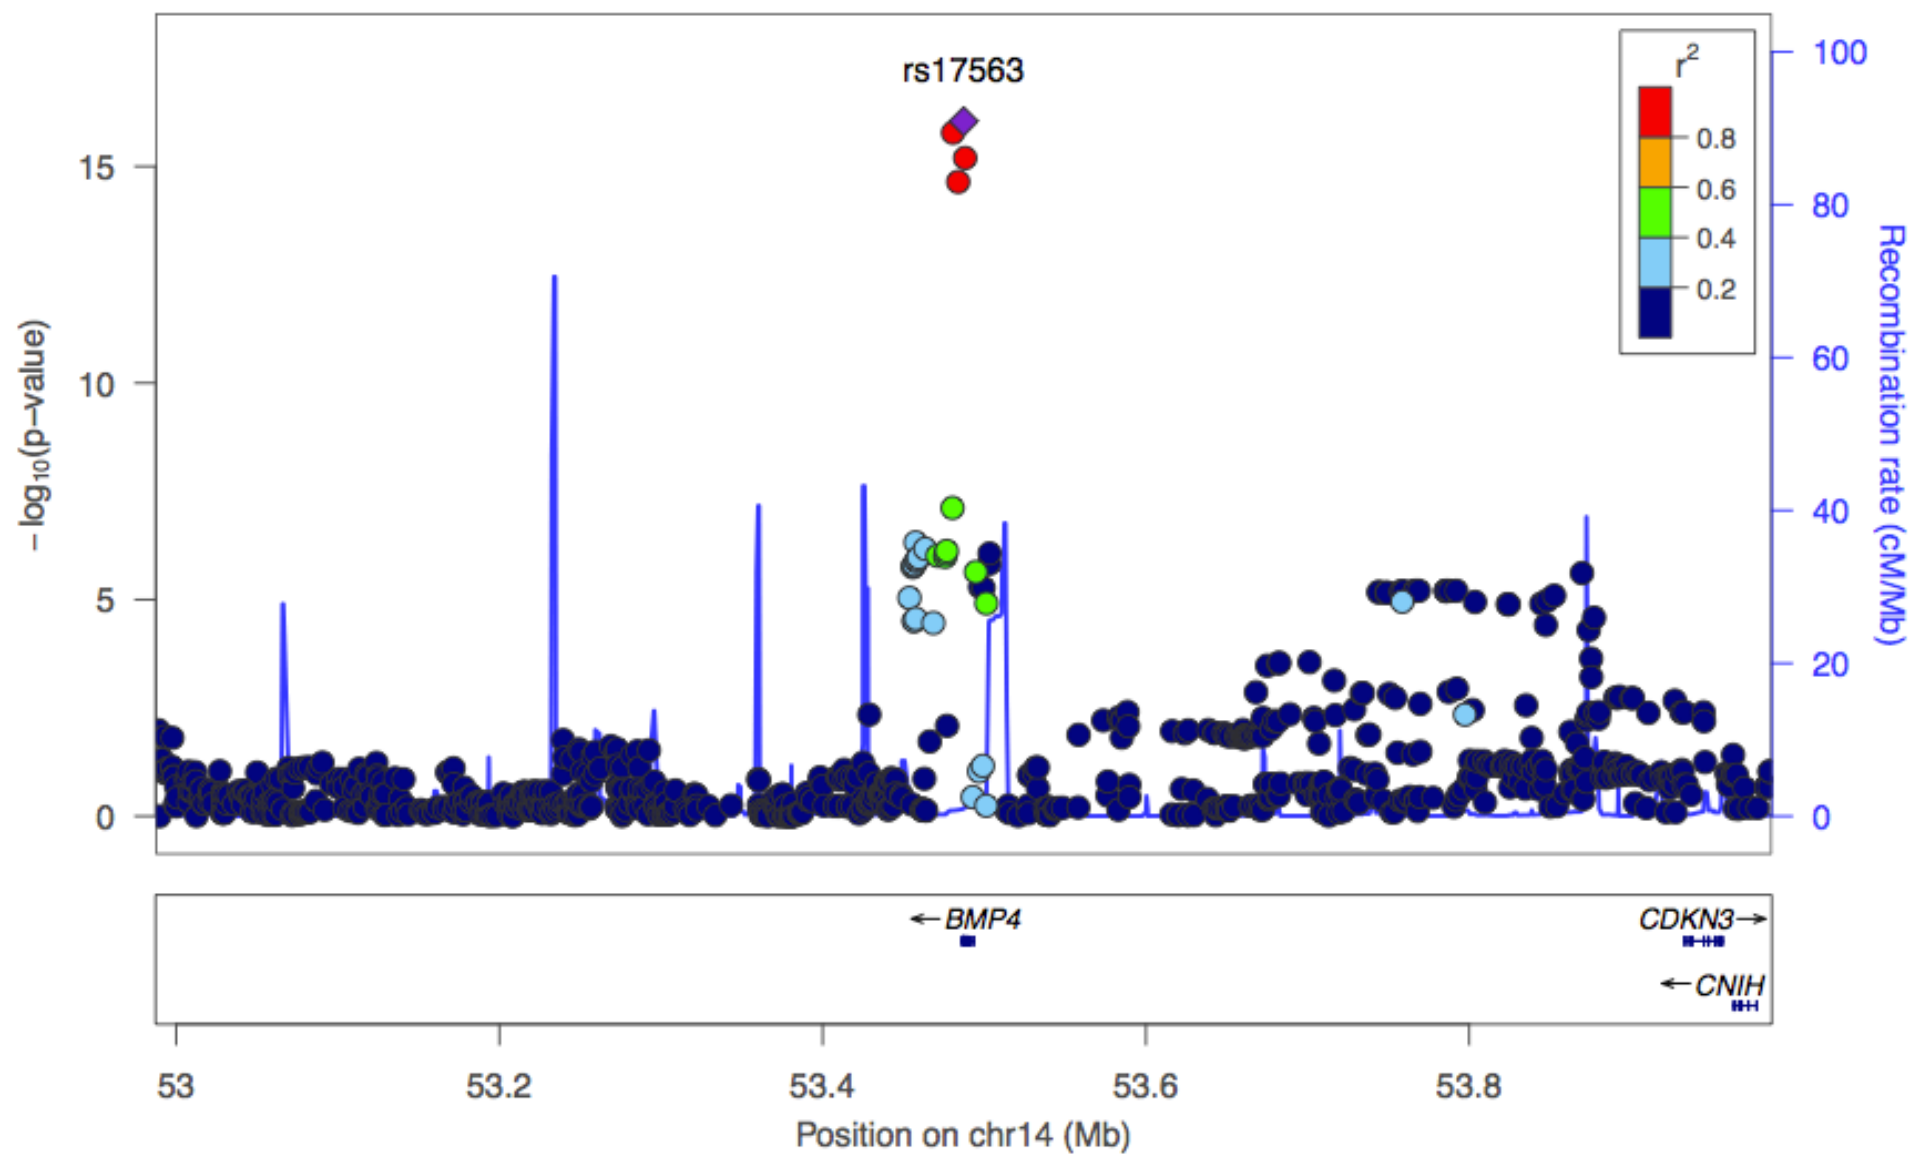

(D)

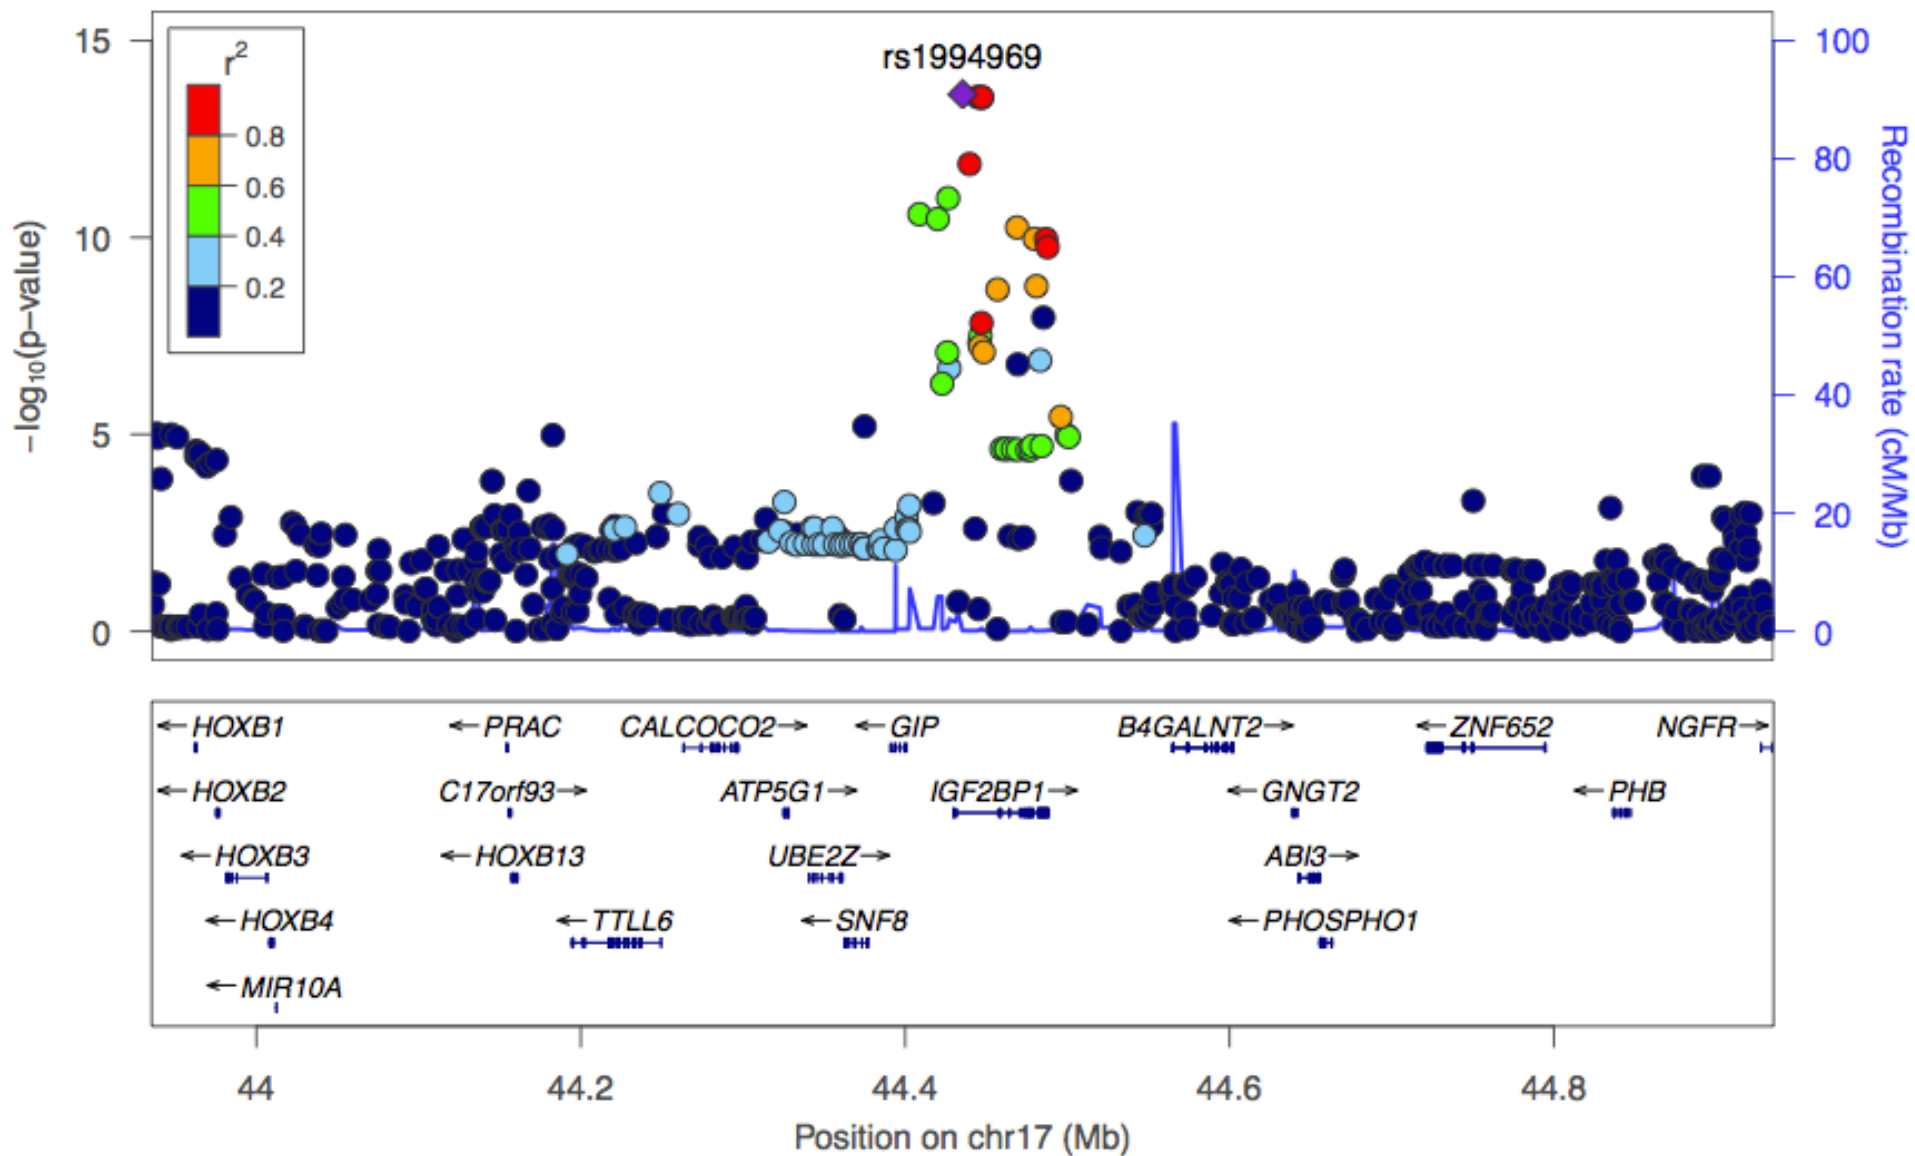

(E)

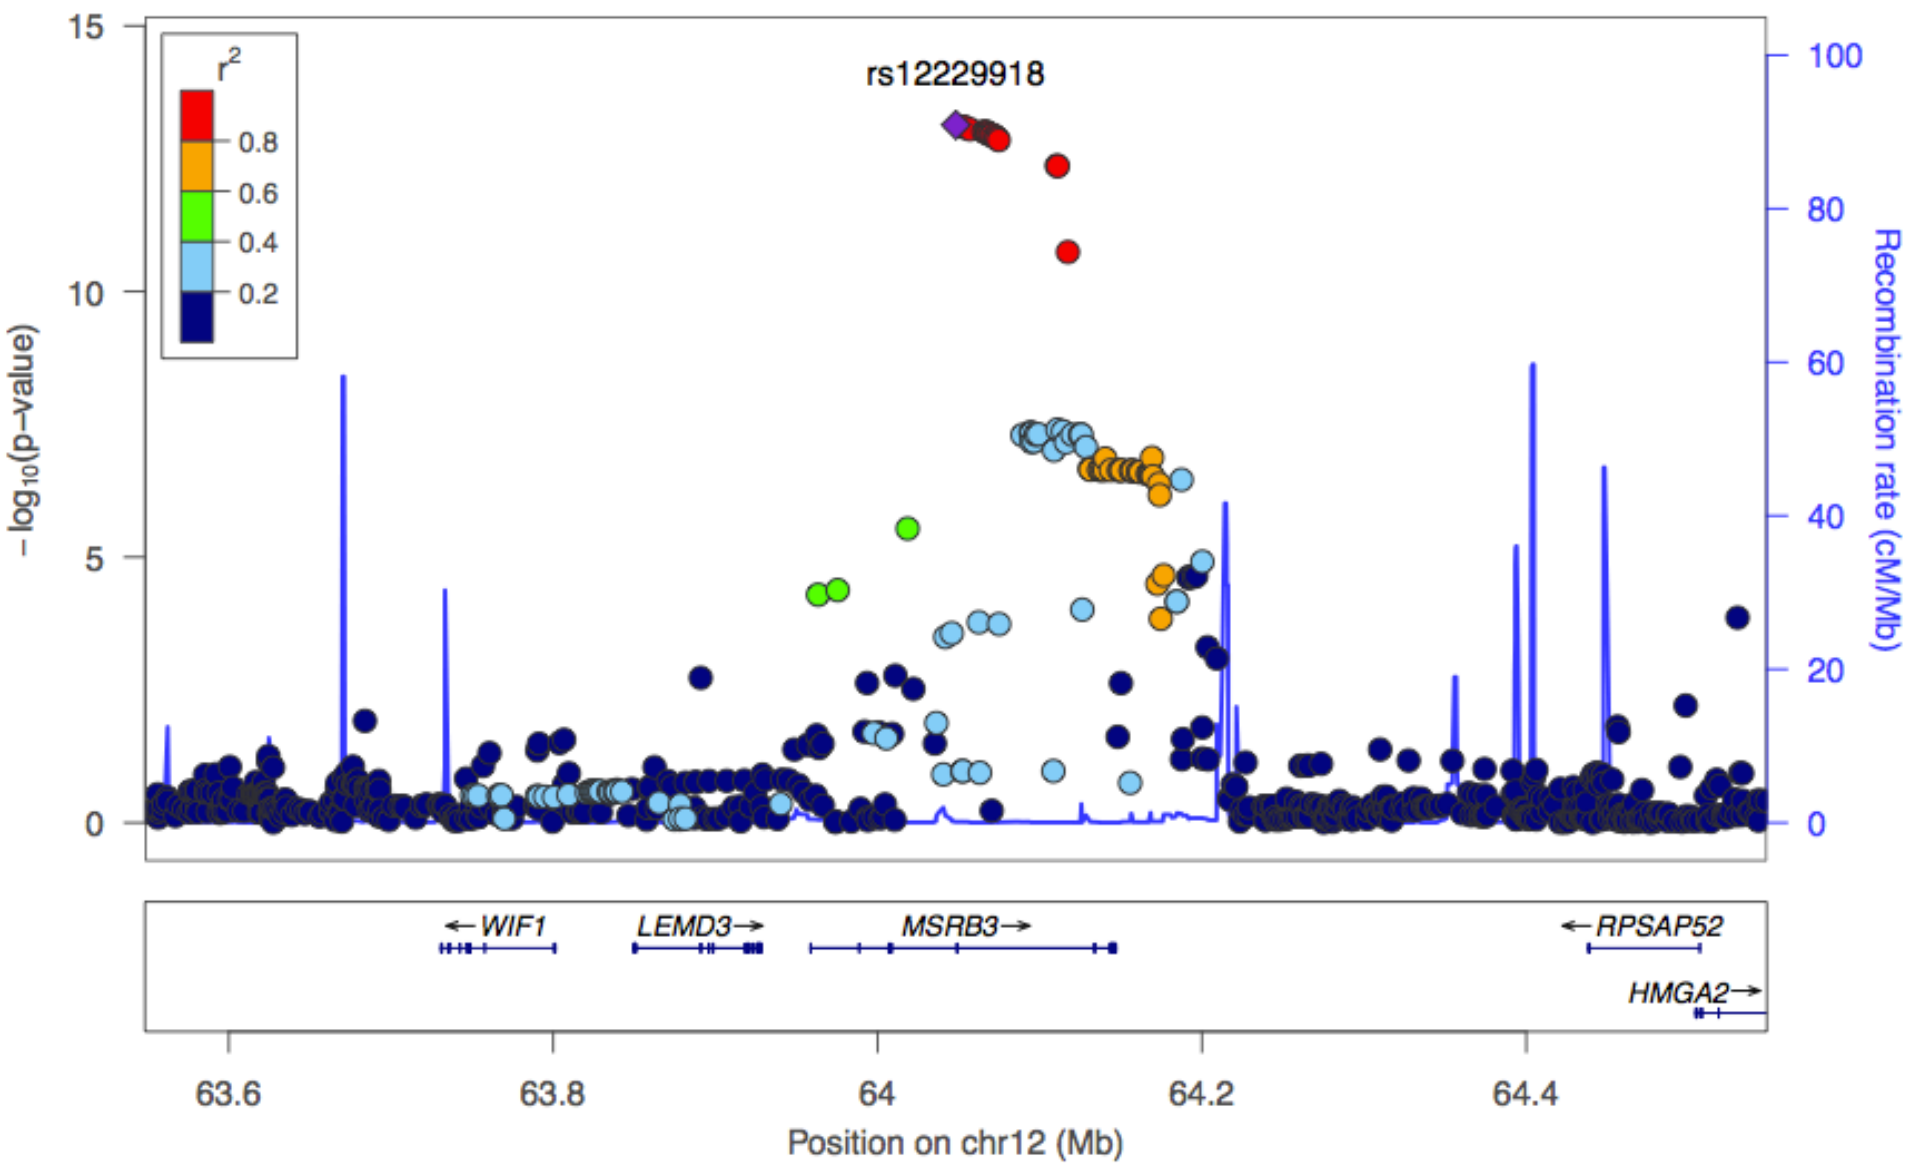

(F)

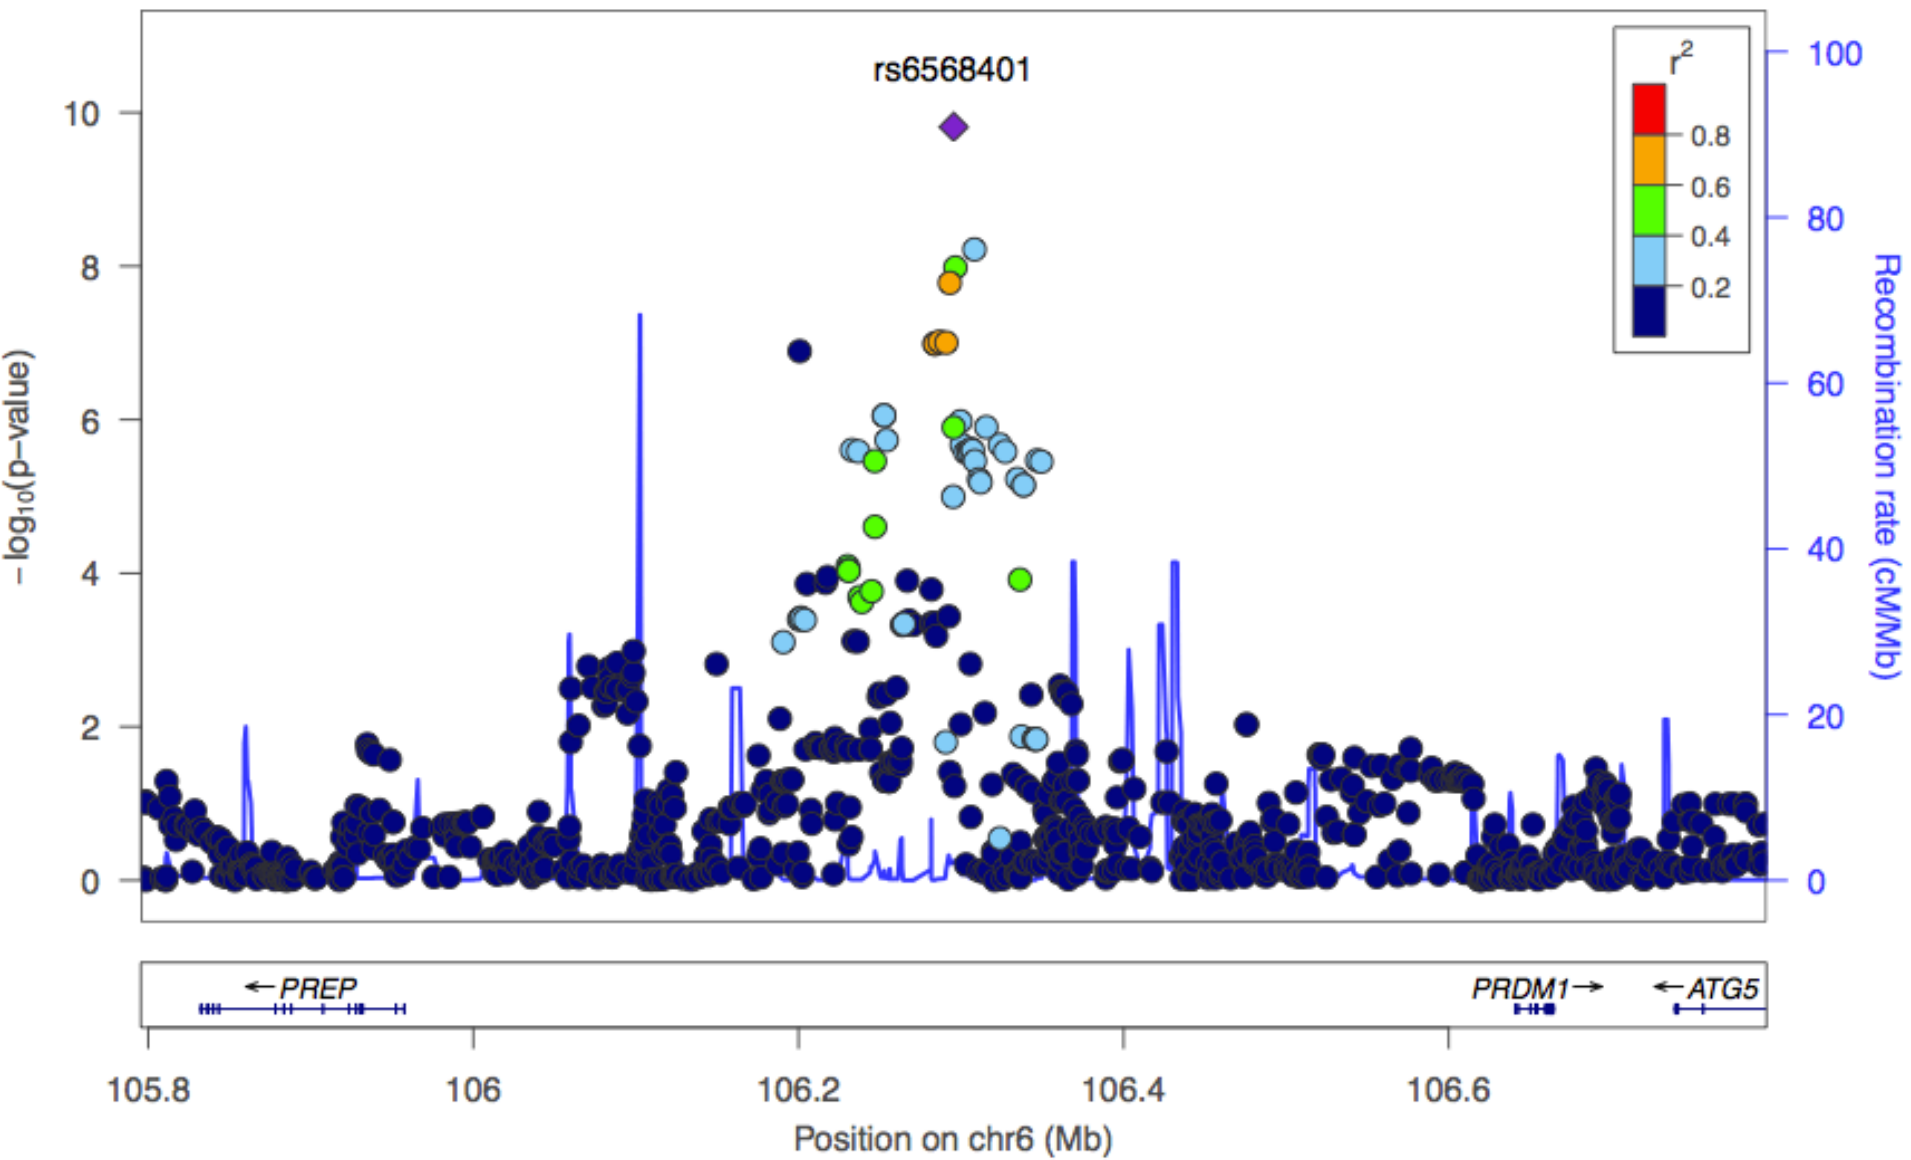

(G)

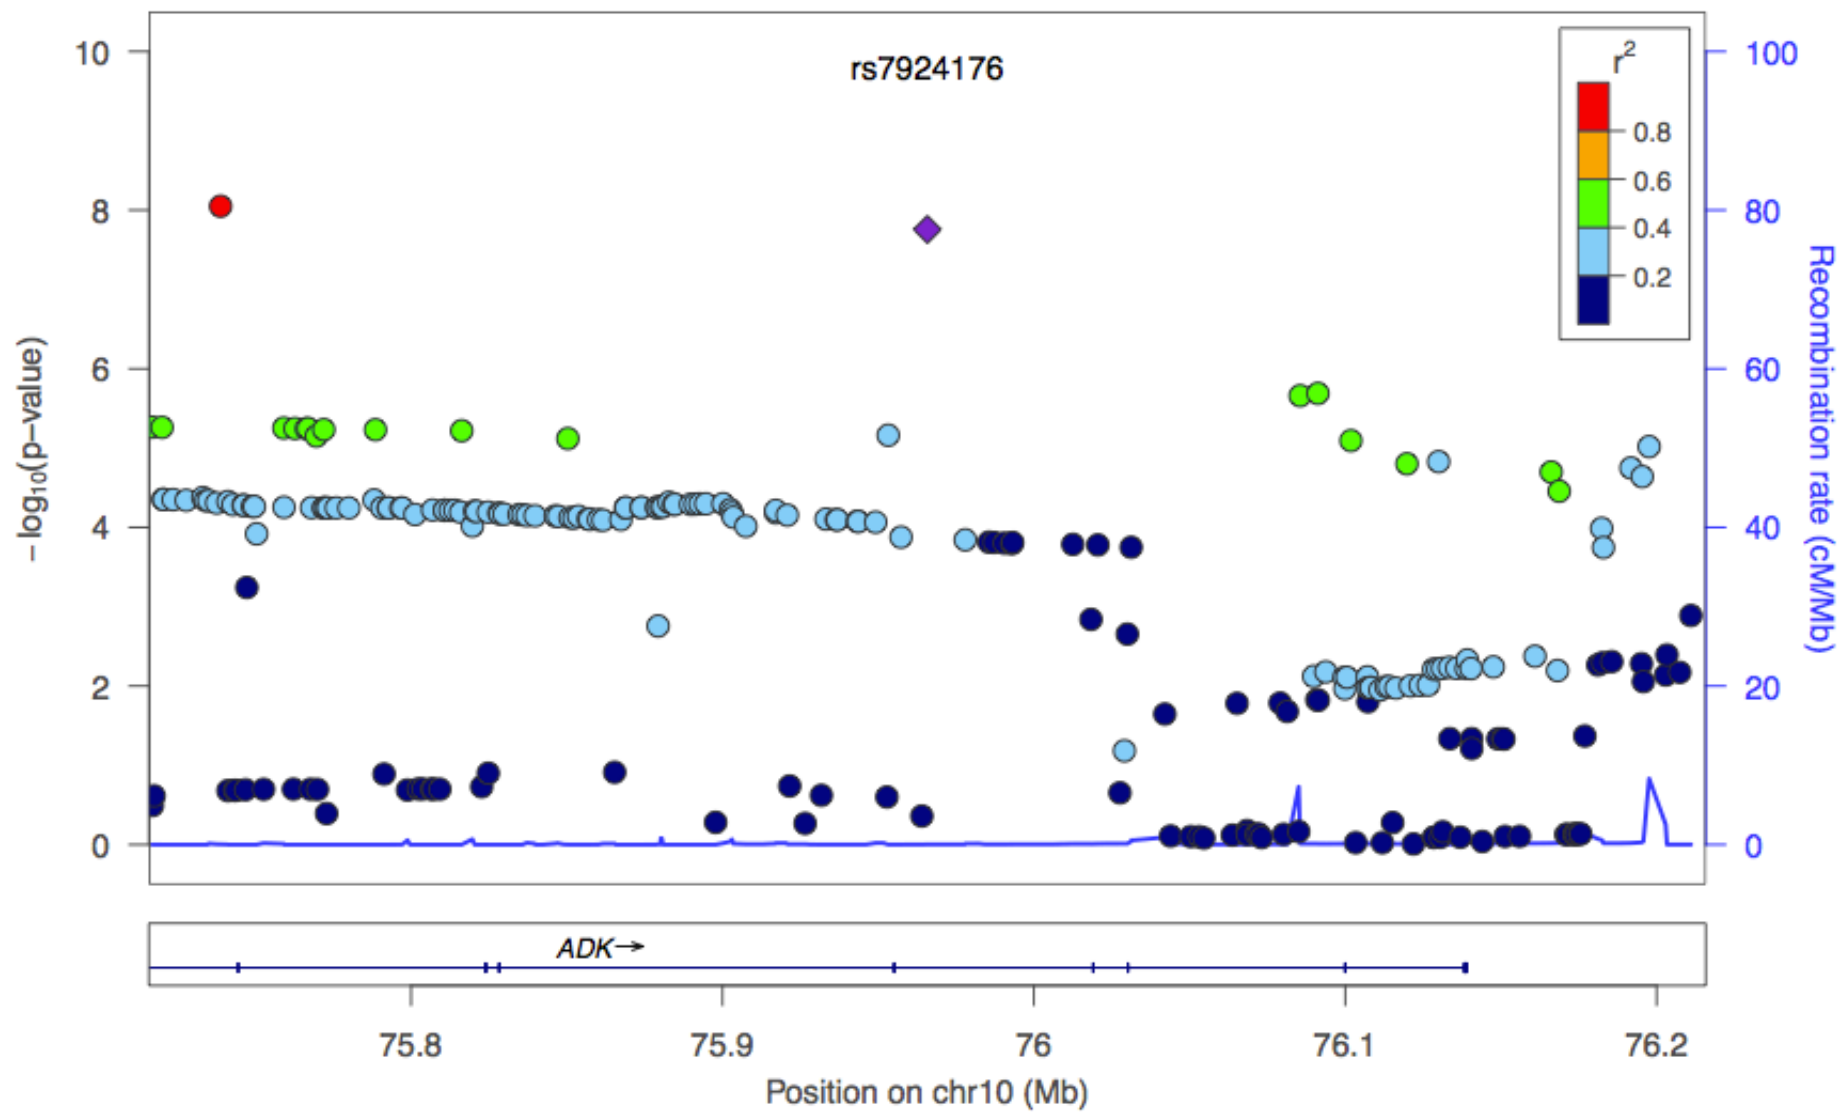



(H)

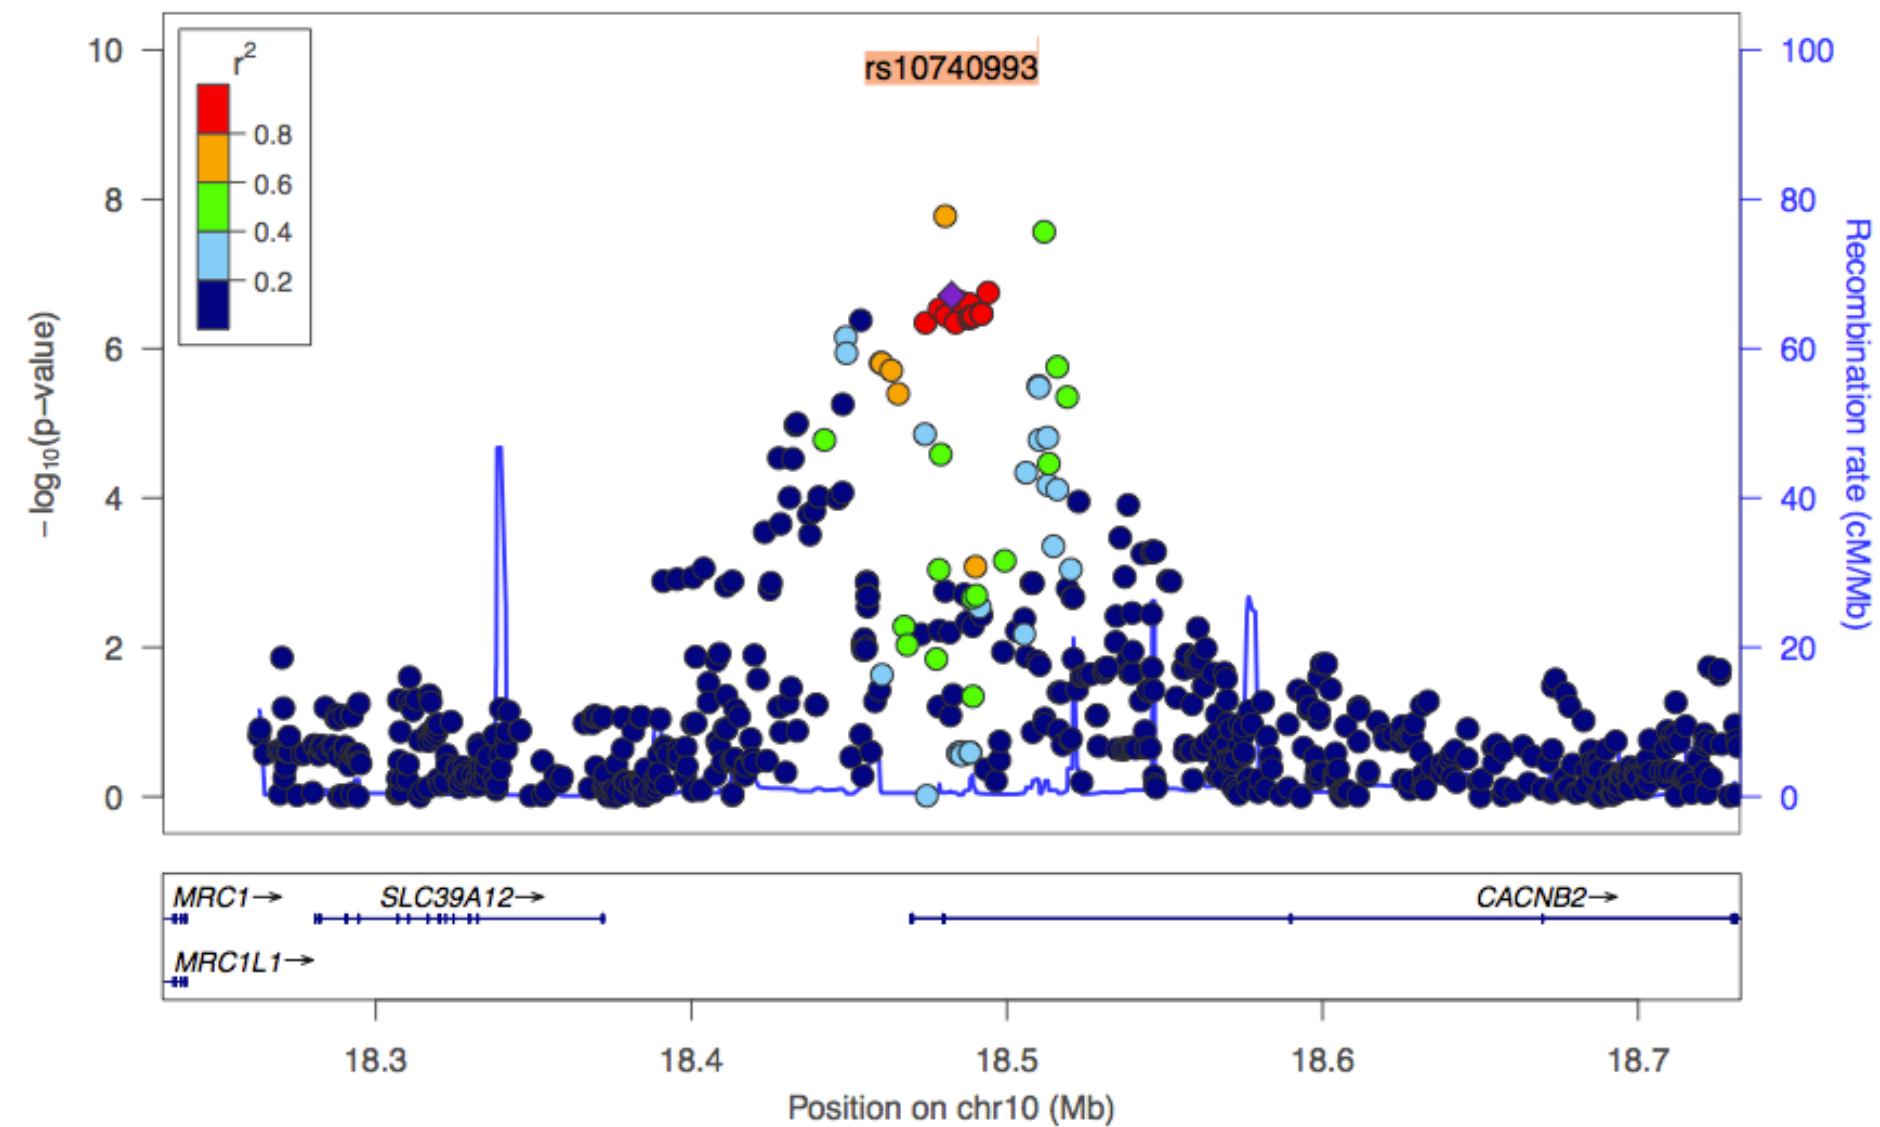

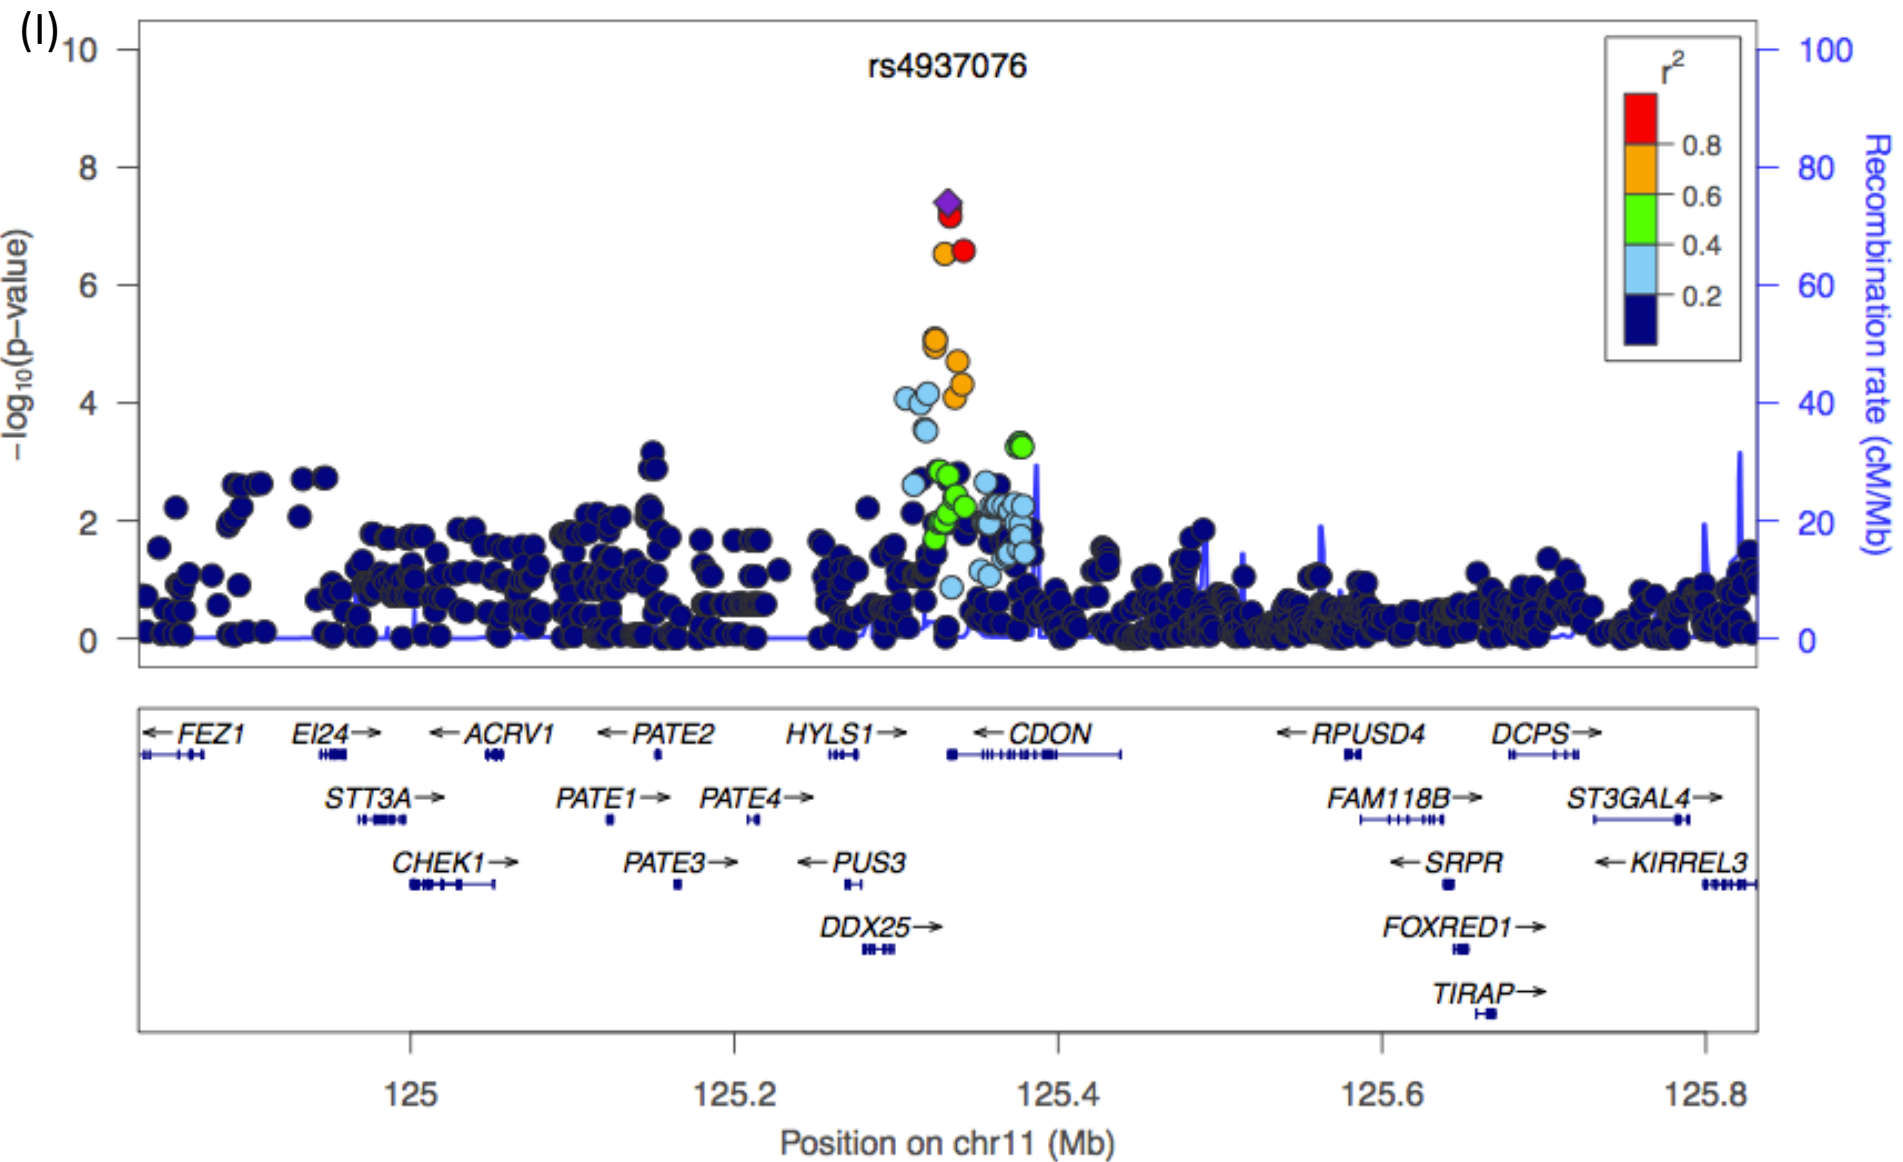

(J)

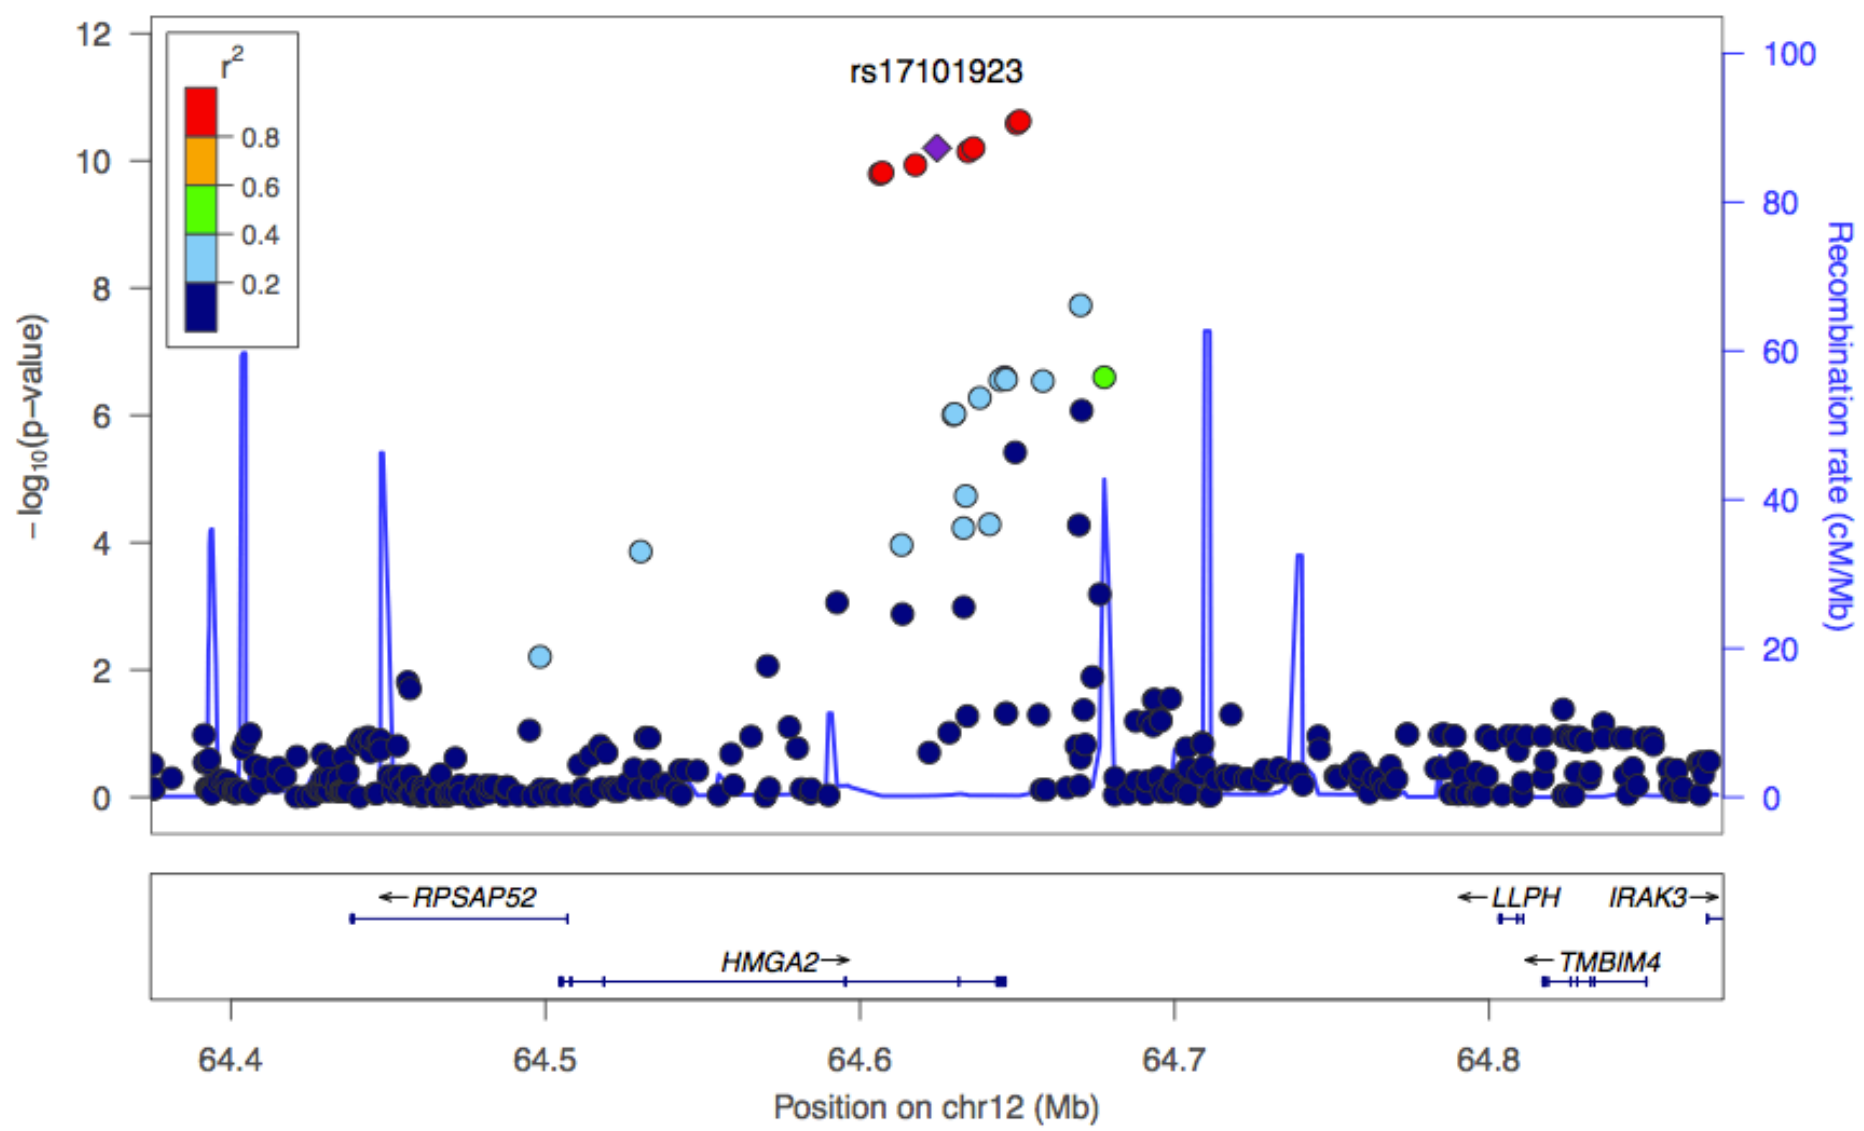

(K)

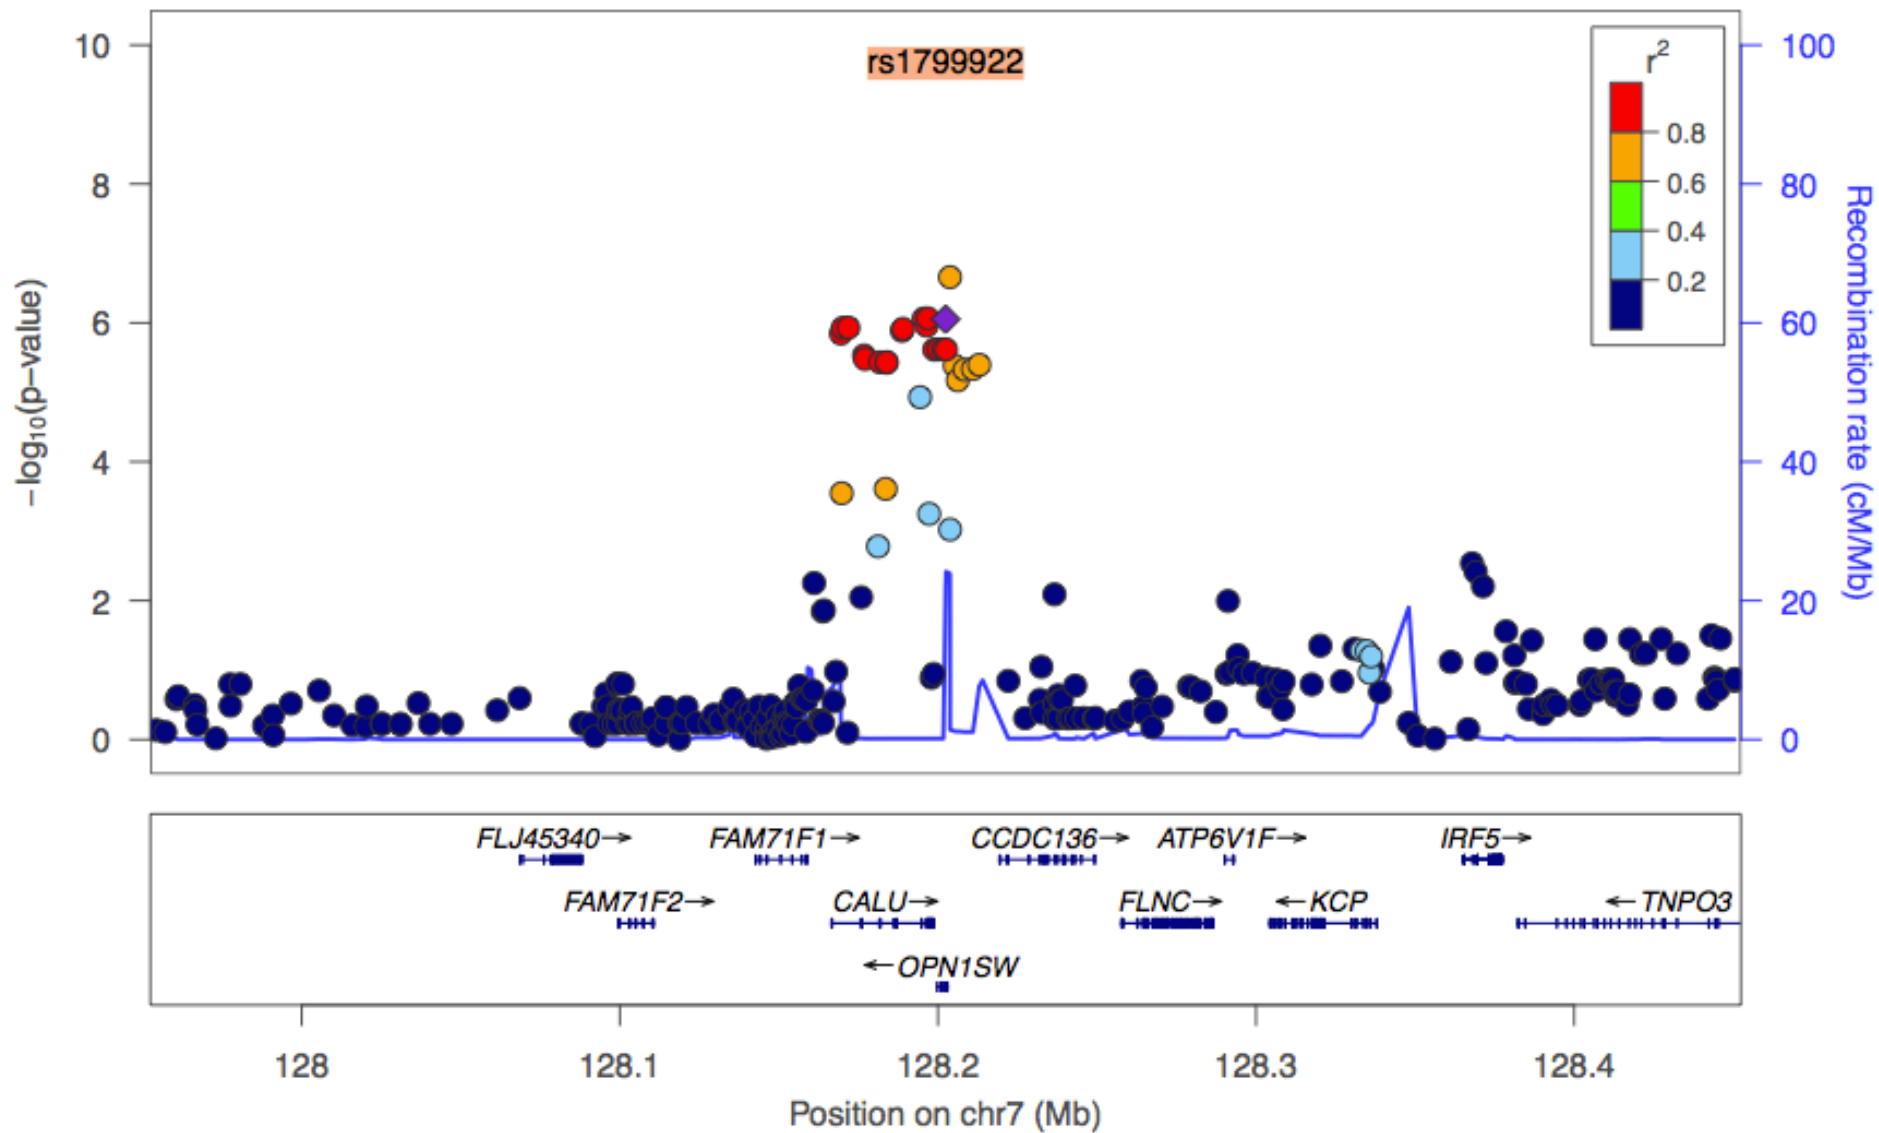

(L)

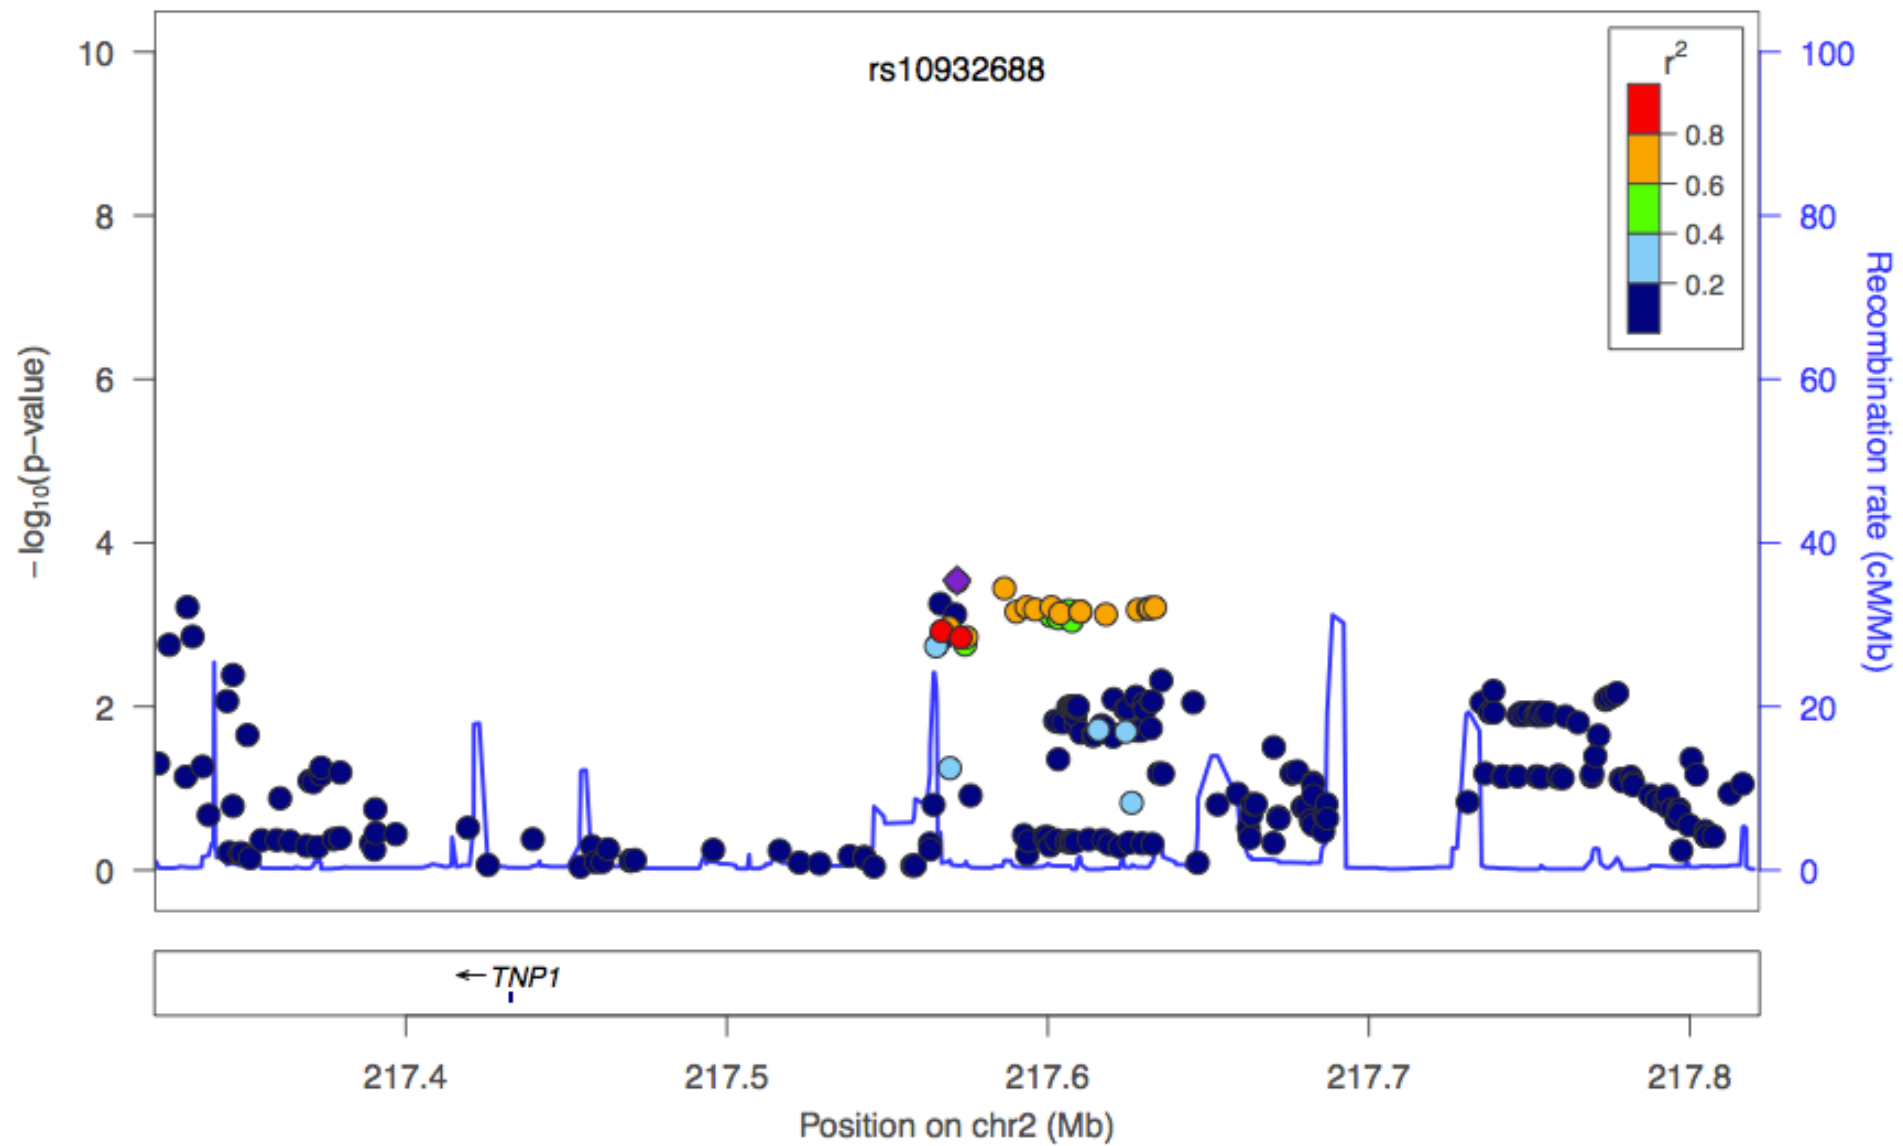

(M)

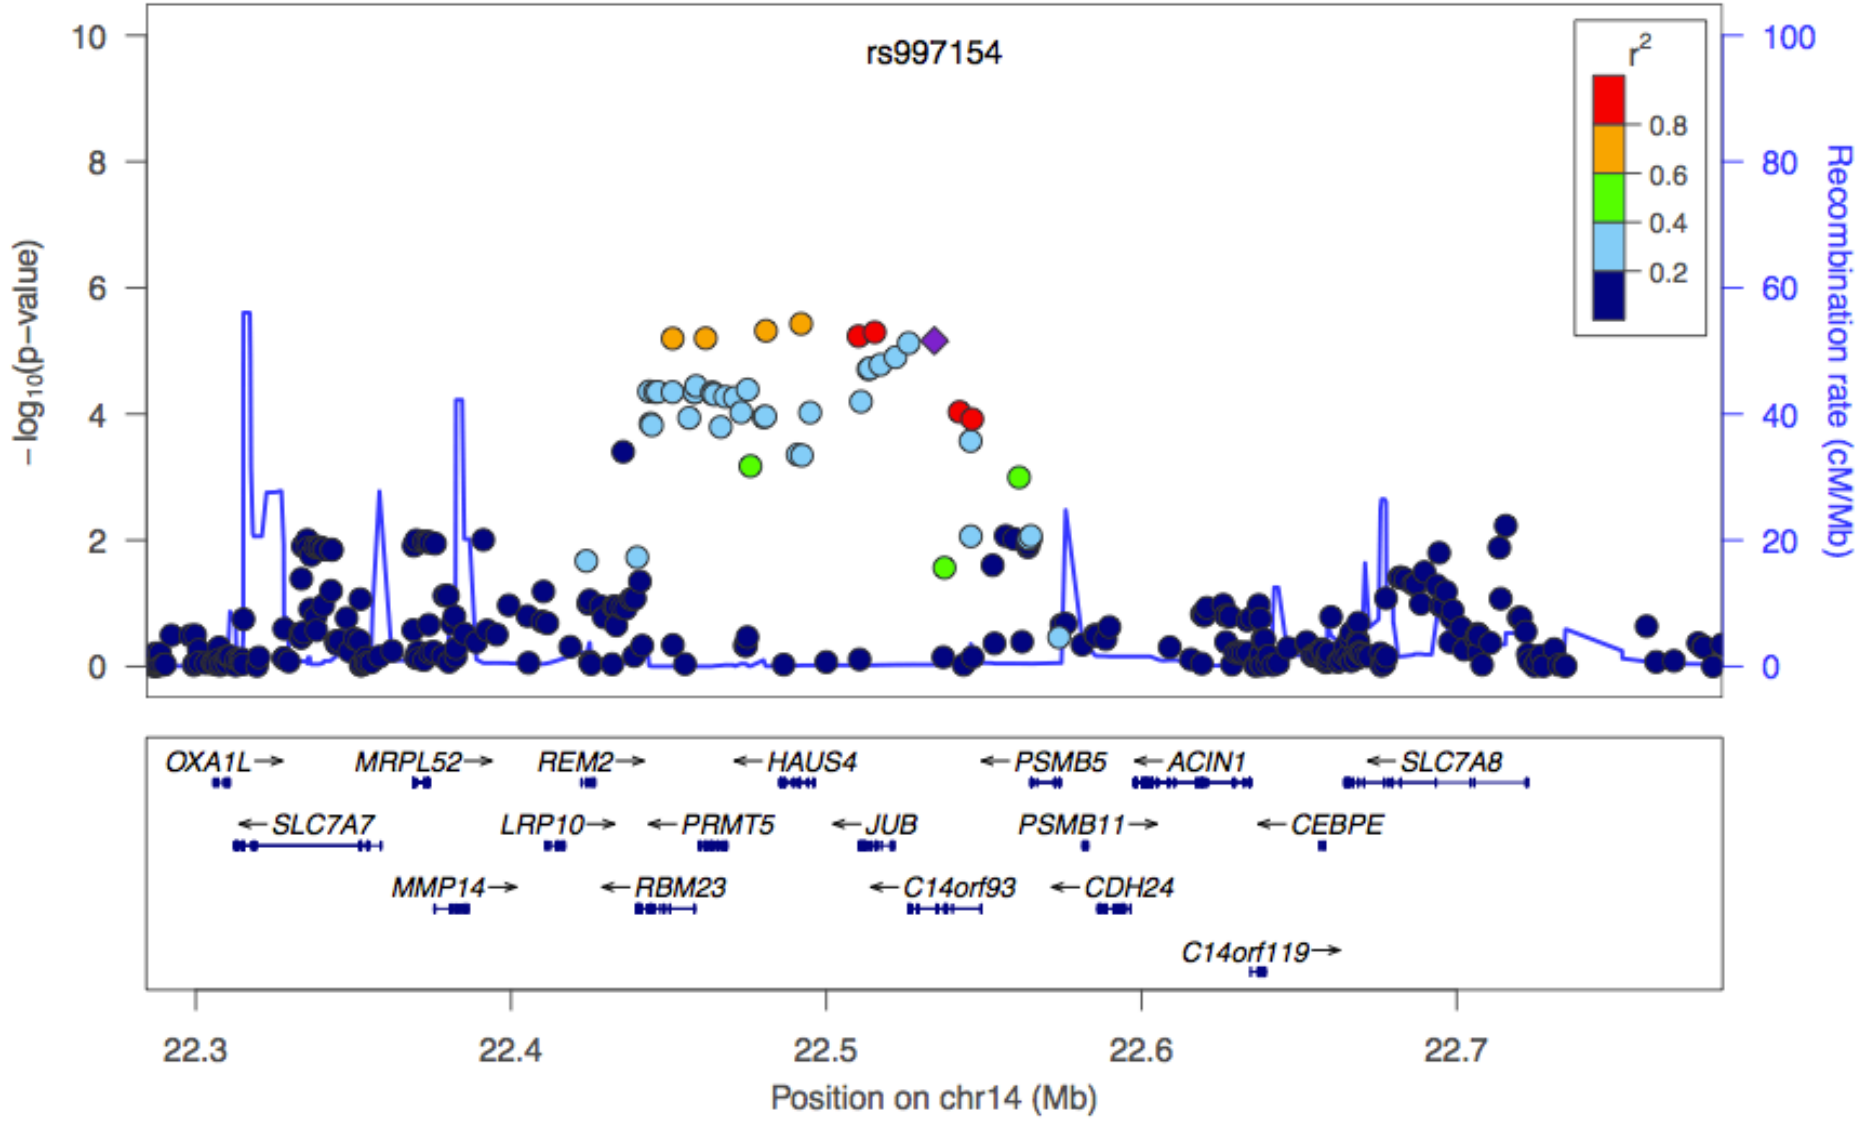

(N)

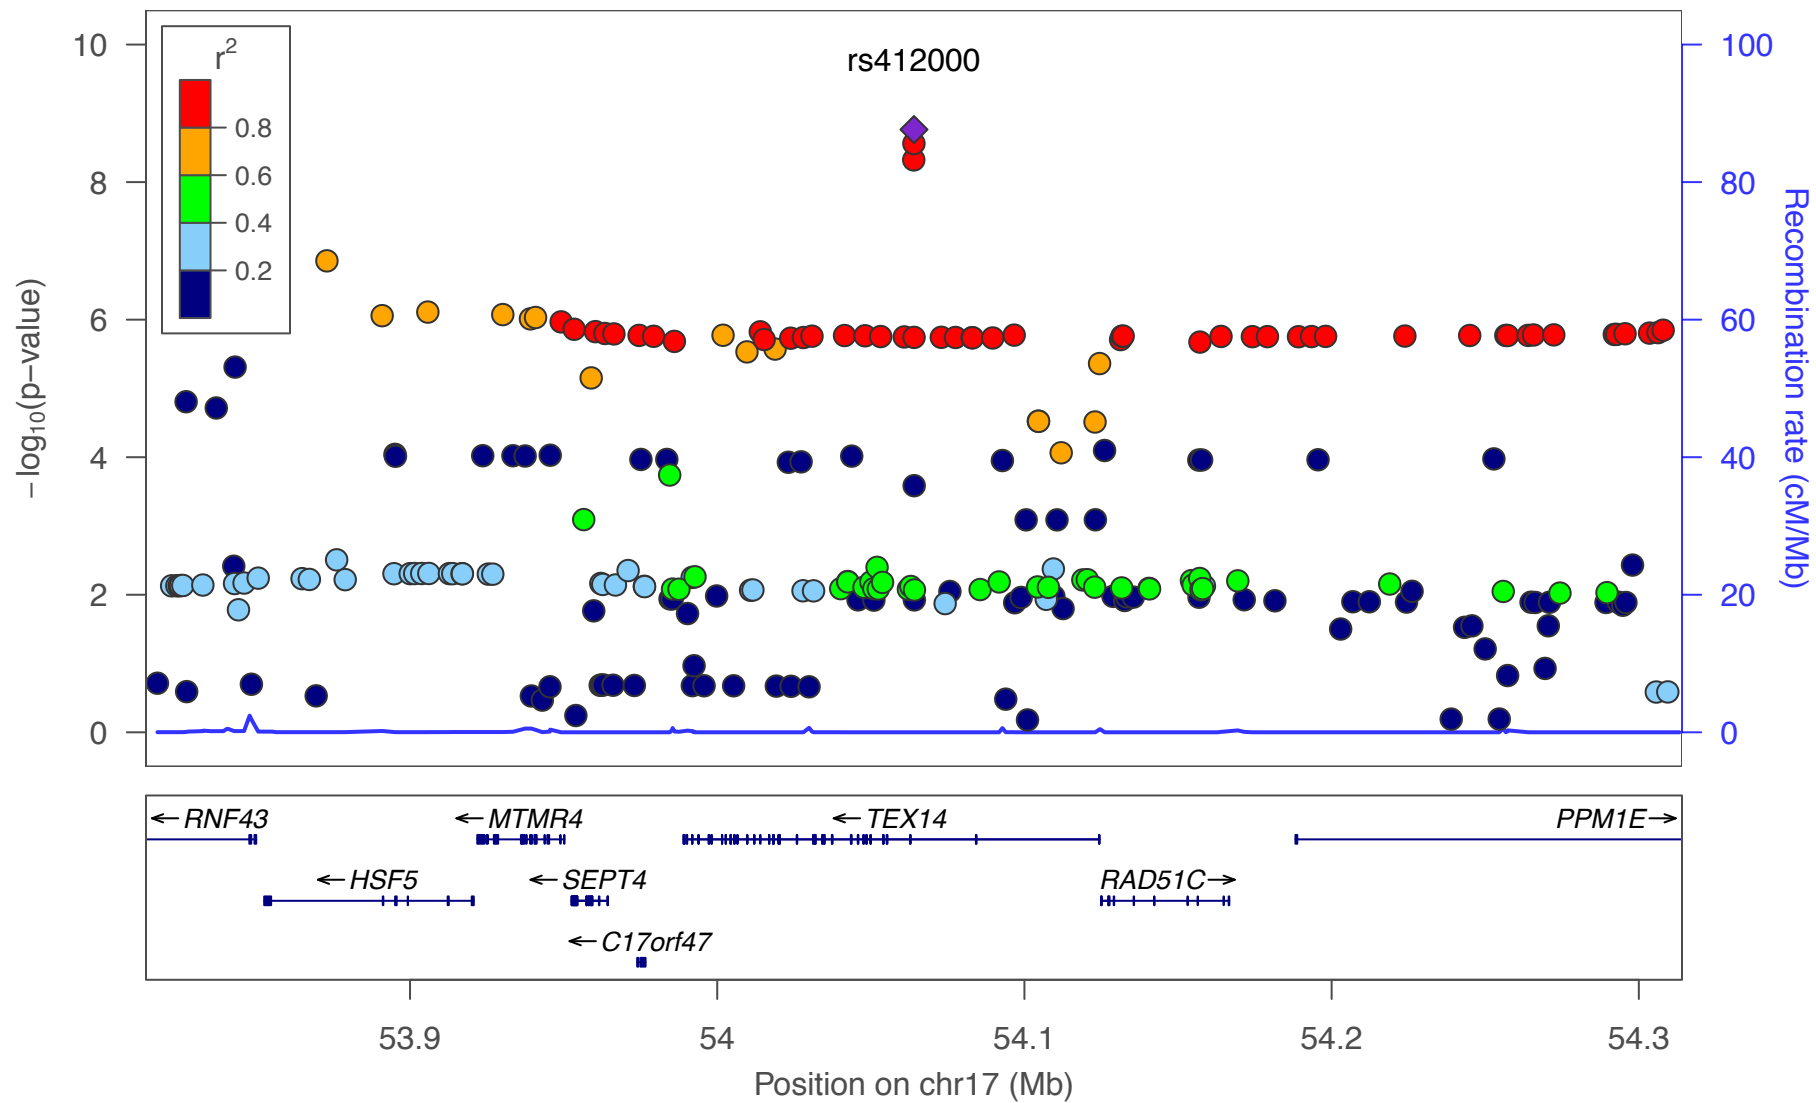

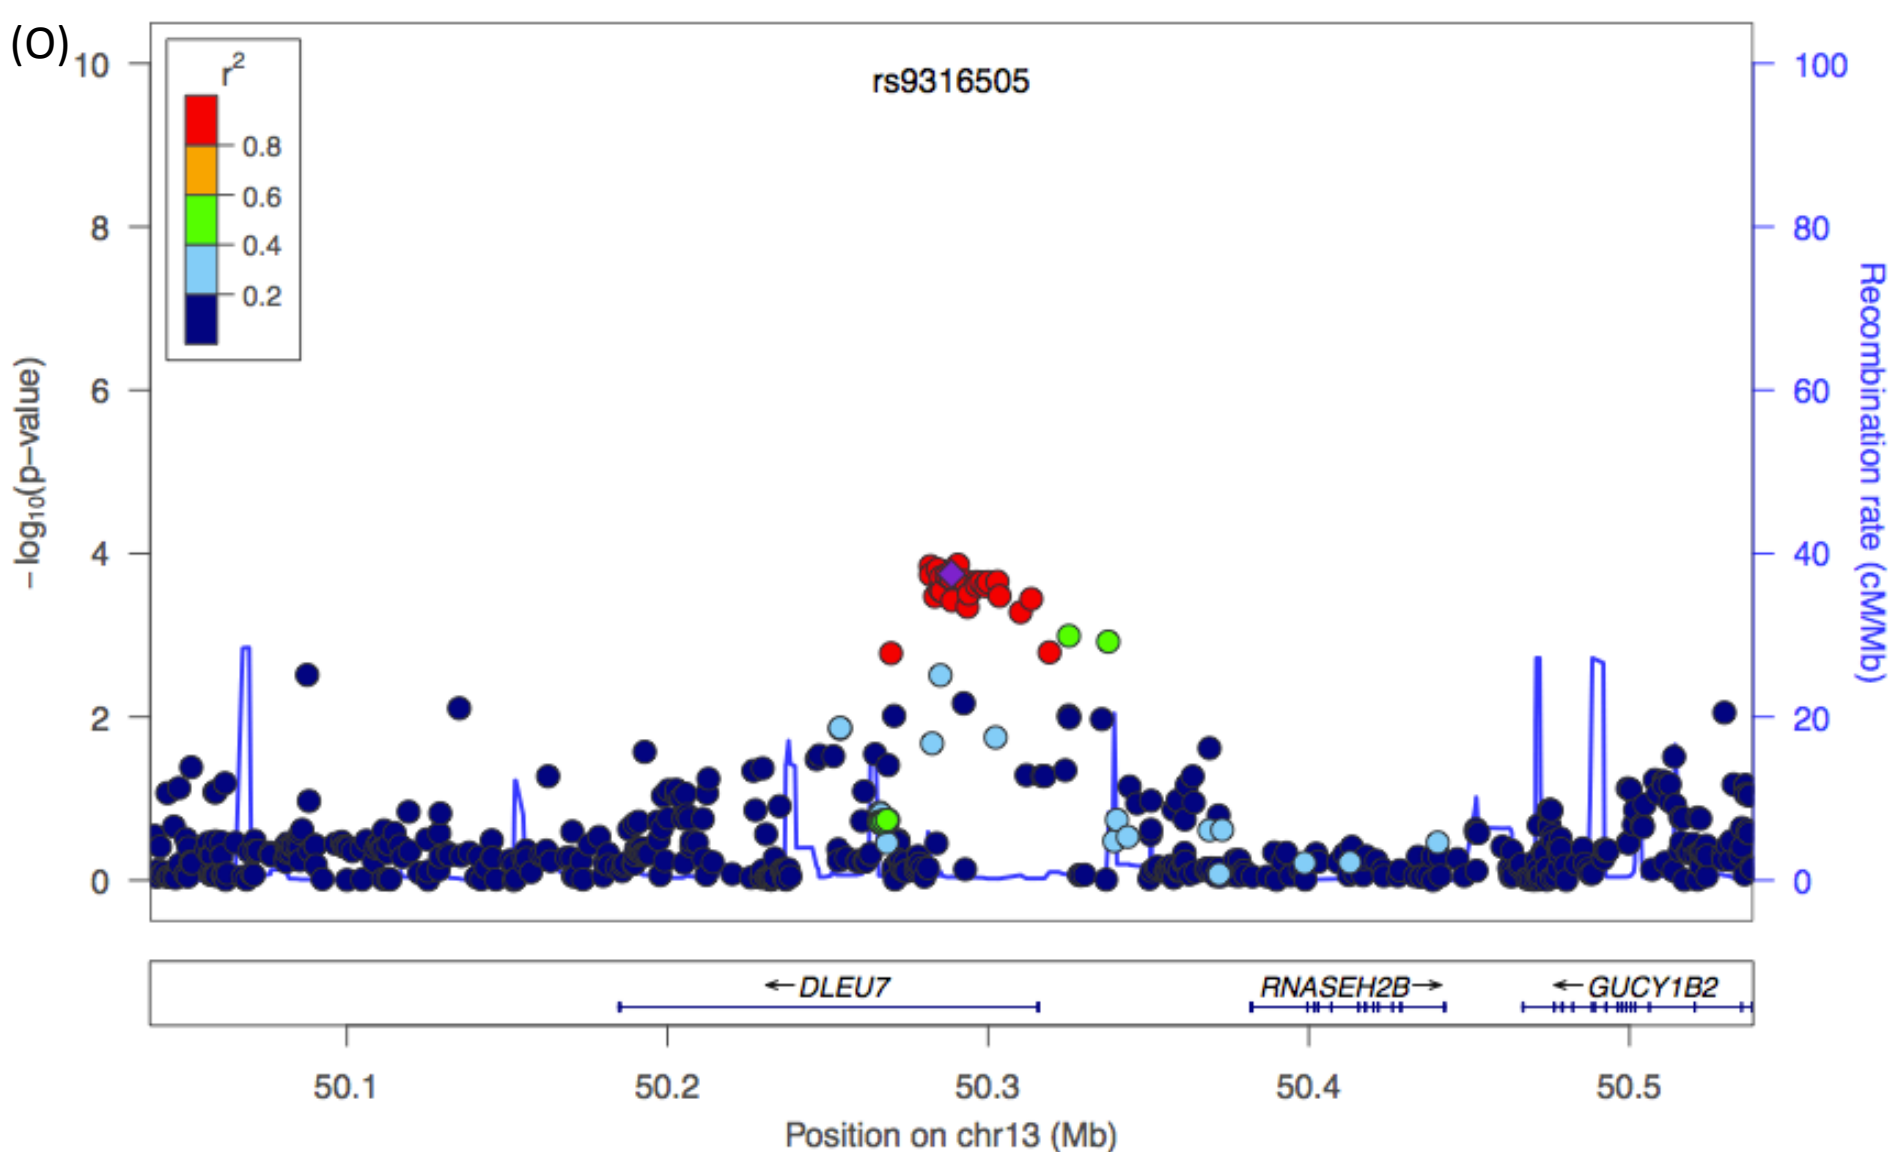

**Supplementary Figure 2:** Linkage disequilibrium and Association plot of loci reaching genome-wide significance for ‘age at first tooth’ in meta-analysis of ALSPAC and NFBC (A) rs8080944 *KCNJ16-KCNJ2* region (B) rs11796357 *FAM155-EDA* gene region (C) rs17563 *BMP4* gene region (D) rs1994969 *IGF2BP1* gene region (E) rs12229918 gene *MSRB3* (F) rs6568401 (G) rs7924176 *ADK* gene region (H) rs10740993 *CACNB2* gene region (I) rs4937076 *CDON* gene region. (J) rs17101923 *HMGA2* gene region (K) rs1799922 *CALU* (L) rs10932688 *2q35* region (M) rs997154 *AJUBA* gene region (N) rs412000 *TEX14/RAD51C* region (O) rs9316505 gene region. The most significant SNPs in each region plotted in purple. Genes are based on Genome browser (RefSeq Genes). Arrows on genes give direction of transcription.



(A)

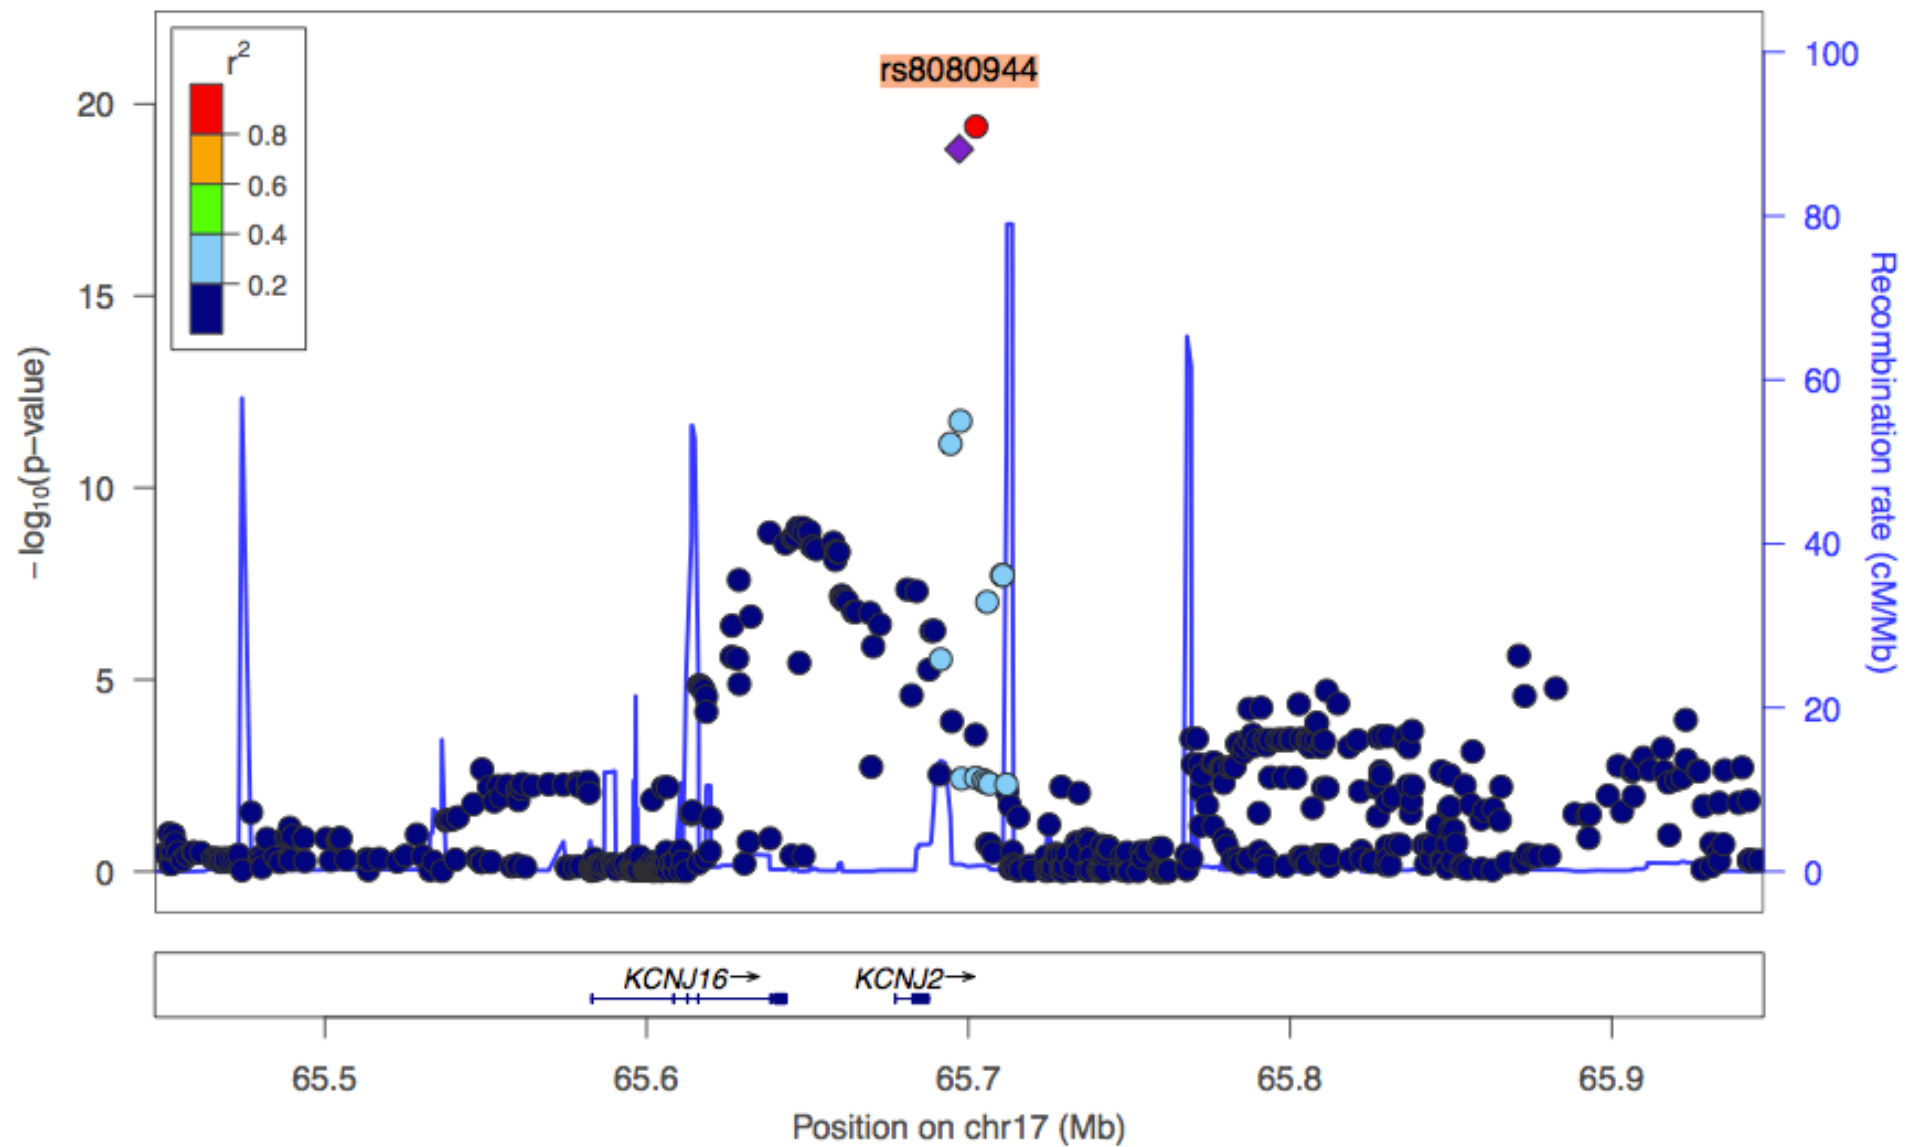

(B)

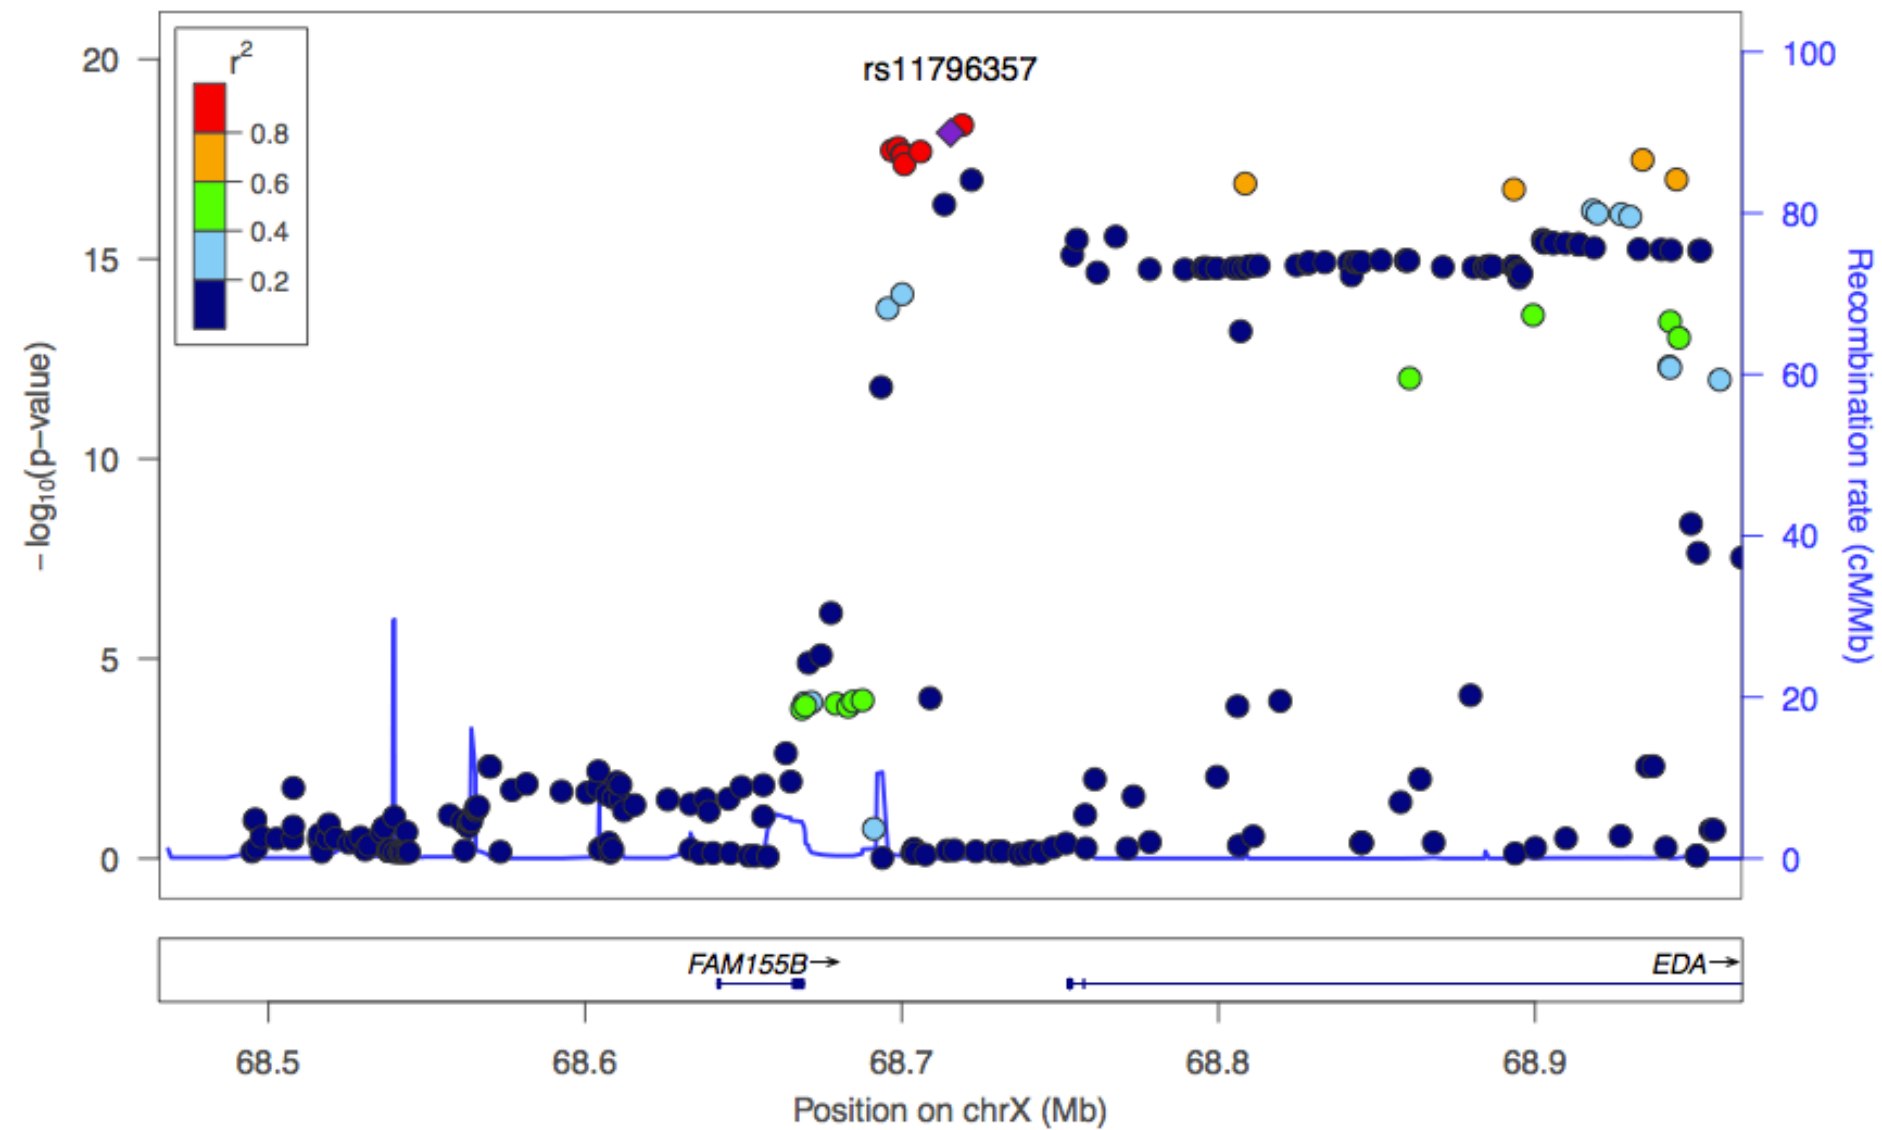

(C)

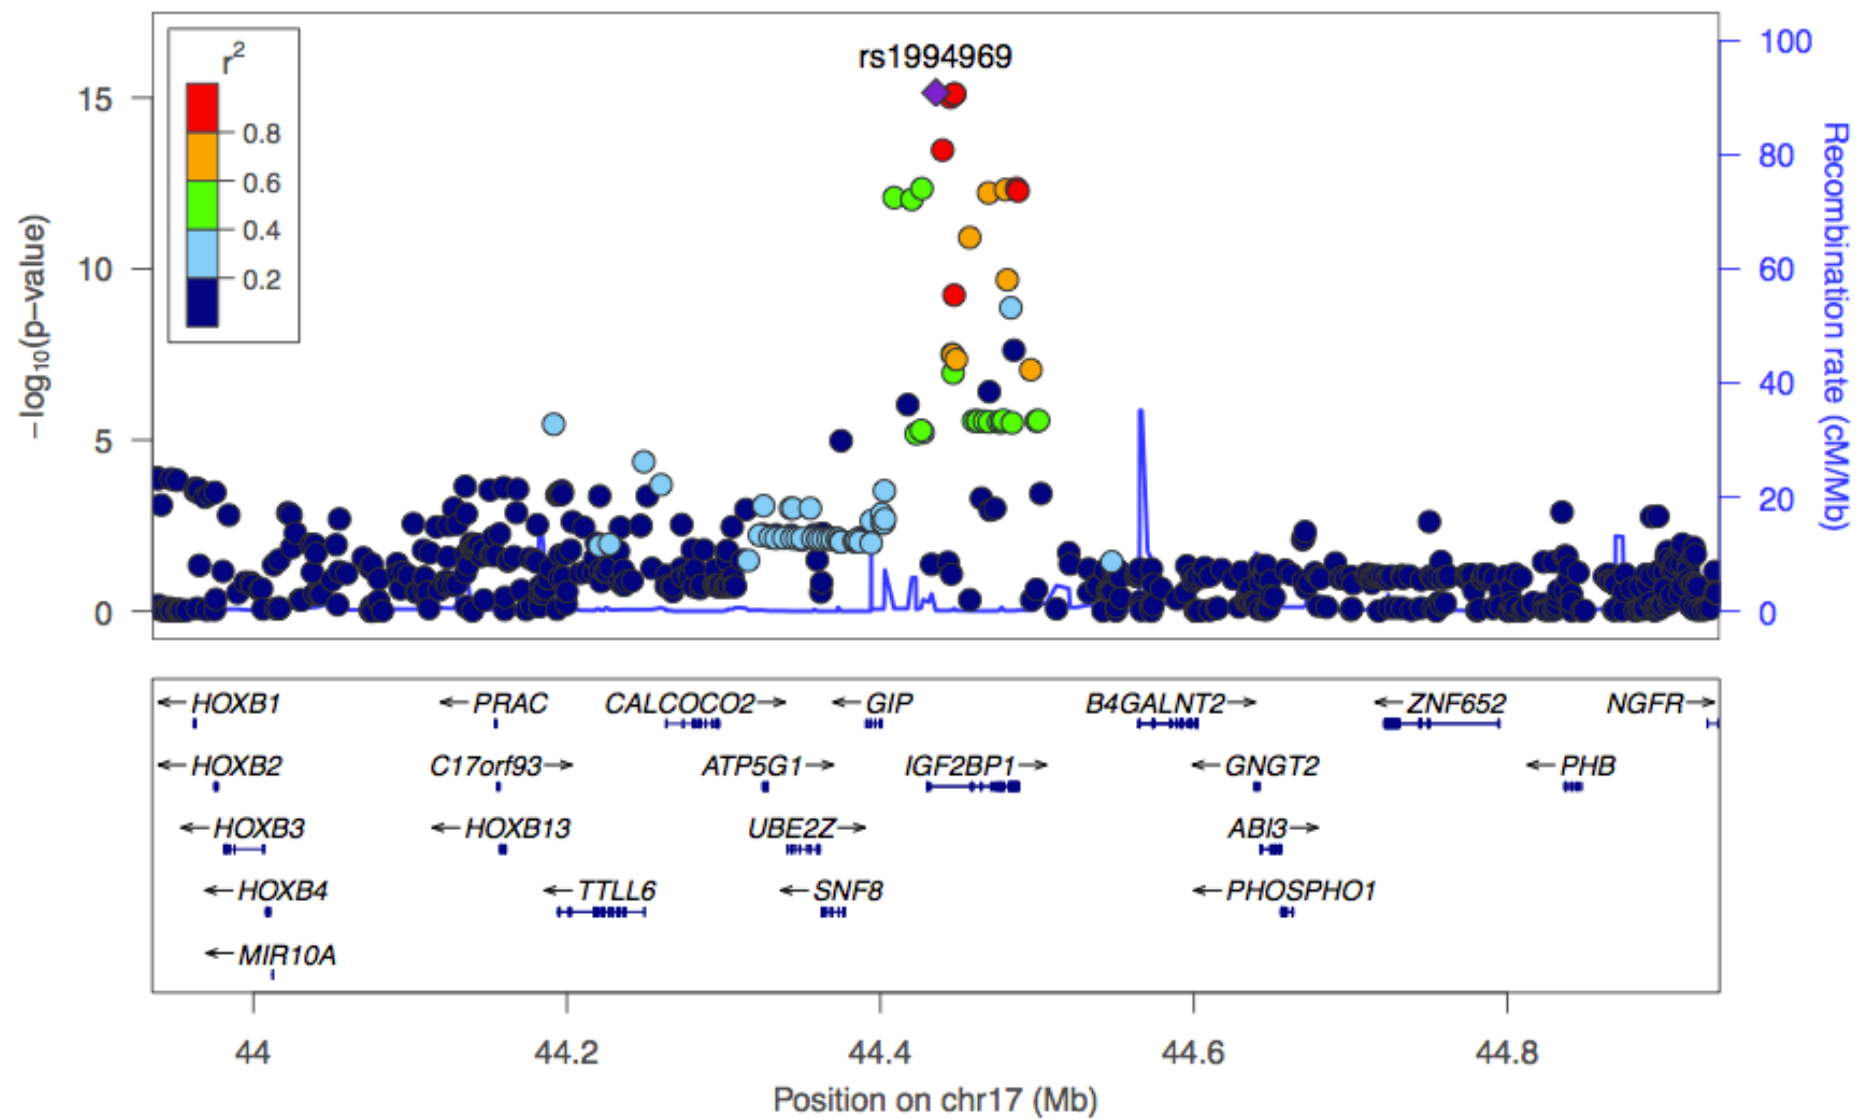

(D)

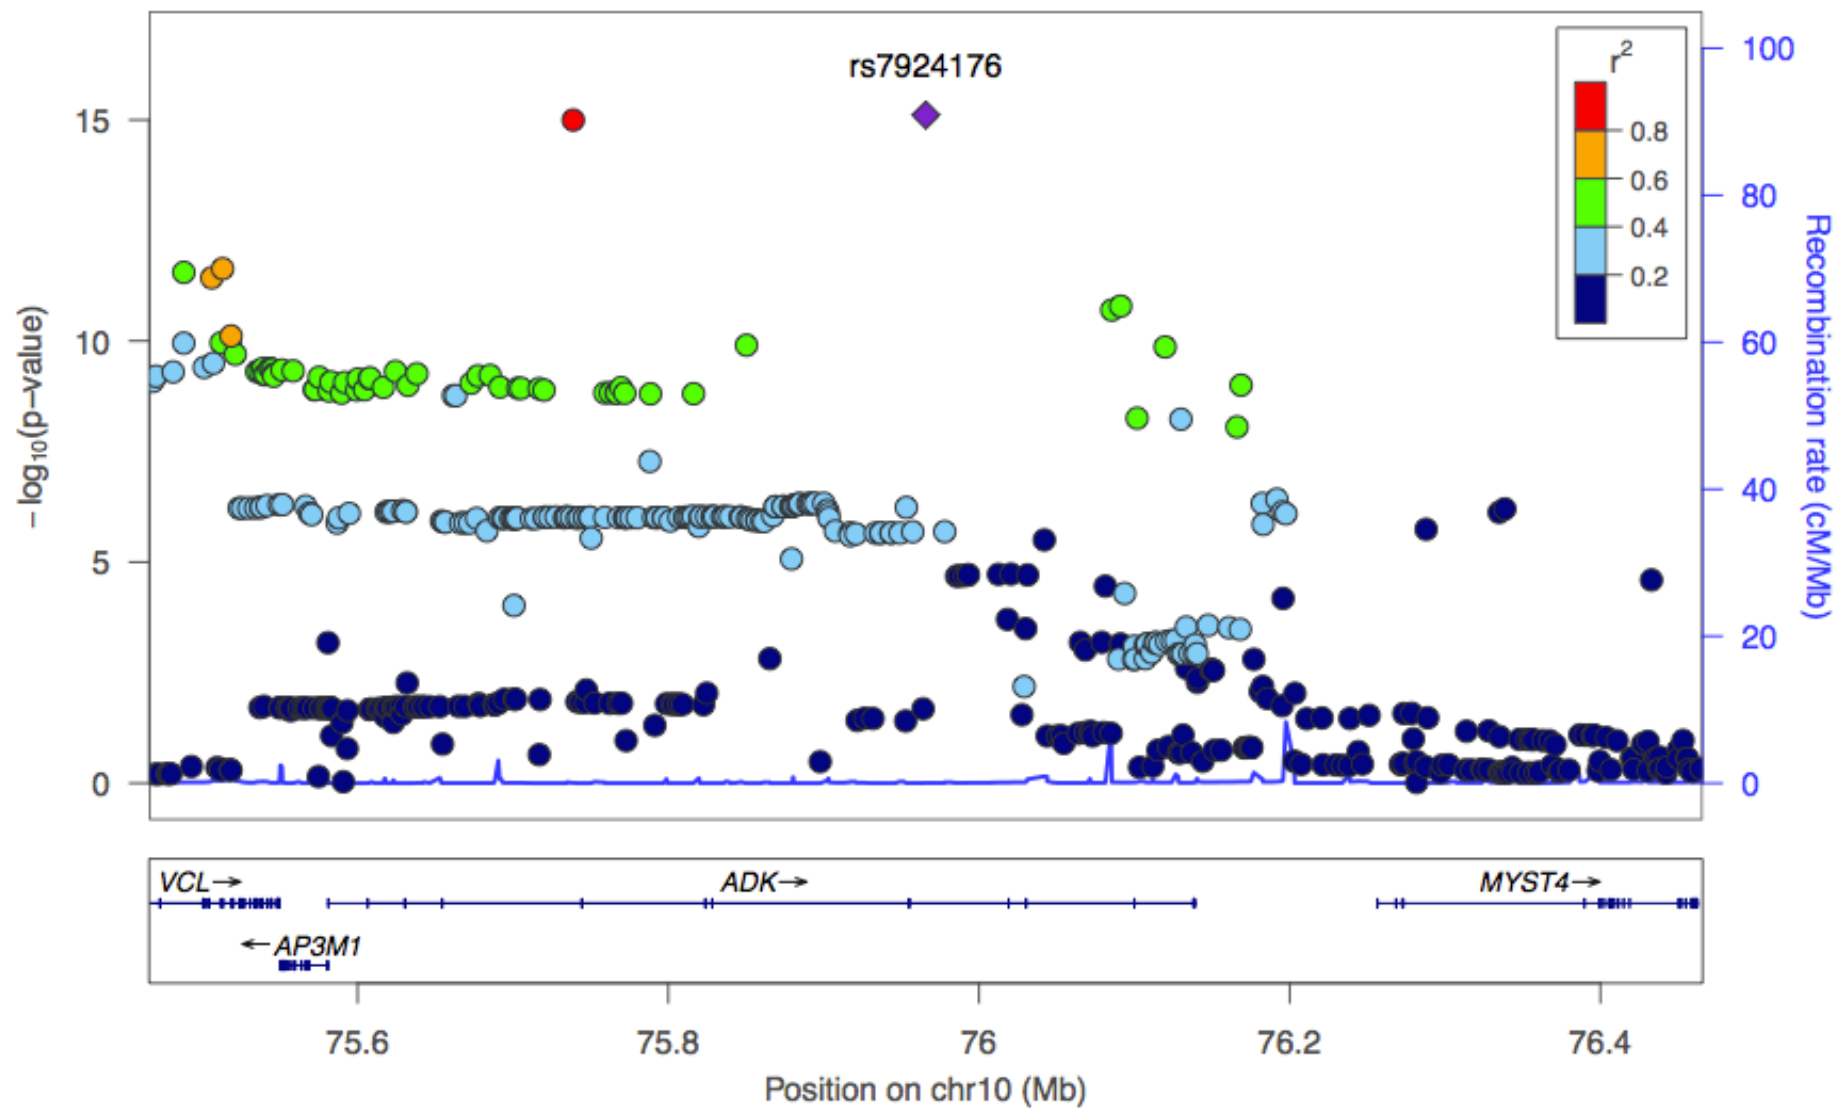

(E)

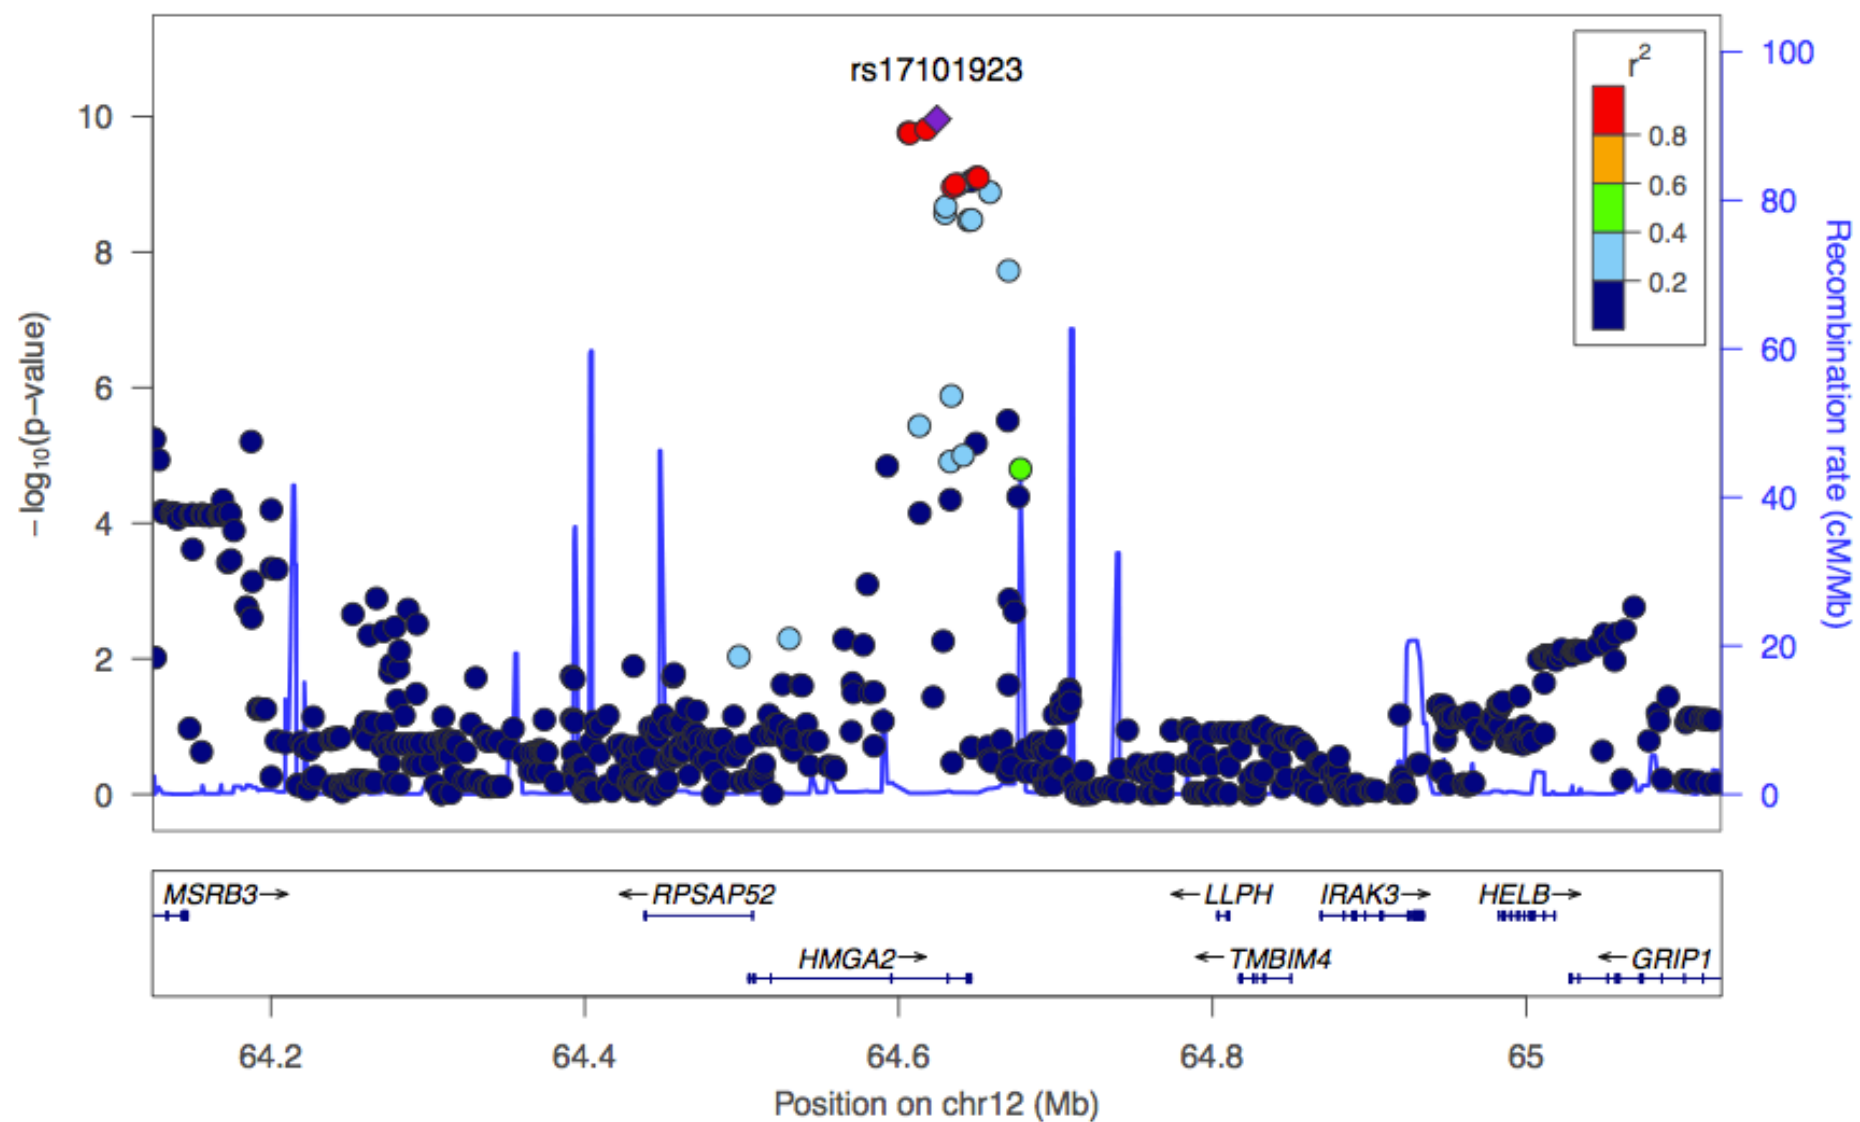

(F)

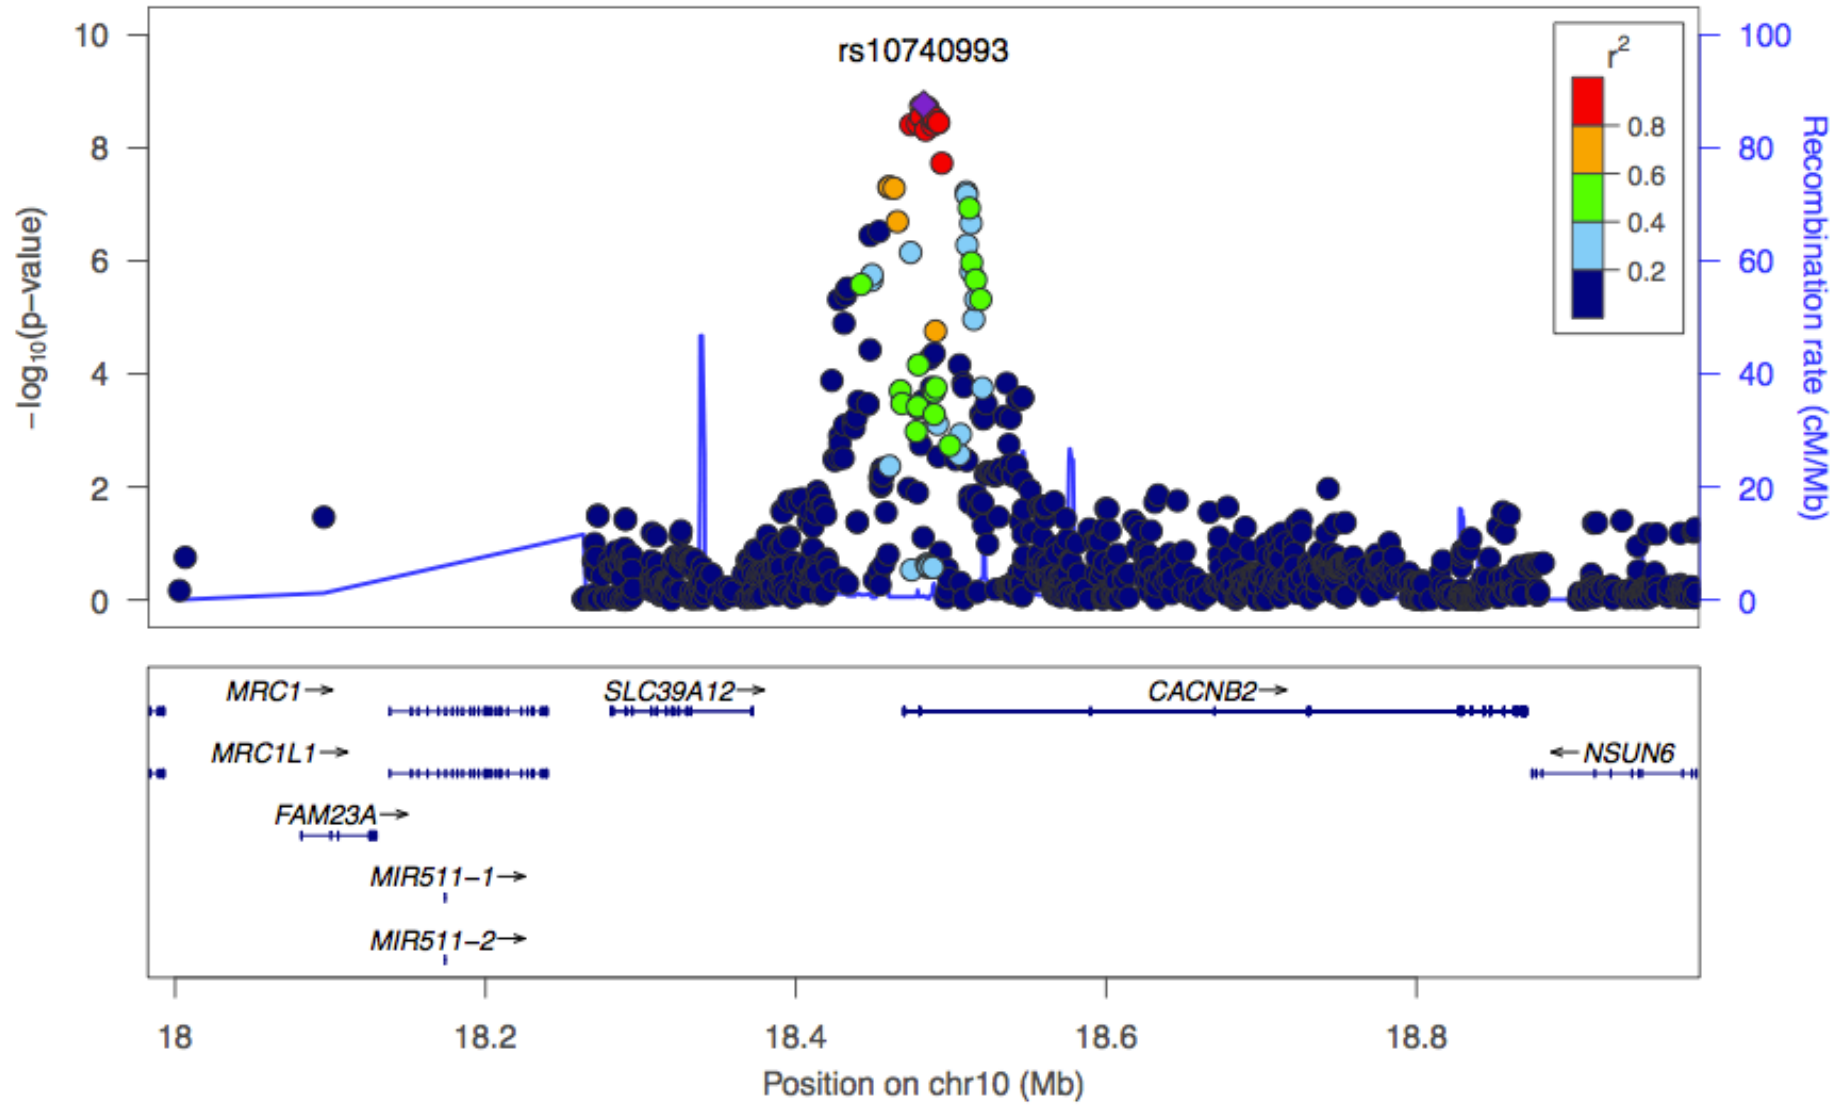

(G)

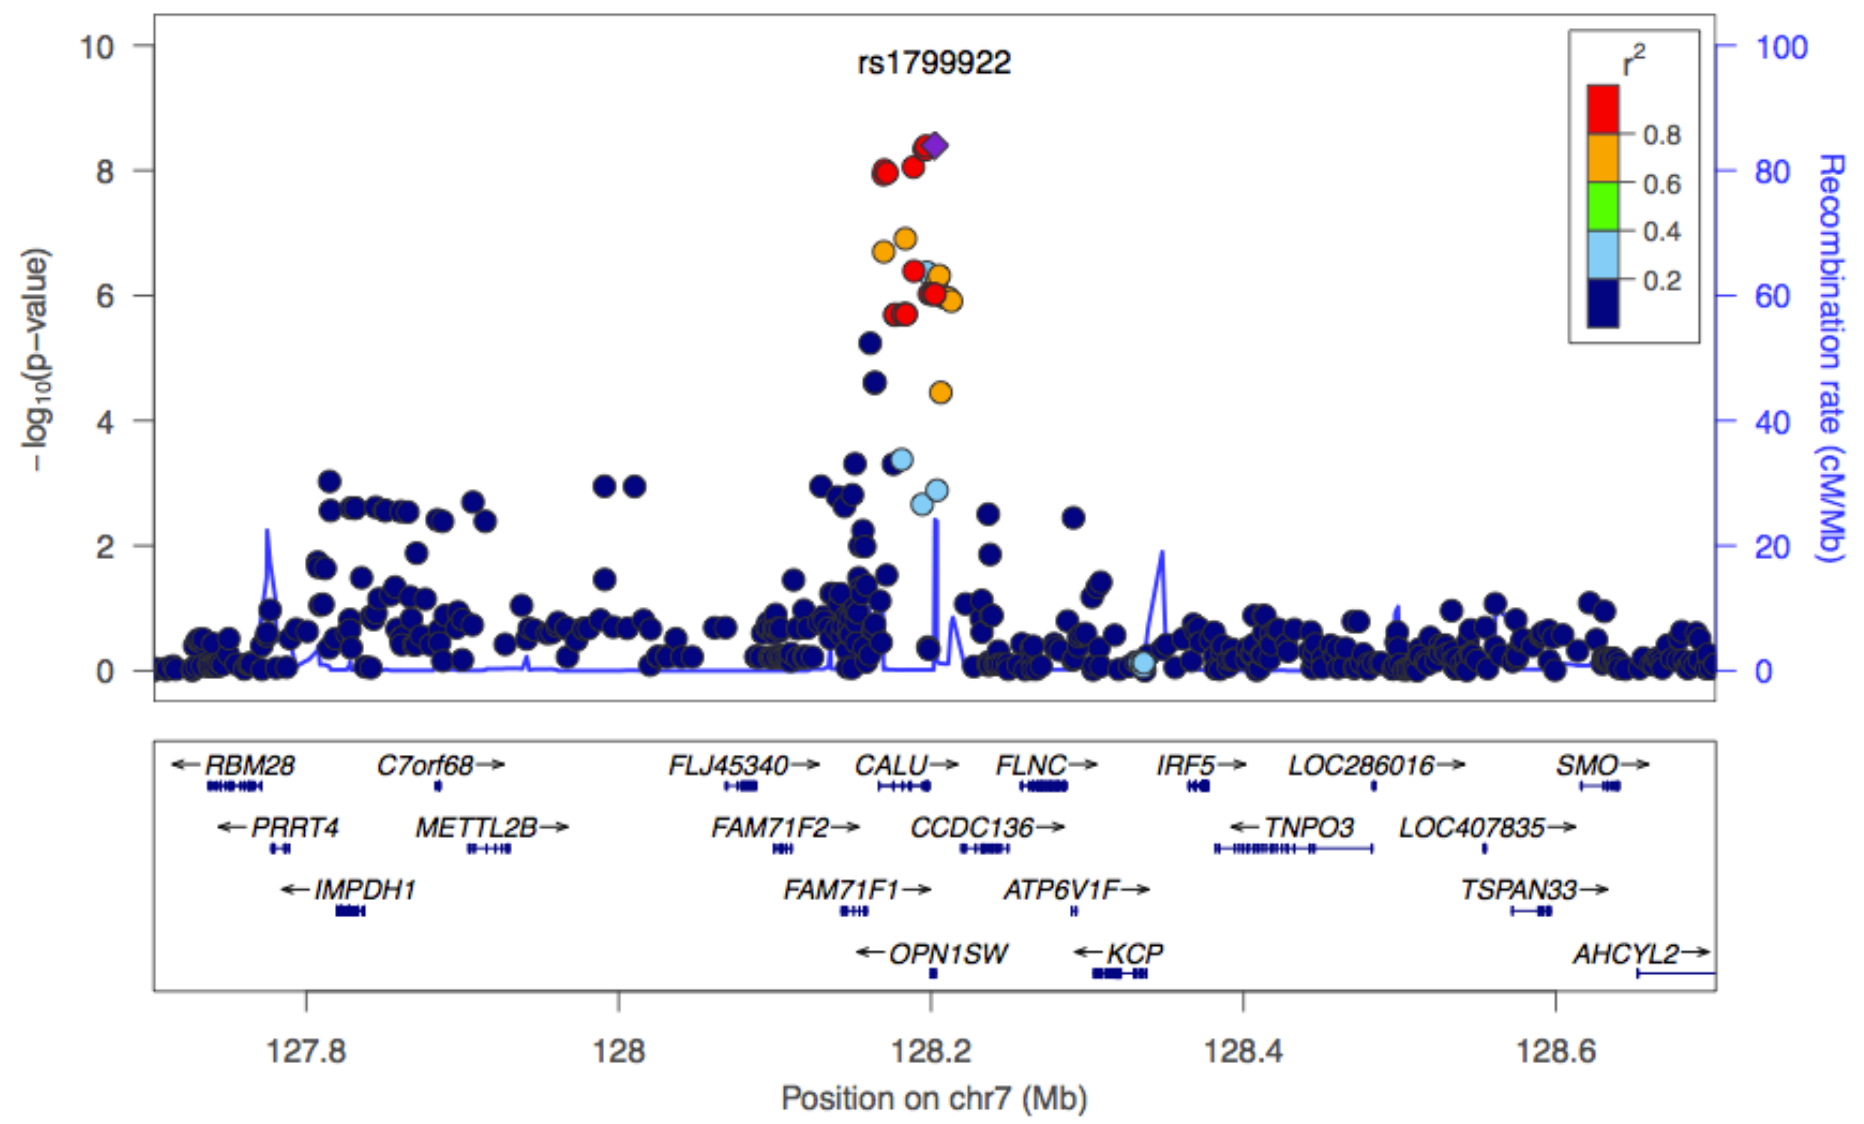

(H)

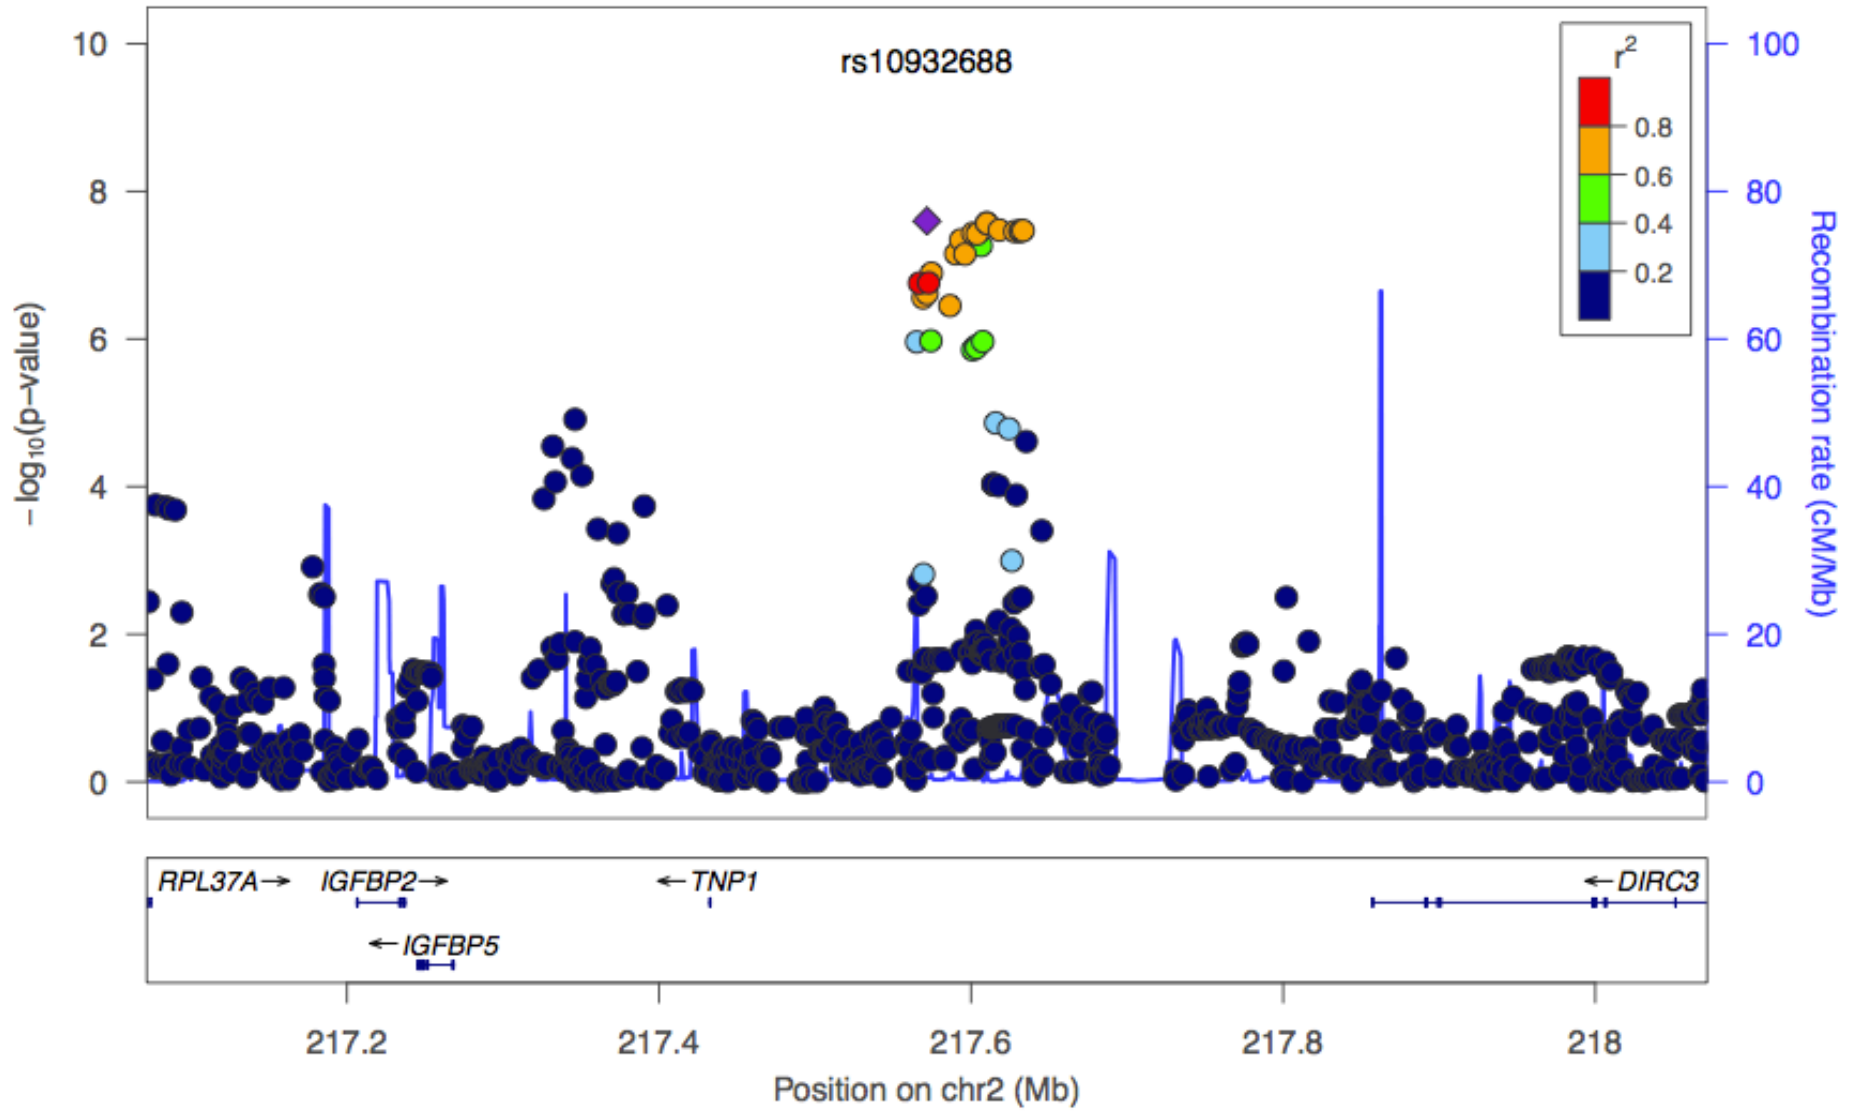



(I)

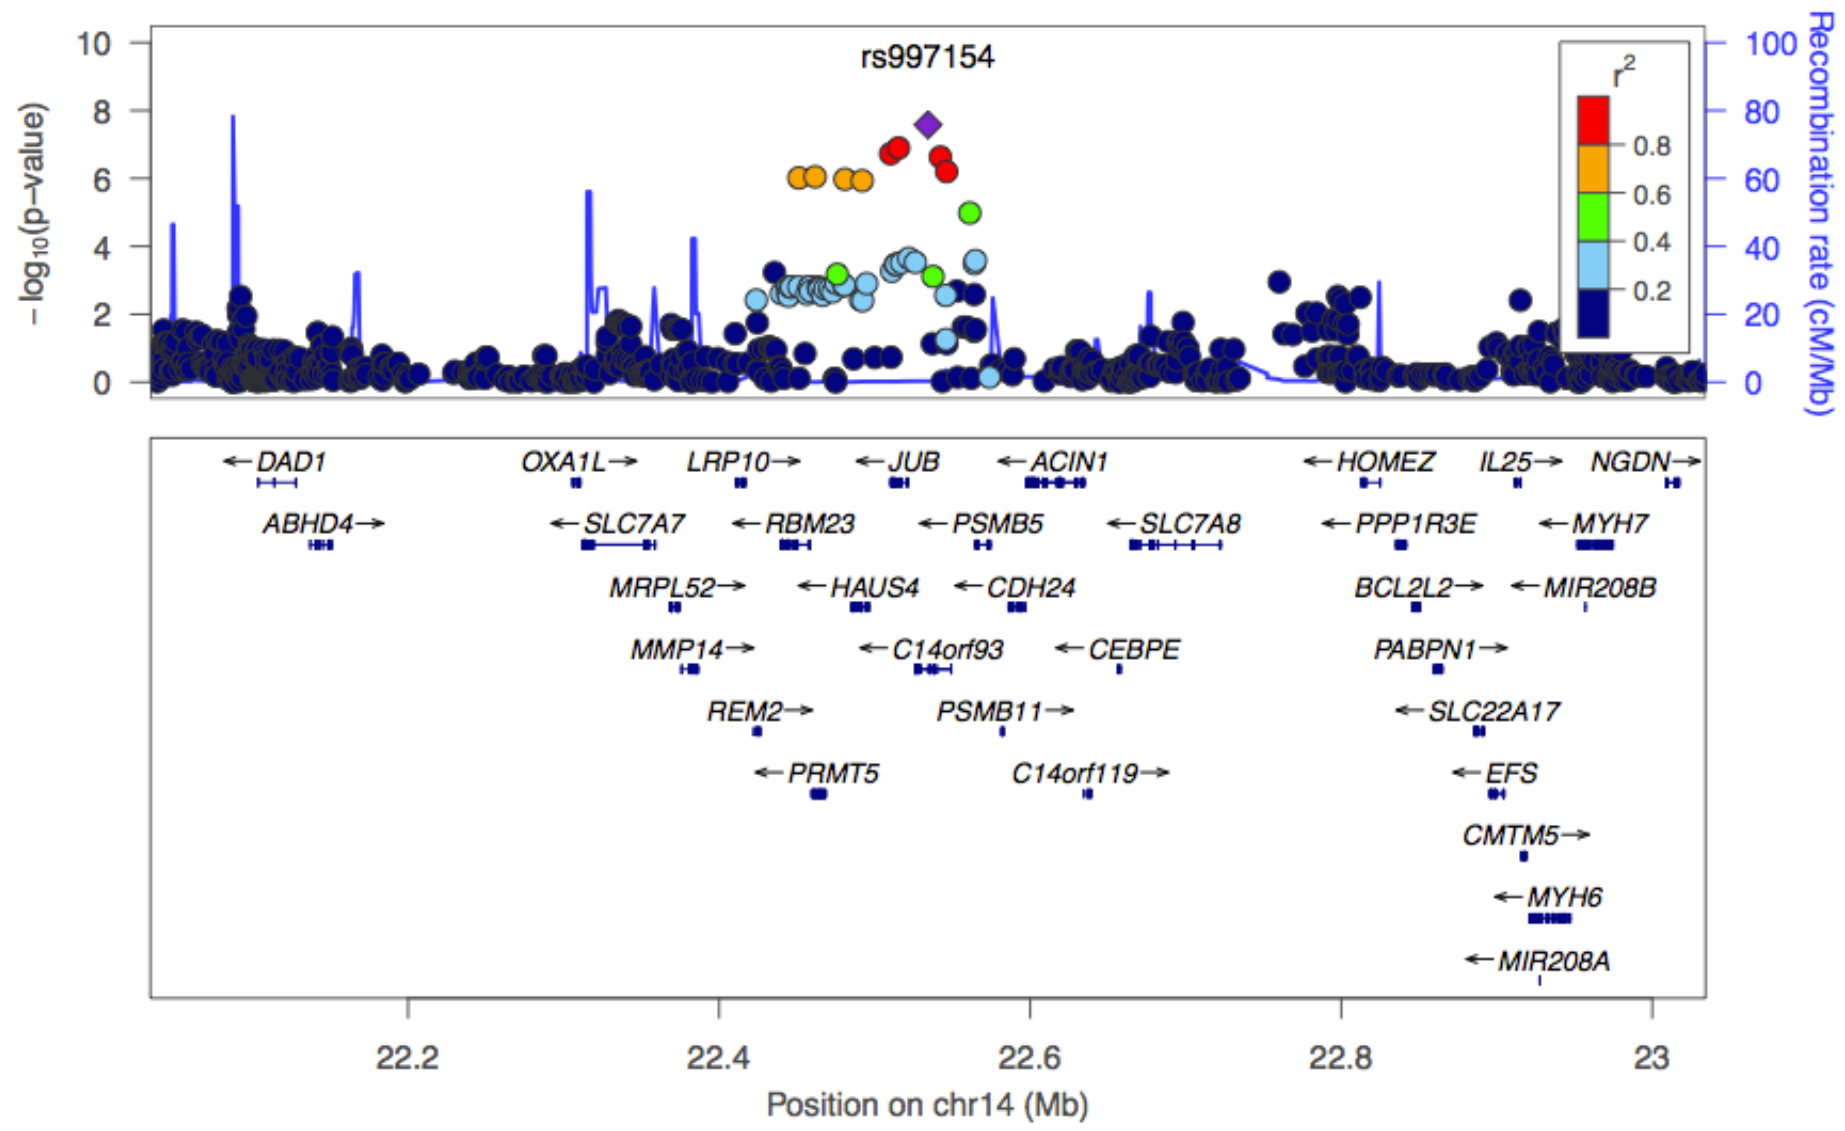

(J)

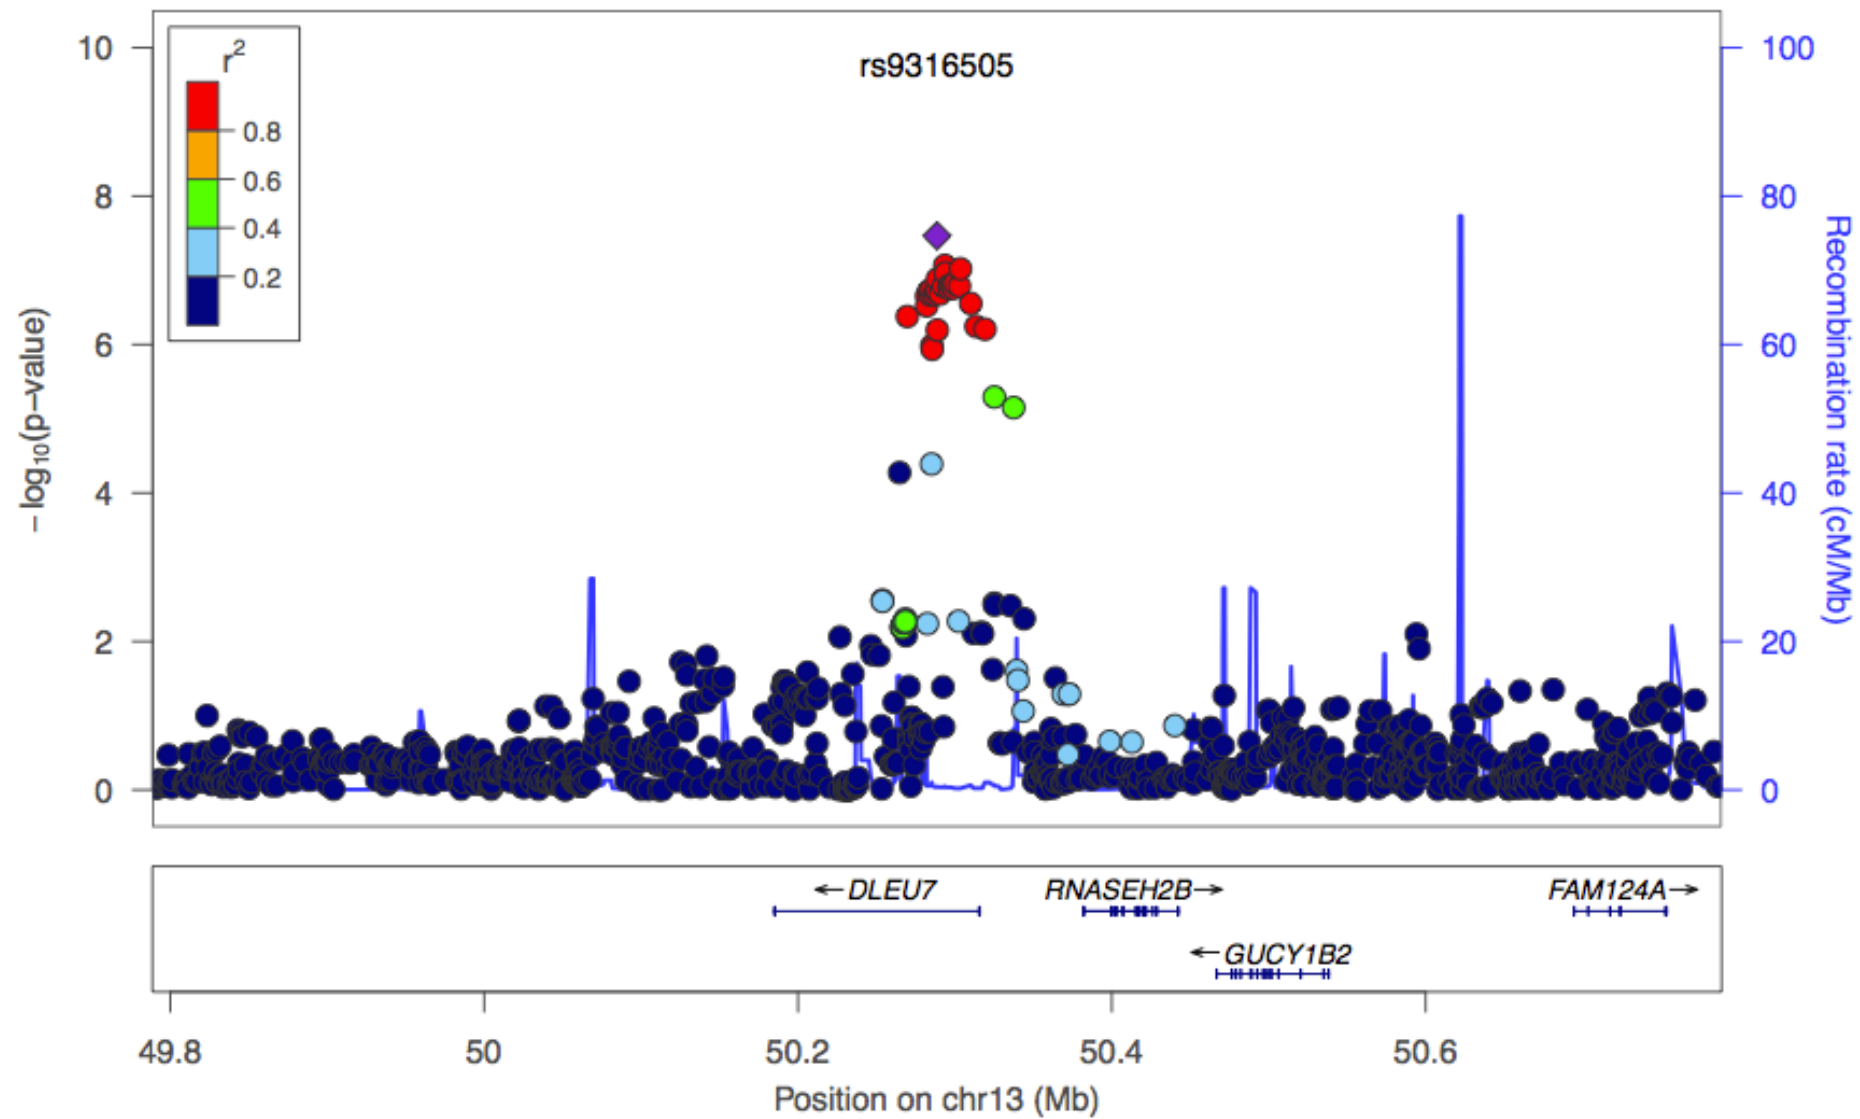

(K)

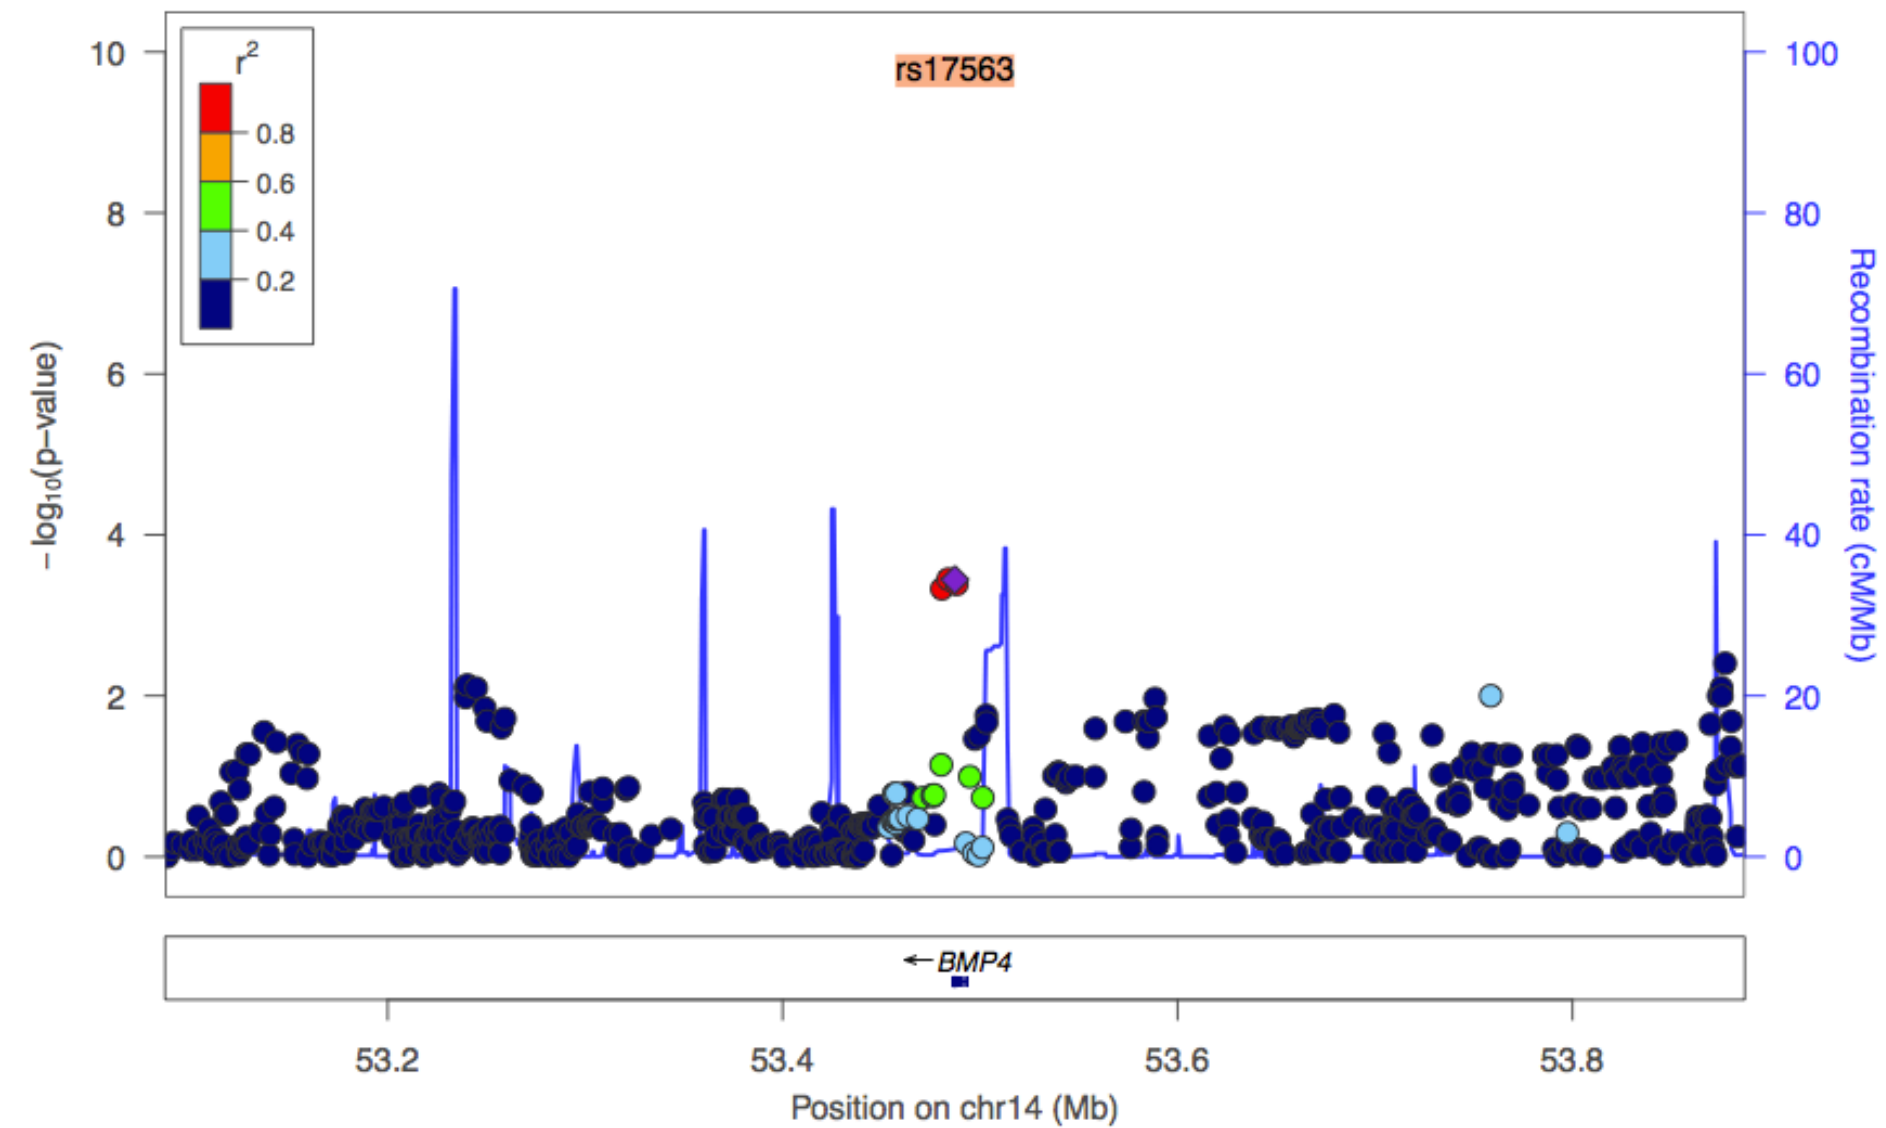

(L)

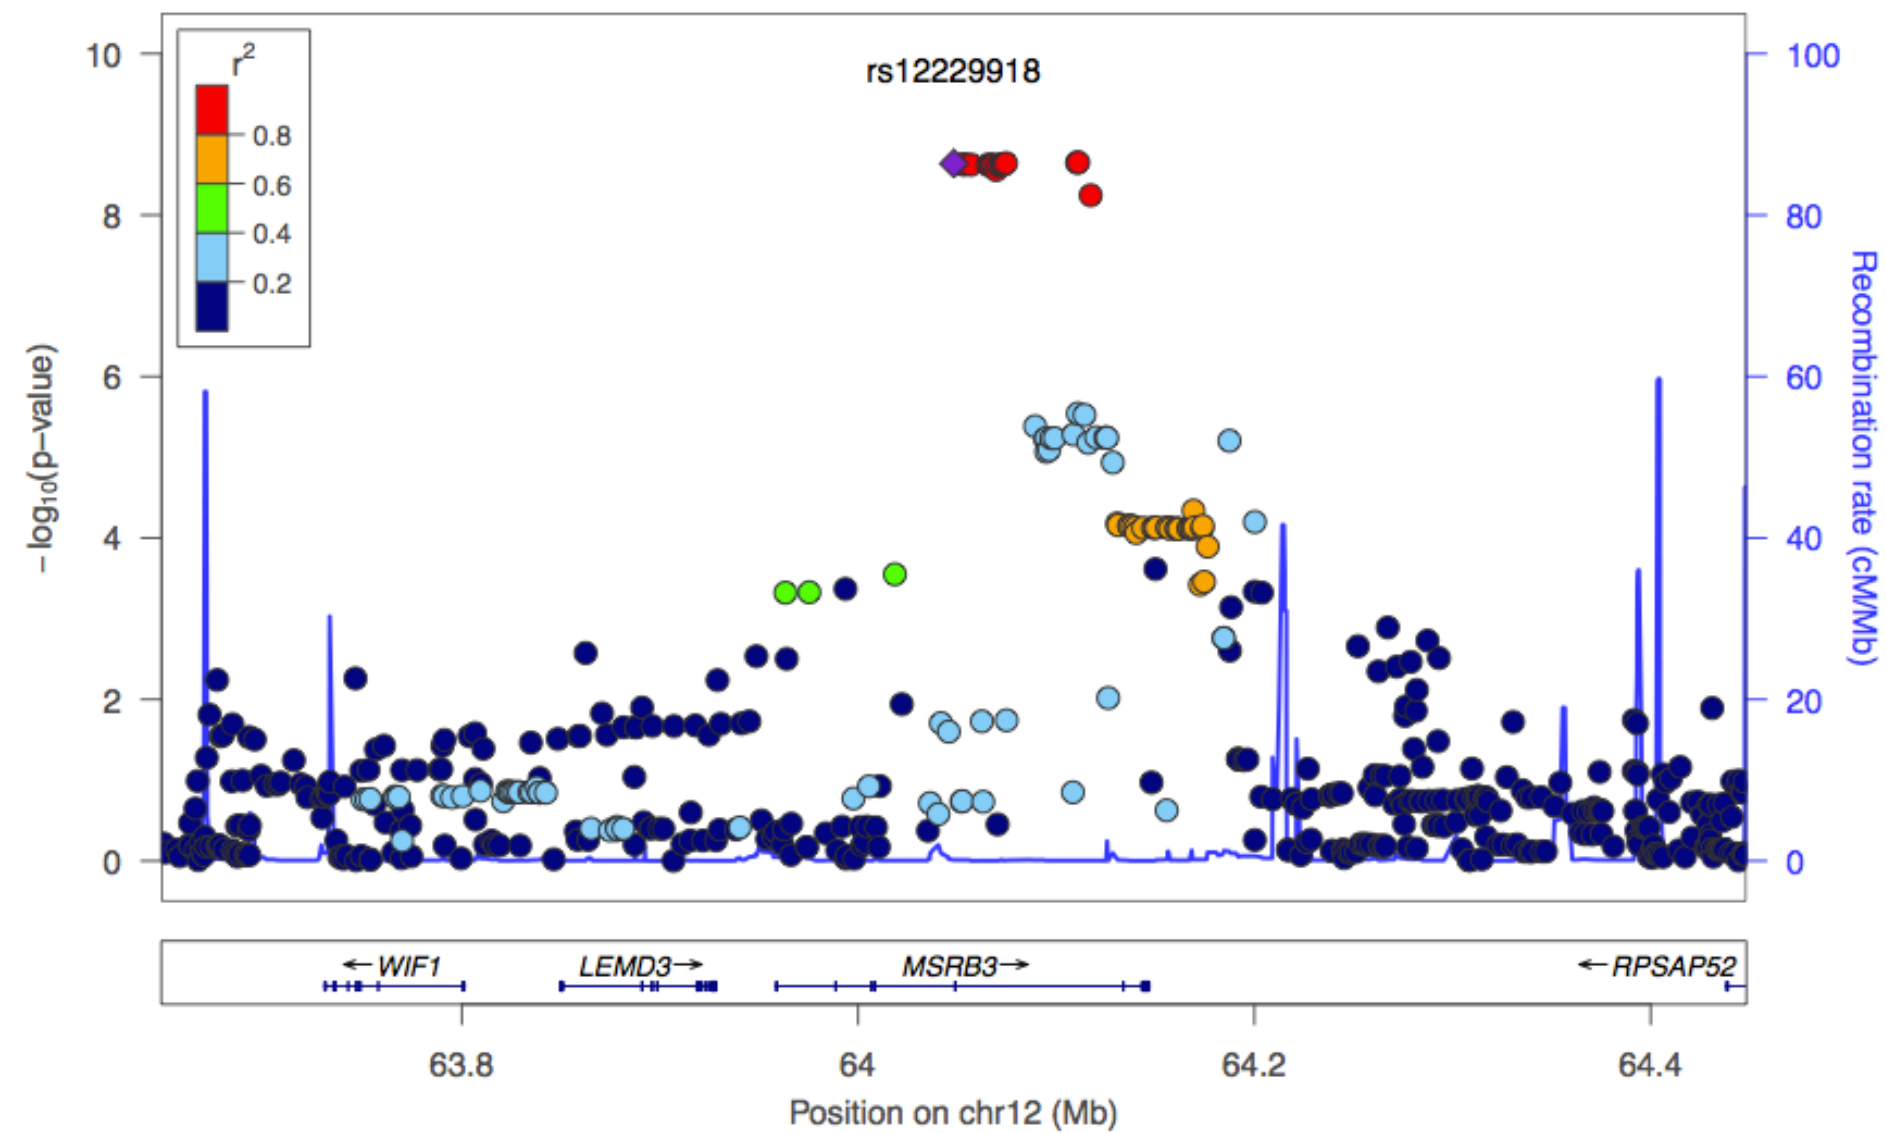

(M)

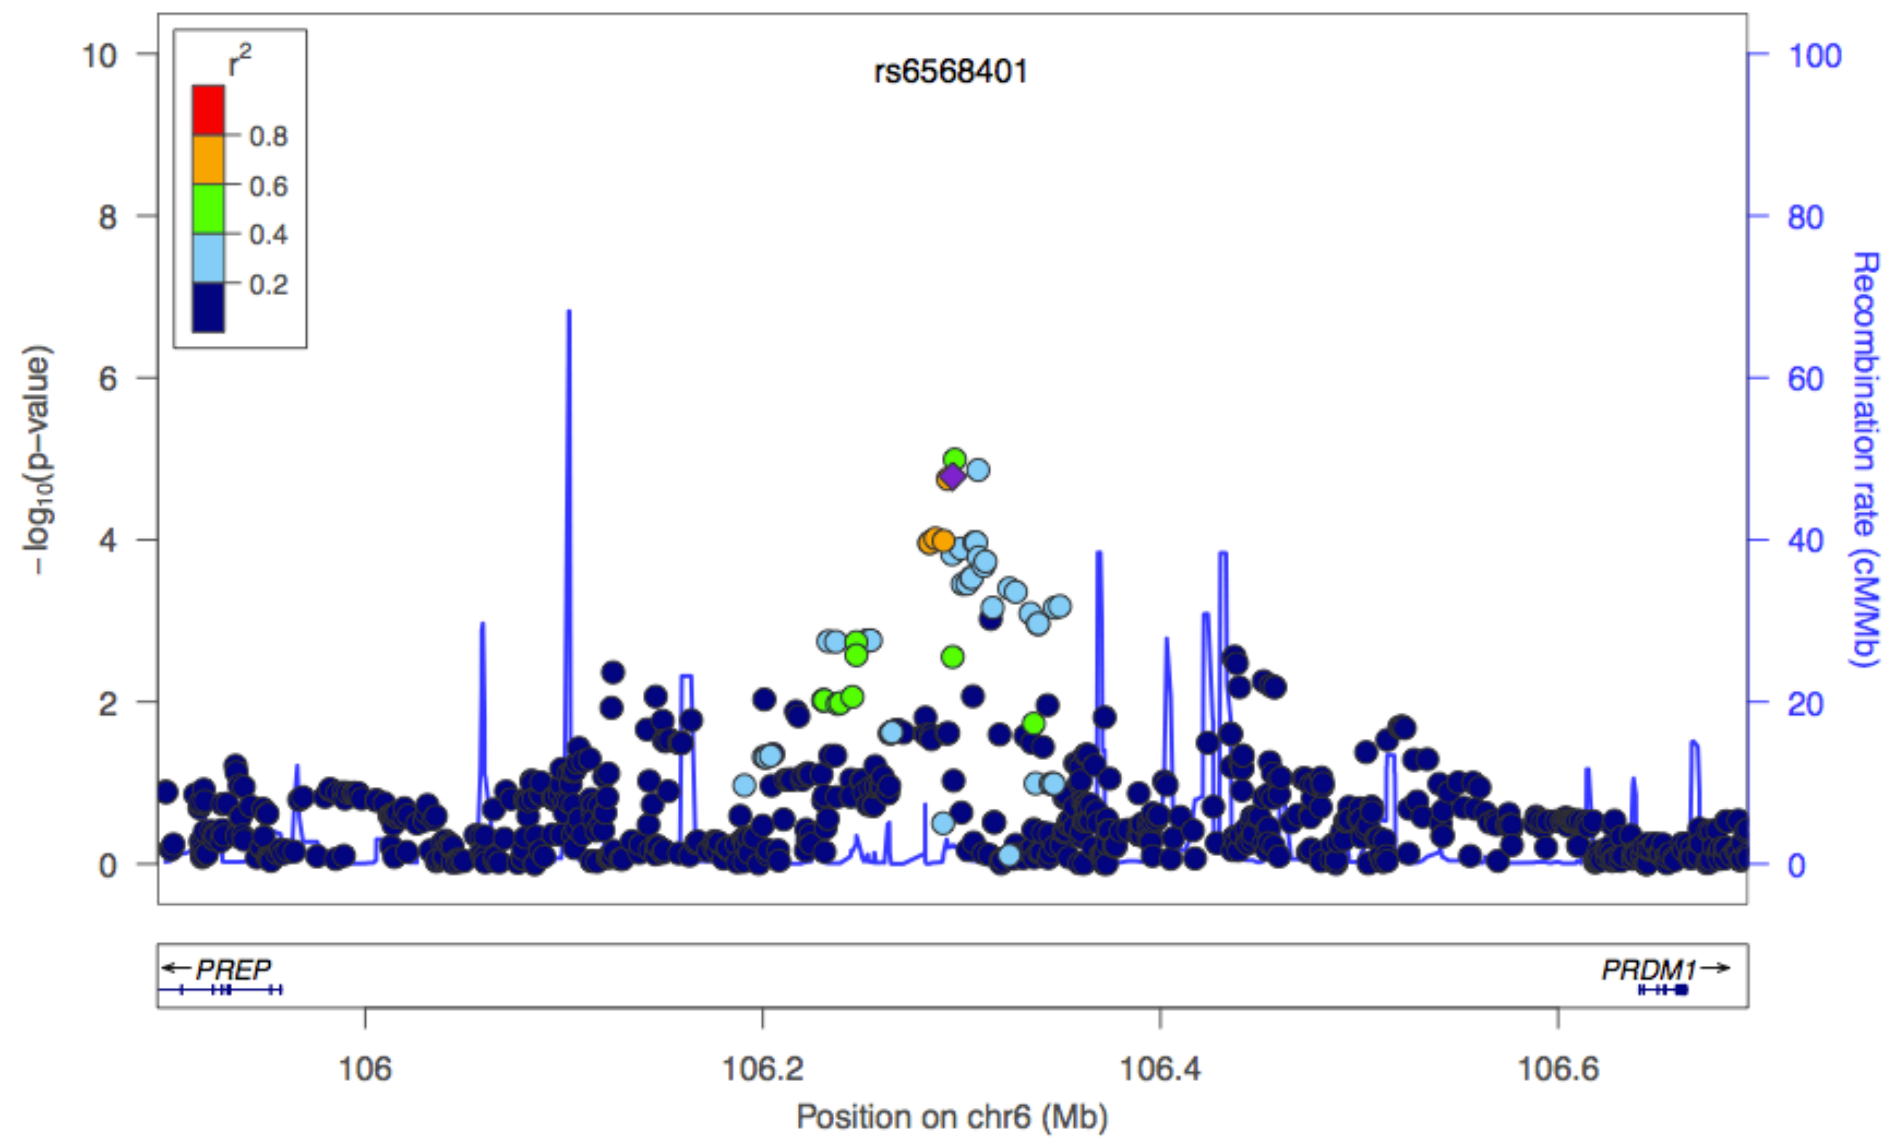

(N)

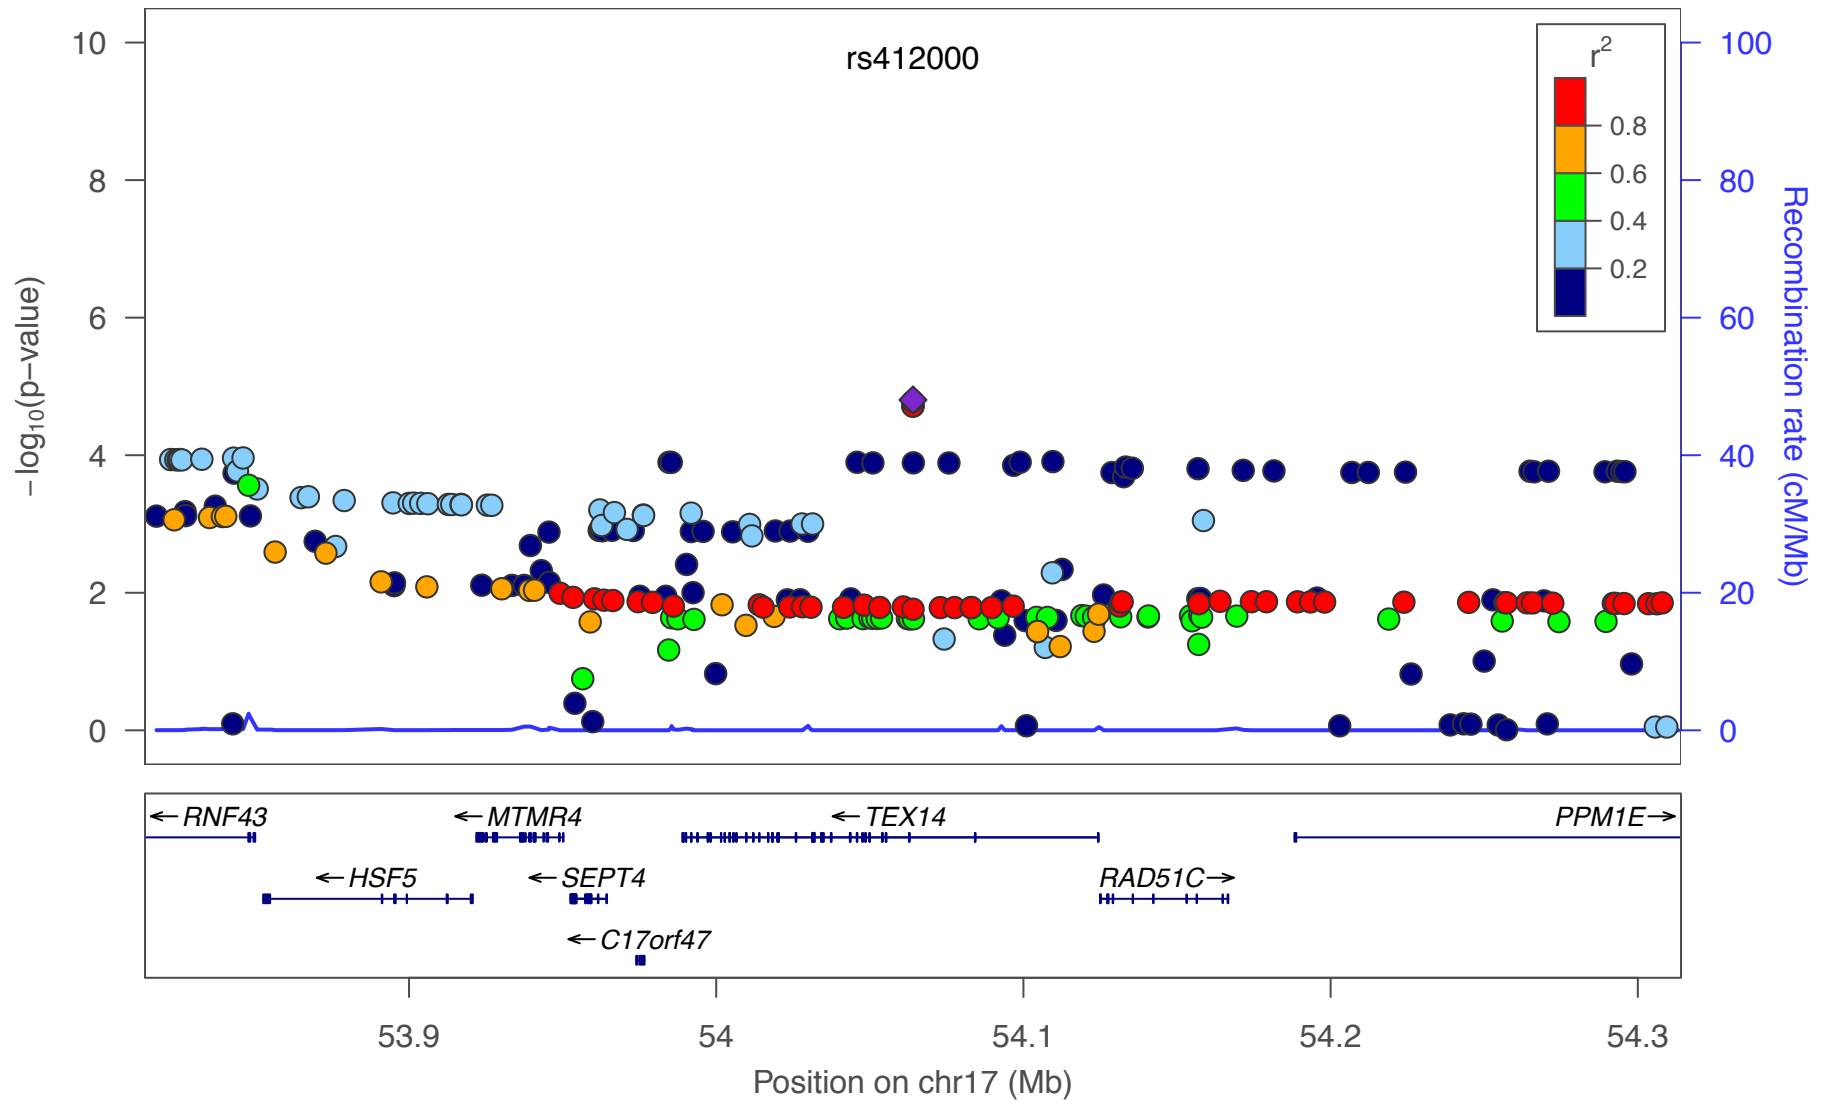

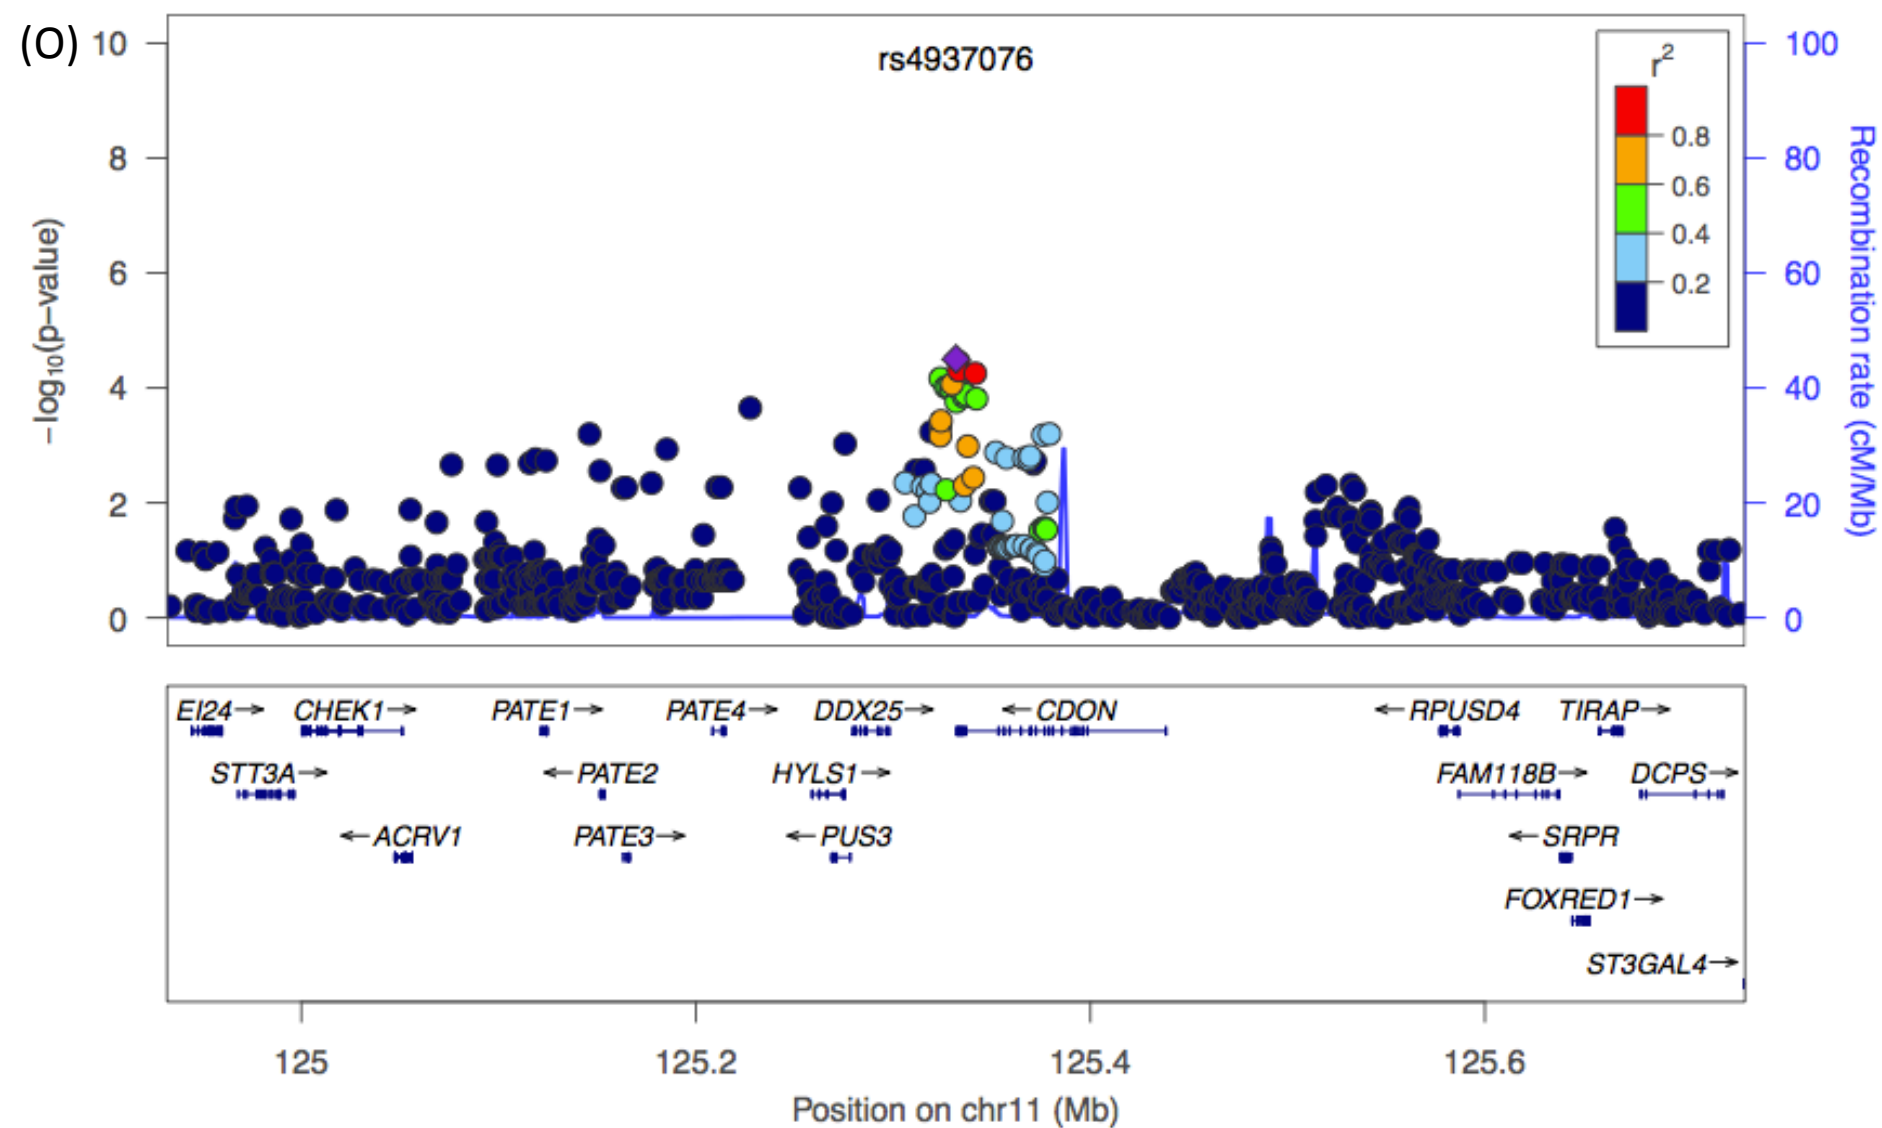

**Supplementary Figure 3:** Linkage disequilibrium and Association plot of loci reaching genome-wide significance for ‘number of teeth’ at one year in meta-analysis of ALSPAC and NFBC. (A) rs8080944 *KCNJ16-KCNJ2* region (B) rs11796357 *FAM155-EDA* gene region (C) rs1994969 *IGF3BP1* gene region (D) rs7924176 *ADK* gene region (E) rs17101923 *HMGGA2* gene region (F) rs10740993 *CACNB2* gene region (G) rs1799922 *CALU* (H) rs10932688 2q35 (I) rs997154 *AJUBA* gene region (J) rs9316505 *DLEU7* gene region (K) rs17563 *BMP4* gene region (L) rs12229918 *MSRB3* gene region (M) rs6568401 region (N) rs412000 *TEX14/RAD51C* region (O) rs4937076 *CDON* gene region. The most significant SNPs in each region plotted in purple. Genes are based on Genome browser (RefSeq Genes). Arrows on genes give direction of transcription.

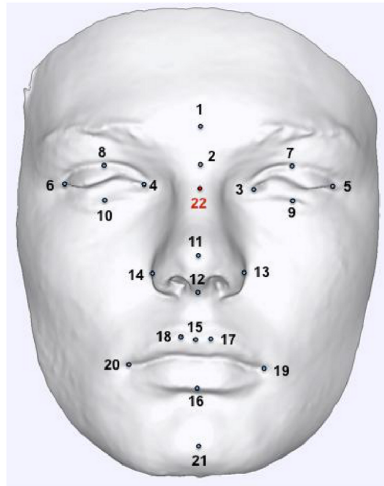

| No | Abbreviation | Name                      |
|----|--------------|---------------------------|
| 1  | g            | Glabella                  |
| 2  | n            | Nasion                    |
| 3  | enL          | Left endocanthion         |
| 4  | enR          | Right endocanthion        |
| 5  | exL          | Left exocanthion          |
| 6  | exR          | Right exocanthion         |
| 7  | psL          | Left palpebrale superius  |
| 8  | psR          | Right palpebrale superius |
| 9  | piL          | Left palpebrale inferius  |
| 10 | piR          | Right palpebrale inferius |
| 11 | prn          | Pronasale                 |
| 12 | sn           | Subnasale                 |
| 13 | alL          | Left alare                |
| 14 | alR          | Right alare               |
| 15 | ls           | Labiale superius          |
| 16 | li           | Labiale inferius          |
| 17 | cphL         | Left crista philtri       |
| 18 | cphR         | Right crista philtri      |
| 19 | chL          | Left cheilion             |
| 20 | chR          | Right cheilion            |
| 21 | pg           | Pogonion                  |
| 22 | men          | Mid-endocanthion point    |

| Forehead & Eyes |         | Lips & Mouth |           | Nose  |         | Chin  |         |
|-----------------|---------|--------------|-----------|-------|---------|-------|---------|
| 1-22            | g-men*  | 12-15        | sn-ls     | 2-22  | n-men*  | 21-22 | pg-men* |
| 1-2             | g-n     | 15-16        | ls-li     | 12-22 | sn-men* | 21-1  | pg-g    |
| 3-4             | enL-enR | 16-21        | li-pg     | 2-11  | n-prn   | 21-2  | pg-n    |
| 5-6             | exL-exR | 15-21        | ls-pg     | 2-12  | n-sn    | 21-12 | pg-sn   |
| 7-8             | psL-psR | 15-17        | ls-cphL   | 2-13  | n-alL   | 21-19 | pg-chL  |
| 9-10            | piL-piR | 15-18        | ls-cphR   | 2-14  | n-alR   | 21-20 | pg-chR  |
| 3-5             | enL-exL | 17-18        | cphL-cphR | 13-14 | alL-alR |       |         |
| 4-6             | enR-exR | 19-20        | chL-chR   | 11-12 | prn-sn  |       |         |
| 7-9             | psL-piL | 19-17        | chL-cphL  | 11-13 | prn-alL |       |         |
| 8-10            | psR-piR | 19-16        | chL-li    | 11-14 | prn-alR |       |         |
| 5-XZ            | exL-xz  | 20-18        | chR-cphR  | 12-13 | sn-alL  |       |         |
| 6-XZ            | exR-xz  | 20-16        | chR-li    | 12-14 | sn-alR  |       |         |
| 5-XY            | exL-xy  | 15-22        | ls-men*   |       |         |       |         |
| 6-XY            | exR-xy  | 16-22        | li-men*   |       |         |       |         |
| 5-YZ            | exL-yz  |              |           |       |         |       |         |
| 6-YZ            | exR-yz  |              |           |       |         |       |         |
| 3-XZ            | enL-xz  |              |           |       |         |       |         |
| 4-XZ            | enR-xz  |              |           |       |         |       |         |
| 3-XY            | enL-xy  |              |           |       |         |       |         |
| 4-XY            | enR-xy  |              |           |       |         |       |         |
| 3-YZ            | enL-yz  |              |           |       |         |       |         |
| 4-YZ            | enR-yz  |              |           |       |         |       |         |

**Supplementary Figure 4: Position and Definition of the 22 Landmarks and the 54 parameters analysed in Paternoster et al. (2012):** Parameters with pairs of numbers denote the direct 3D distance between pairs of landmarks. Those with “xz”, “xy” or “yz” denote the prominence of the landmark from the xz, xy, or yz planes. \*”men” (point 22) denotes the midendocanthion or midintercanthal point (the midpoint between left and right endocanthi); this point does not lie on the facial surface



| MARKER     | GENE REGION/LOCUS  | CHR | BP        | A1 | A2 | EFFECT ALSPAC | SE ALSPAC | PVALUE ALSPAC | EFFECT NFBC | SE NFBC | PVALUE NFBC | EFFECT META | SE META | PVALUE META |
|------------|--------------------|-----|-----------|----|----|---------------|-----------|---------------|-------------|---------|-------------|-------------|---------|-------------|
| rs2057579  | TMEM9              | 1   | 199365898 | T  | C  | -0.067        | 0.045     | 1.4x10-01     | -0.176      | 0.036   | 1.3x10-06   | -0.133      | 0.028   | 2.6x10-06   |
| rs11956881 | PP187              | 5   | 127951662 | C  | T  | -0.26         | 0.091     | 4.4x10-03     | -0.324      | 0.078   | 3.4x10-05   | -0.297      | 0.059   | 5.7x10-07   |
| rs9388501  | AK127472           | 6   | 126944704 | C  | T  | -0.236        | 0.043     | 2.7x10-08     | -0.085      | 0.035   | 1.3x10-02   | -0.145      | 0.027   | 5.9x10-08   |
| rs10225279 | CR623750           | 7   | 19099597  | T  | G  | -0.19         | 0.043     | 1.0x10-05     | -0.117      | 0.036   | 9.5x10-04   | -0.147      | 0.027   | 8.5x10-08   |
| rs339039   | OPN1SW             | 7   | 128203797 | A  | G  | -0.176        | 0.045     | 9.4x10-05     | -0.149      | 0.043   | 6.0x10-04   | -0.162      | 0.031   | 2.2x10-07   |
| rs1157136  | CR600271,CR593328  | 8   | 129971092 | T  | C  | -0.181        | 0.043     | 2.4x10-05     | -0.131      | 0.038   | 5.0x10-04   | -0.153      | 0.028   | 6.5x10-08   |
| rs10824218 | ADK                | 10  | 76091222  | A  | T  | -0.195        | 0.043     | 6.0x10-06     | -0.086      | 0.036   | 1.6x10-02   | -0.131      | 0.028   | 2.0x10-06   |
| rs7103884  | FGF3               | 11  | 69372742  | T  | C  | -0.195        | 0.043     | 7.4x10-06     | -0.09       | 0.035   | 1.1x10-02   | -0.132      | 0.027   | 1.5x10-06   |
| rs421007   | KRT6B              | 12  | 51137112  | G  | T  | -0.115        | 0.043     | 7.5x10-03     | -0.132      | 0.035   | 1.5x10-04   | -0.125      | 0.027   | 3.7x10-06   |
| rs10877809 | FAM19A2            | 12  | 60873839  | A  | G  | -0.134        | 0.048     | 5.5x10-03     | -0.177      | 0.046   | 1.3x10-04   | -0.156      | 0.033   | 2.7x10-06   |
| rs17105278 | RAD51L1            | 14  | 67798232  | C  | T  | -0.122        | 0.049     | 1.3x10-02     | -0.157      | 0.039   | 4.4x10-05   | -0.144      | 0.03    | 2.1x10-06   |
| rs12708948 | IRX5               | 16  | 53635746  | T  | C  | -0.183        | 0.046     | 8.0x10-05     | -0.128      | 0.044   | 3.5x10-03   | -0.154      | 0.032   | 1.4x10-06   |
| rs11860308 | CES8,UNQ440/PRO873 | 16  | 65593020  | C  | T  | -0.238        | 0.082     | 3.8x10-03     | -0.206      | 0.055   | 1.7x10-04   | -0.216      | 0.046   | 2.2x10-06   |
| rs2429369  | HSF5               | 17  | 53856419  | G  | A  | -0.196        | 0.045     | 1.1x10-05     | -0.118      | 0.037   | 1.3x10-03   | -0.15       | 0.028   | 1.4x10-07   |
| rs7502947  | FAM33A             | 17  | 54584498  | A  | G  | -0.182        | 0.045     | 4.4x10-05     | -0.128      | 0.036   | 4.3x10-04   | -0.15       | 0.028   | 1.1x10-07   |
| rs1993104  | FPR1               | 19  | 56932061  | C  | T  | -0.107        | 0.049     | 2.8x10-02     | -0.184      | 0.043   | 1.7x10-05   | -0.151      | 0.032   | 2.8x10-06   |

**Supplementary Table 1: SNPs showing suggestive association in the meta-analysis for ‘age at first tooth’ ( $5 \times 10^{-6} > p > 5 \times 10^{-8}$ ). Variants reported are  $\geq 500$ kb apart. The P-value for each cohort is corrected for gestational age and sex. ALSPAC was also corrected for age at measurement. P-values were calculated using a fixed effects inverse variance meta-analysis. All alleles refer to the forward strand. Positions of SNPs reported correspond to HapMap release II build 36. The effect allele (A1) is defined as the allele associated with earlier tooth eruption**

| SNP        | GENE REGION/LOCUS | CHR | BP        | A1 | A2 | EFFECT ALSPAC | SE ALSPAC | PVALUE ALSPAC | EFFECT NFBC | SE NFBC | PVALUE NFBC | EFFECT META | SE META | PVALUE META |
|------------|-------------------|-----|-----------|----|----|---------------|-----------|---------------|-------------|---------|-------------|-------------|---------|-------------|
| rs6704363  | TMEM9             | 1   | 199363006 | A  | G  | 0.08          | 0.032     | 1.2x10-02     | 0.156       | 0.037   | 2.9x10-05   | 0.111       | 0.024   | 3.8x10-06   |
| rs183780   | EDAR              | 2   | 108961614 | T  | C  | 0.115         | 0.036     | 1.5x10-03     | 0.174       | 0.044   | 7.1x10-05   | 0.139       | 0.028   | 6.3x10-07   |
| rs6967145  | IGF2BP3           | 7   | 23483993  | G  | C  | 0.081         | 0.031     | 9.9x10-03     | 0.179       | 0.038   | 2.3x10-06   | 0.121       | 0.024   | 5.8x10-07   |
| rs2390854  | STK31             | 7   | 23984902  | C  | T  | 0.064         | 0.035     | 6.5x10-02     | 0.234       | 0.043   | 4.7x10-08   | 0.132       | 0.027   | 1.1x10-06   |
| rs11768140 | MPP6              | 7   | 24518518  | A  | G  | 0.119         | 0.038     | 1.7x10-03     | 0.148       | 0.042   | 4.8x10-04   | 0.132       | 0.028   | 3.1x10-06   |
| rs1445570  | PAG1              | 8   | 82002247  | A  | G  | 0.134         | 0.031     | 1.2x10-05     | 0.078       | 0.037   | 3.7x10-02   | 0.111       | 0.024   | 2.6x10-06   |
| rs12379293 | ZCCHC6            | 9   | 88264170  | A  | C  | 0.152         | 0.036     | 1.9x10-05     | 0.103       | 0.042   | 1.4x10-02   | 0.132       | 0.027   | 1.2x10-06   |
| rs451722   | BC093087          | 9   | 89011338  | G  | A  | 0.092         | 0.035     | 7.5x10-03     | 0.159       | 0.04    | 8.7x10-05   | 0.121       | 0.026   | 4.6x10-06   |
| rs7103884  | FGF3              | 11  | 69372742  | T  | C  | 0.178         | 0.031     | 1.0x10-08     | 0.058       | 0.037   | 1.1x10-01   | 0.128       | 0.024   | 6.8x10-08   |
| rs11173690 | FAM19A2           | 12  | 59671837  | C  | G  | 0.142         | 0.039     | 2.4x10-04     | 0.132       | 0.051   | 1.0x10-02   | 0.138       | 0.031   | 7.5x10-06   |
| rs17732182 | PPM1H             | 12  | 61312398  | T  | C  | 0.165         | 0.04      | 3.9x10-05     | 0.202       | 0.058   | 5.6x10-04   | 0.177       | 0.033   | 9.0x10-08   |
| rs7146941  | PAX9              | 14  | 36180966  | A  | C  | 0.1           | 0.032     | 1.9x10-03     | 0.129       | 0.037   | 4.9x10-04   | 0.112       | 0.024   | 3.7x10-06   |
| rs1956529  | RAD51L1           | 14  | 67858677  | C  | T  | 0.079         | 0.032     | 1.3x10-02     | 0.176       | 0.037   | 2.0x10-06   | 0.12        | 0.024   | 6.4x10-07   |
| rs4131946  | AF275804          | 16  | 53419975  | A  | T  | 0.114         | 0.034     | 8.7x10-04     | 0.127       | 0.039   | 1.1x10-03   | 0.12        | 0.026   | 3.1x10-06   |
| rs400688   | SLC25A11          | 17  | 4780674   | G  | A  | 0.137         | 0.04      | 6.3x10-04     | 0.139       | 0.042   | 9.3x10-04   | 0.138       | 0.029   | 2.0x10-06   |
| rs4130668  | DNAH2             | 17  | 7680389   | T  | C  | 0.128         | 0.037     | 6.1x10-04     | 0.133       | 0.038   | 4.1x10-04   | 0.13        | 0.027   | 8.6x10-07   |
| rs2680700  | RNF43             | 17  | 53795541  | T  | G  | 0.122         | 0.032     | 1.1x10-04     | 0.138       | 0.036   | 1.3x10-04   | 0.129       | 0.024   | 5.6x10-08   |
| rs2240899  | FLJ35776,DLGAP1   | 18  | 3585011   | C  | G  | 0.147         | 0.031     | 2.9x10-06     | 0.066       | 0.044   | 1.4x10-01   | 0.12        | 0.026   | 2.8x10-06   |

**Supplementary Table 2: SNPs showing suggestive association in the meta-analysis for ‘number of teeth’ ( $5 \times 10^{-6} > p > 5 \times 10^{-8}$ ). Variants reported are  $\geq 500$ kb apart. The P-value for each cohort is corrected for gestational age and sex. ALSPAC was also corrected for age at measurement. P-values were calculated using a fixed effects inverse variance meta-analysis. All alleles refer to the forward strand. Positions of SNPs reported correspond to HapMap release II build 36. The effect allele (A1) is defined as the allele associated with an increase in the number of teeth.**

|             |                       |                                                    | AGE AT FIRST TOOTH                                             |                                            |                                           | NUMBER OF TEETH                                                |                                            |                                           |
|-------------|-----------------------|----------------------------------------------------|----------------------------------------------------------------|--------------------------------------------|-------------------------------------------|----------------------------------------------------------------|--------------------------------------------|-------------------------------------------|
| PRIMARY SNP | LOCUS                 | SIGNIFICANCE THRESHOLD<br><br>CONDITIONAL ANALYSES | MOST STRONGLY ASSOCIATED SNP AFTER CONDITIONING ON PRIMARY SNP | P VALUE OF SNP BEFORE CONDITIONAL ANALYSIS | P VALUE OF SNP AFTER CONDITIONAL ANALYSIS | MOST STRONGLY ASSOCIATED SNP AFTER CONDITIONING ON PRIMARY SNP | P VALUE OF SNP BEFORE CONDITIONAL ANALYSIS | P VALUE OF SNP AFTER CONDITIONAL ANALYSIS |
| rs8080944   | <i>KCNJ2 KCNJI6</i>   | 4.5x10 <sup>-4</sup>                               | rs11077486                                                     | 6.201x10 <sup>-05</sup>                    | 2.024x10 <sup>-05</sup>                   | rs9788982                                                      | 3.413x10 <sup>-09</sup>                    | 8.103x10 <sup>-07</sup>                   |
| rs11796357  | <i>FAM155E – EDA</i>  | 1.0x10 <sup>-3</sup>                               | rs2520397                                                      | 4.800x10 <sup>-16</sup>                    | 8.449x10 <sup>-06</sup>                   | rs2804391                                                      | 1.254x10 <sup>-06</sup>                    | 9.654x10 <sup>-07</sup>                   |
| rs17563     | <i>BMP4</i>           | 2.5x10 <sup>-4</sup>                               | rs1951867                                                      | 8.000x10 <sup>-03</sup>                    | 8.000x10 <sup>-05</sup>                   | rs1458991                                                      | 7.854x10 <sup>-03</sup>                    | 4.813x10 <sup>-07</sup>                   |
| rs1994969   | <i>IGF2BP1</i>        | 6.5x10 <sup>-4</sup>                               | rs8069452                                                      | 3.588x10 <sup>-06</sup>                    | 8.221x10 <sup>-06</sup>                   | rs9894411                                                      | 9.298x10 <sup>-07</sup>                    | 1.770x10 <sup>-05</sup>                   |
| rs12229918  | <i>MSRB3</i>          | 4.3x10 <sup>-4</sup>                               | rs1870566                                                      | 6.000x10 <sup>-03</sup>                    | 4.000x10 <sup>-03</sup>                   | rs1976274                                                      | 2.348x10 <sup>-09</sup>                    | 1.892x10 <sup>-05</sup>                   |
| rs6568401   | <i>6q21</i>           | 3.8x10 <sup>-4</sup>                               | rs6913299                                                      | 9.000x10 <sup>-03</sup>                    | 4.000x10 <sup>-03</sup>                   | rs3935361                                                      | 2.751x10 <sup>-03</sup>                    | 3.478x10 <sup>-03</sup>                   |
| rs4937076   | <i>CDON</i>           | 3.5x10 <sup>-4</sup>                               | rs533239                                                       | 1.400x10 <sup>-02</sup>                    | 1.100x10 <sup>-02</sup>                   | rs600281                                                       | 4.994x10 <sup>-03</sup>                    | 1.917x10 <sup>-03</sup>                   |
| rs7924176   | <i>ADK VCL AP3M1</i>  | 1.6x10 <sup>-3</sup>                               | rs11597376                                                     | 1.000x10 <sup>-03</sup>                    | 6.000x10 <sup>-03</sup>                   | rs7075347                                                      | 9.271x10 <sup>-03</sup>                    | 7.457x10 <sup>-02</sup>                   |
| rs17101923  | <i>HMGA2</i>          | 4.5x10 <sup>-4</sup>                               | rs1472259                                                      | 1.222x10 <sup>-05</sup>                    | 3.454x10 <sup>-06</sup>                   | rs1472259                                                      | 6.322x10 <sup>-05</sup>                    | 2.228x10 <sup>-05</sup>                   |
| rs10740993  | <i>CACNB2</i>         | 4.9x10 <sup>-4</sup>                               | rs12359352                                                     | 4.159x10 <sup>-07</sup>                    | 6.377x10 <sup>-04</sup>                   | rs7901587                                                      | 3.536x10 <sup>-07</sup>                    | 1.000x10 <sup>-03</sup>                   |
| rs1799922   | <i>CALU/OPN1SW</i>    | 7.7x10 <sup>-4</sup>                               | rs3807306                                                      | 8.848x10 <sup>-07</sup>                    | 1.337x10 <sup>-02</sup>                   | rs339072                                                       | 4.90x10 <sup>-04</sup>                     | 1.600x10 <sup>-02</sup>                   |
| rs10932688  | <i>2q35</i>           | 2.7x10 <sup>-4</sup>                               | rs12474719                                                     | 6.092x10 <sup>-03</sup>                    | 3.627x10 <sup>-03</sup>                   | rs12474719                                                     | 2.839x10 <sup>-05</sup>                    | 1.000x10 <sup>-03</sup>                   |
| rs997154    | <i>AJUBA/C14orf93</i> | 2.5x10 <sup>-4</sup>                               | rs1263663                                                      | 6.064x10 <sup>-03</sup>                    | 5.274x10 <sup>-03</sup>                   | rs178752                                                       | 1.000x10 <sup>-03</sup>                    | 1.000x10 <sup>-03</sup>                   |
| rs9316505   | <i>DLEU7</i>          | 1.1x10 <sup>-4</sup>                               | rs2050936                                                      | 3.062x10 <sup>-03</sup>                    | 8.437x10 <sup>-03</sup>                   | rs2812245                                                      | 2.603x10 <sup>-02</sup>                    | 4.135x10 <sup>-02</sup>                   |
| rs412000    | <i>TEX15/RAD51C</i>   | 7.2x10 <sup>-4</sup>                               | rs3785492                                                      | 4.891x10 <sup>-06</sup>                    | 1.955x10 <sup>-02</sup>                   | rs7215531                                                      | 7.626x10 <sup>-03</sup>                    | 1.238x10 <sup>-03</sup>                   |

**Supplementary Table 3:** Results for the conditional analysis in each genome-wide significant region.

| MARKER            | GENE/LOCUS           | ALLELES     | FREQ1 | EFFECT | STDERR | PVALUE                |
|-------------------|----------------------|-------------|-------|--------|--------|-----------------------|
| <b>rs17101923</b> | <i>HMGA2</i>         | <b>G</b> /T | 0.19  | 0.1281 | 0.0206 | 4.7x10 <sup>-10</sup> |
| <b>rs7924176</b>  | <i>ADK VCL AP3M1</i> | <b>A</b> /G | 0.58  | 0.0937 | 0.0157 | 2.5x10 <sup>-9</sup>  |
| <b>rs10932688</b> | 2q35                 | <b>G</b> /C | 0.72  | 0.0802 | 0.0179 | 7.7x10 <sup>-6</sup>  |
| <b>rs10740993</b> | <i>CACNB2</i>        | <b>C</b> /T | 0.43  | 0.0619 | 0.0155 | 6.6x10 <sup>-5</sup>  |
| <b>rs17563</b>    | <i>BMP4</i>          | <b>G</b> /A | 0.39  | 0.0528 | 0.0162 | 0.0011                |
| <b>rs6568401</b>  | 6q21                 | <b>C</b> /T | 0.74  | 0.0586 | 0.0187 | 0.0017                |
| <b>rs12229918</b> | <i>MSRB3</i>         | <b>C</b> /G | 0.36  | 0.0405 | 0.0162 | 0.0126                |

**Supplementary Table 4:** Results for pleiotropic analysis of genome wide significance  $P < 5 \times 10^{-8}$  in meta-analysis for secondary dentition (Geller et al). All alleles refer to the forward strand. Positions of SNPs reported correspond to HapMap release II build 36. The Increaser allele is defined in bold.

| HEIGHT Stage 1 & 2 |     |           |             |       |        |           | ALSPAC AGE AT FIRST TOOTH |    |        |           | ALSPAC NUMBER OF TEETH |           | NFBC AGE AT FIRST TOOTH |    |        |           | NFBC NUMBER OF TEETH |           | META AGE AT FIRST TOOTH |        |           | META NUMBER OF TEETH |        |           |
|--------------------|-----|-----------|-------------|-------|--------|-----------|---------------------------|----|--------|-----------|------------------------|-----------|-------------------------|----|--------|-----------|----------------------|-----------|-------------------------|--------|-----------|----------------------|--------|-----------|
| SNP                | CHR | POS       | GENE        | A1/A2 | B      | P         | A1                        | A2 | B      | P         | B                      | P         | A1                      | A2 | B      | P         | B                    | P         | A1                      | B      | P         | A1                   | B      | P         |
| rs425277           | 1   | 2059032   | PRKCZ       | T/C   | 0.022  | 2.1x10-08 | C                         | T  | -0.019 | 6.9x10-01 | 0.013                  | 6.9x10-01 | T                       | C  | 0.047  | 2.3x10-01 | 0.024                | 5.4x10-01 | T                       | 0.036  | 2.3x10-01 | C                    | 0.002  | 9.3x10-01 |
| rs2284746          | 1   | 17179262  | MFAP2       | C/G   | -0.04  | 3.9x10-29 | C                         | G  | 0.002  | 9.6x10-01 | -0.001                 | 9.6x10-01 | G                       | C  | 0.023  | 5.2x10-01 | 0.017                | 6.4x10-01 | G                       | -0.013 | 6.4x10-01 | C                    | -0.008 | 7.3x10-01 |
| rs1738475          | 1   | 23409478  | HTR1D       | C/G   | 0.025  | 3.0x10-12 | C                         | G  | -0.012 | 7.8x10-01 | -0.033                 | 2.9x10-01 | G                       | C  | 0.024  | 5.0x10-01 | -0.004               | 9.1x10-01 | C                       | -0.019 | 4.9x10-01 | C                    | -0.018 | 4.5x10-01 |
| rs4601530          | 1   | 24916698  | CLIC4       | T/C   | -0.028 | 2.2x10-12 | C                         | T  | -0.012 | 8.0x10-01 | 0.045                  | 2.0x10-01 | T                       | C  | 0.078  | 3.7x10-02 | -0.054               | 1.7x10-01 | T                       | 0.054  | 7.1x10-02 | T                    | -0.049 | 6.1x10-02 |
| rs7532866          | 1   | 26614131  | LIN28       | A/G   | 0.021  | 3.4x10-08 | A                         | G  | 0.014  | 7.6x10-01 | -0.003                 | 9.3x10-01 | G                       | A  | 0.002  | 9.6x10-01 | -0.010               | 8.0x10-01 | A                       | 0.004  | 8.8x10-01 | G                    | 0.003  | 9.2x10-01 |
| rs2154319          | 1   | 41518357  | SCMH1       | T/C   | -0.03  | 1.8x10-12 | C                         | T  | -0.003 | 9.6x10-01 | -0.005                 | 8.9x10-01 | T                       | C  | -0.032 | 4.9x10-01 | -0.001               | 9.9x10-01 | C                       | -0.016 | 6.3x10-01 | T                    | 0.003  | 9.2x10-01 |
| rs17391694         | 1   | 78396214  | GIP2        | T/C   | 0.042  | 1.7x10-11 | C                         | T  | 0.156  | 9.9x10-03 | -0.069                 | 1.1x10-01 | T                       | C  | -0.012 | 8.7x10-01 | -0.010               | 8.9x10-01 | T                       | -0.096 | 3.8x10-02 | T                    | 0.049  | 1.9x10-01 |
| rs6699417          | 1   | 88896031  | PKN2        | T/C   | 0.021  | 5.0x10-09 | C                         | T  | -0.034 | 4.3x10-01 | 0.048                  | 1.2x10-01 | T                       | C  | 0.017  | 6.4x10-01 | -0.045               | 2.4x10-01 | T                       | 0.024  | 3.8x10-01 | T                    | -0.047 | 5.1x10-02 |
| rs10874746         | 1   | 93096559  | RPL5        | T/C   | -0.024 | 6.7x10-11 | C                         | T  | 0.020  | 6.6x10-01 | 0.065                  | 4.1x10-02 | T                       | C  | 0.108  | 2.5x10-03 | -0.064               | 8.4x10-02 | C                       | 0.058  | 3.8x10-02 | T                    | -0.064 | 7.4x10-03 |
| rs9428104          | 1   | 118657110 | SPAG17      | A/G   | -0.041 | 5.6x10-23 | A                         | G  | -0.012 | 8.1x10-01 | -0.017                 | 6.3x10-01 | G                       | A  | -0.007 | 8.7x10-01 | 0.102                | 1.6x10-02 | A                       | -0.001 | 9.8x10-01 | A                    | -0.051 | 5.7x10-02 |
| rs11205277         | 1   | 148159496 | SF3B4       | A/G   | -0.046 | 4.8x10-32 | A                         | G  | 0.054  | 4.2x10-01 | -0.050                 | 2.9x10-01 | G                       | A  | -0.004 | 9.2x10-01 | -0.008               | 8.4x10-01 | A                       | 0.016  | 6.3x10-01 | A                    | -0.015 | 6.1x10-01 |
| rs17346452         | 1   | 170319910 | DNM3        | T/C   | -0.04  | 1.4x10-23 | C                         | T  | -0.012 | 8.0x10-01 | -0.004                 | 9.0x10-01 | T                       | C  | 0.046  | 2.8x10-01 | 0.011                | 8.0x10-01 | T                       | 0.031  | 3.3x10-01 | T                    | 0.007  | 8.0x10-01 |
| rs1325598          | 1   | 175058872 | PAPPA2      | A/G   | -0.022 | 1.1x10-09 | A                         | G  | 0.101  | 1.8x10-02 | -0.028                 | 3.5x10-01 | G                       | A  | -0.057 | 1.0x10-01 | 0.055                | 1.2x10-01 | A                       | 0.075  | 5.7x10-03 | A                    | -0.040 | 8.9x10-02 |
| rs1046934          | 1   | 182290152 | TSEN15      | A/C   | -0.044 | 2.1x10-31 | A                         | C  | 0.038  | 4.0x10-01 | -0.038                 | 2.4x10-01 | C                       | A  | -0.027 | 4.5x10-01 | -0.013               | 7.3x10-01 | A                       | 0.031  | 2.7x10-01 | A                    | -0.016 | 5.1x10-01 |
| rs10863936         | 1   | 210304421 | DTL         | A/G   | -0.021 | 1.9x10-09 | A                         | G  | -0.051 | 2.3x10-01 | 0.011                  | 7.2x10-01 | G                       | A  | -0.036 | 3.0x10-01 | 0.009                | 8.1x10-01 | G                       | 0.001  | 9.6x10-01 | A                    | 0.003  | 9.1x10-01 |
| rs6684205          | 1   | 216676325 | TGFB2       | A/G   | -0.028 | 1.5x10-12 | A                         | G  | 0.072  | 1.4x10-01 | -0.031                 | 3.8x10-01 | G                       | A  | -0.035 | 3.5x10-01 | -0.029               | 4.7x10-01 | A                       | 0.049  | 1.0x10-01 | A                    | -0.005 | 8.6x10-01 |
| rs11118346         | 1   | 217810342 | LYPLAL1     | T/C   | -0.025 | 1.9x10-12 | C                         | T  | 0.000  | 1.0x10+00 | -0.013                 | 6.6x10-01 | T                       | C  | 0.065  | 6.0x10-02 | -0.026               | 4.6x10-01 | T                       | 0.040  | 1.4x10-01 | C                    | -0.003 | 8.8x10-01 |
| rs10799445         | 1   | 225978506 | JMJD4       | A/C   | 0.032  | 2.4x10-13 | A                         | C  | 0.127  | 1.4x10-02 | -0.067                 | 6.8x10-02 | C                       | A  | 0.013  | 7.3x10-01 | -0.028               | 4.8x10-01 | A                       | 0.037  | 2.3x10-01 | A                    | -0.023 | 3.9x10-01 |
| rs4665736          | 2   | 25041103  | DNAJC27     | T/C   | 0.029  | 7.3x10-16 | C                         | T  | 0.022  | 6.1x10-01 | 0.047                  | 1.3x10-01 | T                       | C  | 0.044  | 2.1x10-01 | -0.016               | 6.6x10-01 | C                       | 0.018  | 5.1x10-01 | T                    | -0.034 | 1.5x10-01 |
| rs6714546          | 2   | 33214929  | LTBP1       | A/G   | -0.026 | 1.6x10-09 | A                         | G  | -0.015 | 7.6x10-01 | -0.008                 | 8.2x10-01 | G                       | A  | -0.025 | 5.5x10-01 | 0.087                | 4.6x10-02 | G                       | 0.007  | 8.1x10-01 | A                    | -0.037 | 1.6x10-01 |
| rs17511102         | 2   | 37814117  | CDC42EP3    | A/T   | -0.06  | 1.6x10-18 | A                         | T  | -0.137 | 1.2x10-01 | 0.007                  | 9.1x10-01 | T                       | A  | -0.040 | 5.6x10-01 | 0.071                | 3.3x10-01 | A                       | -0.029 | 6.0x10-01 | T                    | -0.026 | 5.8x10-01 |
| rs2341459          | 2   | 44621706  | C2orf34     | T/C   | 0.025  | 7.9x10-10 | C                         | T  | 0.002  | 9.6x10-01 | 0.015                  | 6.8x10-01 | T                       | C  | -0.080 | 2.5x10-02 | -0.016               | 6.6x10-01 | T                       | -0.054 | 6.5x10-02 | T                    | -0.015 | 5.5x10-01 |
| rs12474201         | 2   | 46774789  | SOC55       | A/G   | 0.028  | 2.6x10-13 | A                         | G  | -0.026 | 5.7x10-01 | -0.006                 | 8.6x10-01 | G                       | A  | -0.076 | 4.9x10-02 | 0.061                | 1.3x10-01 | G                       | 0.033  | 2.7x10-01 | A                    | -0.027 | 2.8x10-01 |
| rs3791675          | 2   | 55964813  | EFEMP1      | T/C   | -0.053 | 2.5x10-35 | C                         | T  | -0.060 | 2.4x10-01 | 0.052                  | 1.5x10-01 | T                       | C  | 0.014  | 7.3x10-01 | -0.006               | 8.9x10-01 | T                       | 0.032  | 3.2x10-01 | T                    | -0.032 | 2.4x10-01 |
| rs11684404         | 2   | 88705737  | EIF2AK3     | T/C   | -0.028 | 9.9x10-14 | C                         | T  | 0.070  | 1.2x10-01 | -0.077                 | 1.8x10-02 | T                       | C  | -0.005 | 8.8x10-01 | 0.037                | 3.1x10-01 | T                       | -0.030 | 2.8x10-01 | T                    | 0.060  | 1.4x10-02 |
| rs7567288          | 2   | 134151294 | NCKAP5      | T/C   | -0.032 | 2.1x10-12 | C                         | T  | 0.032  | 5.6x10-01 | -0.030                 | 4.5x10-01 | T                       | C  | -0.018 | 6.5x10-01 | -0.037               | 3.6x10-01 | T                       | -0.022 | 4.8x10-01 | C                    | -0.003 | 9.3x10-01 |
| rs7567851          | 2   | 178392966 | PDE11A      | C/G   | 0.037  | 3.3x10-08 | C                         | G  | -0.011 | 8.9x10-01 | 0.053                  | 3.6x10-01 | G                       | C  | -0.063 | 4.0x10-01 | 0.053                | 4.9x10-01 | G                       | 0.029  | 6.0x10-01 | C                    | 0.015  | 7.4x10-01 |
| rs1351164          | 2   | 217980143 | TNS1        | T/C   | 0.034  | 2.1x10-14 | C                         | T  | -0.039 | 4.8x10-01 | 0.038                  | 3.2x10-01 | T                       | C  | 0.096  | 1.5x10-02 | -0.003               | 9.3x10-01 | T                       | 0.076  | 1.7x10-02 | T                    | -0.022 | 4.4x10-01 |
| rs12470505         | 2   | 219616613 | CCDC108/1HH | T/G   | 0.041  | 8.9x10-12 | G                         | T  | -0.089 | 2.1x10-01 | 0.007                  | 8.9x10-01 | T                       | G  | 0.045  | 4.8x10-01 | 0.000                | 1.0x10+00 | T                       | 0.065  | 1.7x10-01 | T                    | -0.004 | 9.2x10-01 |
| rs2629046          | 2   | 224755988 | SERPINE2    | T/C   | 0.024  | 7.9x10-12 | C                         | T  | -0.139 | 1.3x10-03 | 0.041                  | 1.8x10-01 | T                       | C  | 0.029  | 4.0x10-01 | 0.023                | 5.2x10-01 | T                       | 0.072  | 7.9x10-03 | T                    | -0.014 | 5.6x10-01 |
| rs2580816          | 2   | 232506210 | NPPC        | T/C   | -0.045 | 5.8x10-22 | C                         | T  | 0.022  | 6.9x10-01 | -0.004                 | 9.3x10-01 | T                       | C  | -0.059 | 2.6x10-01 | 0.082                | 1.3x10-01 | T                       | -0.041 | 2.7x10-01 | T                    | 0.030  | 3.4x10-01 |
| rs12694997         | 2   | 241911659 | "SEPT2"     | A/G   | -0.024 | 1.2x10-08 | A                         | G  | 0.012  | 8.2x10-01 | -0.028                 | 4.5x10-01 | G                       | A  | -0.041 | 3.2x10-01 | -0.008               | 8.5x10-01 | A                       | 0.030  | 3.6x10-01 | A                    | -0.013 | 6.5x10-01 |
| rs2597513          | 3   | 13530836  | HDAC11      | T/C   | -0.036 | 7.4x10-10 | C                         | T  | 0.056  | 4.2x10-01 | 0.035                  | 4.8x10-01 | T                       | C  | -0.085 | 1.9x10-01 | 0.037                | 5.9x10-01 | T                       | -0.072 | 1.3x10-01 | T                    | -0.010 | 8.0x10-01 |
| rs13088462         | 3   | 51046753  | DOCK3       | T/C   | -0.052 | 3.8x10-10 | C                         | T  | -0.110 | 2.6x10-01 | 0.119                  | 8.3x10-02 | T                       | C  | 0.117  | 1.2x10-01 | -0.065               | 4.1x10-01 | T                       | 0.115  | 5.4x10-02 | T                    | -0.095 | 6.4x10-02 |

|            |   |           |                 |     |        |           |   |   |        |           |        |           |   |   |        |           |        |           |   |        |           |   |        |           |
|------------|---|-----------|-----------------|-----|--------|-----------|---|---|--------|-----------|--------|-----------|---|---|--------|-----------|--------|-----------|---|--------|-----------|---|--------|-----------|
| rs2336725  | 3 | 53093779  | RTF1            | T/C | -0.027 | 9.7x10-13 | C | T | 0.040  | 3.5x10-01 | 0.010  | 7.4x10-01 | T | C | 0.025  | 5.1x10-01 | 0.021  | 6.1x10-01 | T | -0.003 | 9.1x10-01 | C | 0.001  | 9.5x10-01 |
| rs9835332  | 3 | 56642722  | C3orf63         | C/G | -0.026 | 5.3x10-13 | C | G | -0.028 | 5.1x10-01 | 0.028  | 3.5x10-01 | G | C | 0.020  | 5.7x10-01 | -0.053 | 1.4x10-01 | C | -0.023 | 3.9x10-01 | C | 0.039  | 9.6x10-02 |
| rs17806888 | 3 | 67499012  | SUCLG2          | T/C | 0.036  | 2.1x10-09 | C | T | 0.046  | 4.8x10-01 | 0.000  | 1.0x10+00 | T | C | -0.118 | 2.1x10-01 | 0.056  | 5.7x10-01 | T | -0.070 | 1.9x10-01 | C | 0.010  | 8.1x10-01 |
| rs9863706  | 3 | 72520103  | RYBP            | T/C | -0.031 | 4.1x10-13 | C | T | 0.033  | 5.3x10-01 | -0.020 | 5.9x10-01 | T | C | 0.019  | 6.7x10-01 | -0.010 | 8.3x10-01 | T | -0.004 | 9.2x10-01 | T | 0.009  | 7.7x10-01 |
| rs6439167  | 3 | 130533446 | C3orf47         | T/C | -0.034 | 8.9x10-15 | C | T | -0.049 | 3.4x10-01 | 0.028  | 4.5x10-01 | T | C | 0.030  | 5.1x10-01 | -0.017 | 7.3x10-01 | T | 0.038  | 2.6x10-01 | T | -0.024 | 4.2x10-01 |
| rs9844666  | 3 | 137456906 | PCCB            | A/G | -0.024 | 3.5x10-09 | A | G | 0.024  | 6.2x10-01 | -0.022 | 5.3x10-01 | G | A | -0.036 | 3.8x10-01 | -0.022 | 6.1x10-01 | A | 0.031  | 3.3x10-01 | A | -0.005 | 8.6x10-01 |
| rs724016   | 3 | 142588260 | ZBTB38          | A/G | -0.07  | 3.1x10-86 | A | G | -0.009 | 8.4x10-01 | -0.028 | 3.6x10-01 | G | A | 0.015  | 6.7x10-01 | 0.039  | 2.8x10-01 | A | -0.013 | 6.5x10-01 | A | -0.033 | 1.6x10-01 |
| rs572169   | 3 | 173648421 | GHSR            | T/C | 0.033  | 2.8x10-18 | C | T | -0.076 | 1.0x10-01 | 0.088  | 7.7x10-03 | T | C | -0.058 | 1.2x10-01 | 0.017  | 6.6x10-01 | C | -0.006 | 8.3x10-01 | T | -0.043 | 8.6x10-02 |
| rs720390   | 3 | 187031377 | IGF2BP2         | A/G | 0.029  | 1.9x10-14 | A | G | -0.012 | 7.9x10-01 | -0.016 | 6.1x10-01 | G | A | 0.017  | 6.4x10-01 | -0.005 | 9.0x10-01 | A | -0.015 | 5.9x10-01 | A | -0.008 | 7.6x10-01 |
| rs2247341  | 4 | 1671115   | SLBP/FGFR3      | A/G | 0.025  | 1.5x10-11 | A | G | -0.050 | 2.7x10-01 | 0.031  | 3.5x10-01 | G | A | -0.045 | 2.0x10-01 | 0.034  | 3.6x10-01 | G | 0.010  | 7.2x10-01 | A | 0.002  | 9.3x10-01 |
| rs6449353  | 4 | 17642586  | LCORL           | T/C | 0.075  | 7.1x10-46 | C | T | -0.067 | 2.9x10-01 | -0.008 | 8.6x10-01 | T | C | -0.050 | 4.0x10-01 | 0.025  | 6.8x10-01 | T | 0.005  | 9.0x10-01 | T | 0.014  | 7.0x10-01 |
| rs17081935 | 4 | 57518233  | POLR2B          | T/C | 0.03   | 3.7x10-11 | C | T | 0.002  | 9.8x10-01 | 0.022  | 5.8x10-01 | T | C | 0.077  | 6.1x10-02 | -0.051 | 2.3x10-01 | C | 0.049  | 1.4x10-01 | T | -0.035 | 2.2x10-01 |
| rs7697556  | 4 | 73734177  | ADAMTS3         | T/C | 0.028  | 2.0x10-14 | C | T | 0.009  | 8.4x10-01 | 0.028  | 3.6x10-01 | T | C | 0.029  | 4.2x10-01 | -0.076 | 3.7x10-02 | C | 0.014  | 6.2x10-01 | T | -0.048 | 4.1x10-02 |
| rs788867   | 4 | 82369030  | PRKG2/BMP3      | T/G | -0.043 | 8.9x10-28 | G | T | 0.063  | 1.8x10-01 | -0.045 | 1.7x10-01 | T | G | 0.056  | 1.2x10-01 | -0.018 | 6.4x10-01 | G | 0.012  | 6.9x10-01 | T | 0.018  | 4.8x10-01 |
| rs10010325 | 4 | 106325802 | TET2            | A/C | 0.024  | 3.9x10-11 | A | C | 0.017  | 6.9x10-01 | -0.036 | 2.3x10-01 | C | A | -0.003 | 9.2x10-01 | 0.043  | 2.4x10-01 | A | 0.009  | 7.4x10-01 | A | -0.039 | 9.2x10-02 |
| rs7689420  | 4 | 145787802 | HHIP            | T/C | -0.073 | 6.2x10-51 | C | T | 0.022  | 7.0x10-01 | -0.051 | 2.1x10-01 | T | C | -0.076 | 9.0x10-02 | 0.057  | 2.3x10-01 | T | -0.055 | 1.2x10-01 | T | 0.054  | 8.1x10-02 |
| rs955748   | 4 | 184452669 | WWC2            | A/G | -0.023 | 4.4x10-08 | A | G | -0.002 | 9.7x10-01 | -0.032 | 3.6x10-01 | G | A | 0.037  | 3.6x10-01 | -0.029 | 4.8x10-01 | A | -0.023 | 4.7x10-01 | A | -0.007 | 8.0x10-01 |
| rs1173727  | 5 | 32866278  | NPR3            | T/C | 0.034  | 1.6x10-21 | C | T | 0.034  | 4.4x10-01 | -0.037 | 2.4x10-01 | T | C | 0.021  | 5.4x10-01 | -0.035 | 3.4x10-01 | T | 0.000  | 9.9x10-01 | T | 0.007  | 7.7x10-01 |
| rs11958779 | 5 | 55037656  | SLC38A9         | A/G | -0.027 | 1.8x10-12 | A | G | -0.014 | 7.7x10-01 | -0.003 | 9.2x10-01 | G | A | -0.029 | 4.3x10-01 | 0.056  | 1.5x10-01 | G | 0.013  | 6.6x10-01 | A | -0.026 | 3.1x10-01 |
| rs10037512 | 5 | 88390431  | MEF2C           | T/C | 0.032  | 2.0x10-18 | C | T | 0.027  | 5.3x10-01 | -0.012 | 7.0x10-01 | T | C | 0.038  | 2.8x10-01 | 0.021  | 5.7x10-01 | C | 0.012  | 6.7x10-01 | T | 0.016  | 5.1x10-01 |
| rs13177718 | 5 | 108141243 | FER             | T/C | -0.04  | 3.0x10-08 | C | T | 0.022  | 7.9x10-01 | 0.057  | 3.3x10-01 | T | C | 0.081  | 3.1x10-01 | -0.007 | 9.3x10-01 | C | 0.031  | 6.0x10-01 | T | -0.040 | 3.9x10-01 |
| rs1582931  | 5 | 122685098 | CEP120          | A/G | -0.023 | 1.5x10-10 | A | G | -0.064 | 1.6x10-01 | 0.051  | 1.1x10-01 | G | A | 0.057  | 1.2x10-01 | -0.066 | 8.0x10-02 | A | -0.060 | 3.5x10-02 | A | 0.058  | 1.9x10-02 |
| rs274546   | 5 | 131727766 | SLC22A5         | A/G | -0.029 | 7.3x10-16 | A | G | -0.013 | 7.7x10-01 | 0.032  | 3.1x10-01 | G | A | -0.037 | 2.9x10-01 | 0.005  | 8.9x10-01 | G | 0.018  | 5.2x10-01 | A | 0.016  | 5.0x10-01 |
| rs526896   | 5 | 134384604 | PITX1           | T/G | 0.03   | 2.3x10-13 | G | T | -0.017 | 7.4x10-01 | -0.035 | 3.3x10-01 | T | G | -0.048 | 2.5x10-01 | 0.034  | 4.3x10-01 | G | -0.022 | 5.0x10-01 | T | 0.035  | 2.1x10-01 |
| rs4282339  | 5 | 168188818 | SLIT3           | A/G | -0.036 | 6.6x10-16 | A | G | -0.018 | 7.3x10-01 | 0.024  | 5.2x10-01 | G | A | -0.021 | 6.2x10-01 | -0.028 | 5.3x10-01 | G | 0.005  | 8.7x10-01 | A | 0.026  | 3.7x10-01 |
| rs12153391 | 5 | 171136043 | FBXW11          | A/C | -0.03  | 3.6x10-12 | A | C | -0.043 | 3.9x10-01 | 0.025  | 5.0x10-01 | C | A | 0.096  | 1.6x10-02 | -0.077 | 6.4x10-02 | A | -0.076 | 1.6x10-02 | A | 0.047  | 8.4x10-02 |
| rs889014   | 5 | 172916720 | BOD1            | T/C | -0.03  | 9.4x10-16 | C | T | -0.054 | 2.3x10-01 | 0.002  | 9.6x10-01 | T | C | 0.038  | 2.8x10-01 | 0.033  | 3.6x10-01 | T | 0.044  | 1.1x10-01 | C | 0.014  | 5.7x10-01 |
| rs422421   | 5 | 176449932 | FGFR4/NSD1      | T/C | -0.031 | 1.1x10-12 | C | T | -0.035 | 5.0x10-01 | -0.021 | 5.7x10-01 | T | C | -0.009 | 8.5x10-01 | 0.049  | 3.3x10-01 | T | 0.011  | 7.6x10-01 | T | 0.031  | 3.0x10-01 |
| rs6879260  | 5 | 179663620 | GFPT2           | T/C | -0.022 | 1.6x10-09 | C | T | 0.003  | 9.4x10-01 | 0.069  | 2.8x10-02 | T | C | 0.035  | 3.1x10-01 | -0.015 | 6.8x10-01 | C | 0.021  | 4.5x10-01 | T | -0.046 | 5.3x10-02 |
| rs3812163  | 6 | 7670759   | BMP6            | A/T | -0.036 | 1.2x10-23 | A | T | -0.018 | 6.8x10-01 | 0.046  | 1.3x10-01 | T | A | -0.051 | 1.4x10-01 | 0.059  | 1.0x10-01 | T | 0.024  | 3.8x10-01 | A | 0.002  | 9.3x10-01 |
| rs1047014  | 6 | 19949472  | ID4             | T/C | -0.032 | 1.8x10-13 | C | T | 0.058  | 2.4x10-01 | 0.015  | 6.6x10-01 | T | C | 0.009  | 8.4x10-01 | -0.021 | 6.4x10-01 | T | -0.019 | 5.5x10-01 | T | -0.018 | 5.2x10-01 |
| rs806794   | 6 | 26308656  | Histone cluster | A/G | 0.052  | 1.2x10-39 | A | G | 0.097  | 4.7x10-02 | -0.029 | 4.0x10-01 | G | A | 0.017  | 6.2x10-01 | -0.053 | 1.4x10-01 | A | 0.025  | 2.8x10-02 | G | 0.011  | 2.5x10-02 |
| rs3129109  | 6 | 29192211  | OR2J3           | T/C | -0.032 | 2.4x10-17 | C | T | 0.015  | 7.4x10-01 | -0.037 | 2.5x10-01 | T | C | 0.021  | 5.6x10-01 | -0.045 | 2.3x10-01 | C | 0.007  | 8.1x10-01 | T | 0.003  | 9.1x10-01 |
| rs2256183  | 6 | 31488508  | MICA            | A/G | 0.04   | 7.8x10-29 | A | G | 0.003  | 9.4x10-01 | -0.012 | 6.9x10-01 | G | A | -0.047 | 1.8x10-01 | 0.077  | 3.6x10-02 | A | 0.030  | 2.8x10-01 | A | -0.039 | 9.8x10-02 |
| rs6457620  | 6 | 32771977  | HLA locus       | C/G | -0.029 | 2.1x10-16 | C | G | 0.062  | 1.4x10-01 | -0.028 | 3.5x10-01 | G | C | -0.025 | 4.8x10-01 | 0.020  | 5.9x10-01 | C | 0.040  | 2.7x10-02 | C | -0.025 | 2.3x10-02 |
| rs2780226  | 6 | 34307070  | HMG1            | T/C | -0.076 | 8.1x10-28 | C | T | 0.097  | 2.0x10-01 | 0.012  | 8.2x10-01 | T | C | -0.019 | 8.1x10-01 | 0.046  | 5.7x10-01 | T | -0.058 | 2.8x10-01 | C | 0.006  | 8.9x10-01 |
| rs6457821  | 6 | 35510783  | PPARD/FANCE     | A/C | -0.104 | 2.1x10-12 | A | C | 0.012  | 9.4x10-01 | 0.051  | 6.4x10-01 | - | - | -      | -         | -      | -         | A | 0.012  | 9.4x10-01 | A | 0.051  | 6.4x10-01 |

|            |   |           |             |     |        |           |   |   |        |           |        |           |   |   |        |           |        |           |   |        |           |   |        |           |
|------------|---|-----------|-------------|-----|--------|-----------|---|---|--------|-----------|--------|-----------|---|---|--------|-----------|--------|-----------|---|--------|-----------|---|--------|-----------|
| rs310405   | 6 | 81857081  | FAM46A      | A/G | 0.026  | 2.2x10-13 | A | G | 0.010  | 8.1x10-01 | -0.018 | 5.6x10-01 | G | A | -0.019 | 6.0x10-01 | 0.046  | 2.2x10-01 | A | 0.015  | 5.8x10-01 | A | -0.029 | 2.2x10-01 |
| rs7759938  | 6 | 105485647 | LIN28B      | T/C | -0.045 | 8.3x10-31 | C | T | 0.027  | 5.7x10-01 | 0.004  | 8.9x10-01 | T | C | -0.062 | 9.1x10-02 | 0.010  | 8.0x10-01 | T | -0.048 | 9.3x10-02 | C | 0.002  | 9.4x10-01 |
| rs1046943  | 6 | 109890634 | ZBTB24      | A/G | 0.02   | 2.5x10-08 | A | G | 0.053  | 2.3x10-01 | -0.042 | 1.8x10-01 | G | A | -0.003 | 9.4x10-01 | -0.007 | 8.5x10-01 | A | 0.022  | 4.2x10-01 | G | -0.021 | 3.7x10-01 |
| rs961764   | 6 | 117628849 | VGLL2       | C/G | -0.024 | 1.3x10-11 | C | G | -0.117 | 6.7x10-03 | 0.080  | 9.8x10-03 | G | C | 0.011  | 7.6x10-01 | 0.034  | 3.6x10-01 | C | -0.053 | 5.1x10-02 | C | 0.033  | 1.7x10-01 |
| rs1490384  | 6 | 126892853 | C6orf173    | T/C | 0.034  | 3.9x10-21 | C | T | 0.235  | 3.6x10-08 | -0.035 | 2.4x10-01 | T | C | -0.083 | 1.8x10-02 | 0.036  | 3.2x10-01 | T | -0.144 | 1.0x10-07 | T | 0.036  | 1.2x10-01 |
| rs6569648  | 6 | 130390812 | L3MBTL3     | T/C | -0.04  | 1.1x10-21 | C | T | 0.115  | 2.1x10-02 | -0.033 | 3.5x10-01 | T | C | -0.054 | 2.0x10-01 | -0.009 | 8.3x10-01 | T | -0.080 | 1.4x10-02 | T | 0.016  | 5.6x10-01 |
| rs7763064  | 6 | 142838982 | GPR126      | A/G | -0.048 | 1.1x10-33 | A | G | -0.047 | 3.2x10-01 | 0.032  | 3.5x10-01 | G | A | 0.048  | 2.4x10-01 | -0.100 | 1.7x10-02 | A | -0.047 | 1.2x10-01 | A | 0.058  | 2.6x10-02 |
| rs543650   | 6 | 152152636 | ESR1        | T/G | -0.034 | 1.2x10-17 | G | T | -0.022 | 6.2x10-01 | 0.006  | 8.6x10-01 | T | G | 0.017  | 6.3x10-01 | -0.013 | 7.1x10-01 | T | 0.019  | 4.9x10-01 | T | -0.009 | 7.0x10-01 |
| rs9456307  | 6 | 158849430 | TULP4       | A/T | -0.048 | 2.2x10-09 | A | T | 0.155  | 7.9x10-02 | -0.079 | 2.1x10-01 | T | A | -0.086 | 4.8x10-01 | 0.068  | 5.9x10-01 | A | 0.131  | 6.6x10-02 | A | -0.077 | 1.7x10-01 |
| rs798489   | 7 | 2768329   | GNA12       | T/C | -0.048 | 1.9x10-33 | C | T | 0.018  | 7.1x10-01 | -0.048 | 1.6x10-01 | T | C | 0.022  | 5.6x10-01 | 0.028  | 4.7x10-01 | C | 0.007  | 8.1x10-01 | T | 0.039  | 1.3x10-01 |
| rs4470914  | 7 | 19583047  | TWISTNB     | T/C | 0.029  | 9.2x10-10 | C | T | 0.007  | 8.9x10-01 | 0.020  | 6.0x10-01 | T | C | 0.072  | 1.6x10-01 | -0.074 | 1.6x10-01 | C | 0.034  | 3.5x10-01 | T | -0.038 | 2.1x10-01 |
| rs12534093 | 7 | 23469499  | IGF2BP3     | A/T | -0.034 | 2.0x10-14 | A | T | 0.103  | 4.7x10-02 | -0.094 | 9.8x10-03 | T | A | -0.100 | 2.3x10-02 | 0.159  | 4.8x10-04 | A | 0.101  | 2.6x10-03 | A | -0.120 | 2.7x10-05 |
| rs1708299  | 7 | 28156471  | JAZF1       | A/G | 0.04   | 5.8x10-25 | A | G | 0.019  | 6.8x10-01 | 0.000  | 9.9x10-01 | G | A | -0.057 | 1.3x10-01 | 0.014  | 7.2x10-01 | A | 0.043  | 1.5x10-01 | A | -0.006 | 8.1x10-01 |
| rs6959212  | 7 | 38094851  | STARD3NL    | T/C | -0.024 | 1.6x10-09 | C | T | -0.011 | 8.0x10-01 | 0.000  | 1.0x10+00 | T | C | 0.015  | 7.2x10-01 | 0.036  | 4.0x10-01 | T | 0.013  | 6.7x10-01 | C | 0.013  | 6.1x10-01 |
| rs42235    | 7 | 92086012  | CDK6        | T/C | 0.057  | 7.7x10-47 | C | T | 0.012  | 7.9x10-01 | 0.067  | 4.7x10-02 | T | C | -0.033 | 4.1x10-01 | -0.076 | 7.0x10-02 | T | -0.025 | 4.3x10-01 | T | -0.070 | 7.2x10-03 |
| rs822552   | 7 | 148281567 | PDIA4       | C/G | -0.025 | 2.6x10-08 | C | G | 0.010  | 8.5x10-01 | -0.036 | 3.6x10-01 | G | C | -0.028 | 5.6x10-01 | 0.051  | 2.9x10-01 | C | 0.020  | 5.7x10-01 | C | -0.042 | 1.7x10-01 |
| rs2110001  | 7 | 150147955 | TMEM176A    | C/G | -0.031 | 3.3x10-13 | C | G | -0.009 | 8.5x10-01 | 0.016  | 6.4x10-01 | G | C | 0.002  | 9.6x10-01 | -0.025 | 5.3x10-01 | C | -0.005 | 8.7x10-01 | C | 0.020  | 4.5x10-01 |
| rs1013209  | 8 | 24172249  | ADAM28      | T/C | -0.025 | 1.6x10-09 | C | T | 0.009  | 8.6x10-01 | -0.023 | 5.3x10-01 | T | C | -0.004 | 9.1x10-01 | 0.031  | 4.3x10-01 | T | -0.006 | 8.5x10-01 | T | 0.027  | 3.2x10-01 |
| rs7460090  | 8 | 57356717  | SDR16C5     | T/C | 0.058  | 8.2x10-27 | C | T | 0.034  | 6.1x10-01 | -0.074 | 1.1x10-01 | T | C | -0.076 | 1.3x10-01 | 0.098  | 6.7x10-02 | T | -0.061 | 1.3x10-01 | T | 0.084  | 1.7x10-02 |
| rs6473015  | 8 | 78341040  | PEX2        | A/C | -0.029 | 6.9x10-13 | A | C | 0.044  | 3.5x10-01 | -0.026 | 4.4x10-01 | C | A | 0.058  | 1.7x10-01 | -0.075 | 8.9x10-02 | C | -0.013 | 6.9x10-01 | C | 0.011  | 6.7x10-01 |
| rs6470764  | 8 | 130794847 | GSDMC       | T/C | -0.05  | 1.7x10-28 | C | T | -0.124 | 2.0x10-02 | 0.125  | 8.0x10-04 | T | C | -0.032 | 5.5x10-01 | 0.002  | 9.7x10-01 | T | 0.047  | 2.1x10-01 | T | -0.086 | 5.8x10-03 |
| rs12680655 | 8 | 135706519 | ZFAT        | C/G | 0.028  | 1.6x10-14 | C | G | 0.031  | 4.8x10-01 | 0.003  | 9.2x10-01 | G | C | -0.008 | 8.1x10-01 | 0.070  | 5.1x10-02 | C | 0.017  | 5.3x10-01 | G | -0.028 | 2.3x10-01 |
| rs7864648  | 9 | 16358732  | BNC2        | T/G | 0.022  | 2.1x10-08 | G | T | 0.026  | 6.1x10-01 | -0.012 | 7.3x10-01 | T | G | -0.030 | 4.2x10-01 | 0.033  | 3.9x10-01 | T | -0.028 | 3.4x10-01 | T | 0.022  | 4.0x10-01 |
| rs11144688 | 9 | 77732106  | PCSK5       | A/G | -0.049 | 9.6x10-12 | A | G | -0.074 | 5.0x10-01 | 0.008  | 9.2x10-01 | G | A | 0.061  | 4.9x10-01 | 0.113  | 2.1x10-01 | A | -0.066 | 3.4x10-01 | G | -0.044 | 4.6x10-01 |
| rs7853377  | 9 | 85742025  | C9orf64     | A/G | -0.024 | 4.5x10-08 | A | G | 0.006  | 9.1x10-01 | -0.050 | 1.9x10-01 | G | A | 0.063  | 1.6x10-01 | -0.072 | 1.2x10-01 | G | -0.034 | 3.2x10-01 | A | -0.002 | 9.6x10-01 |
| rs8181166  | 9 | 88306448  | ZCCHC6      | C/G | 0.026  | 2.7x10-12 | C | G | -0.034 | 4.3x10-01 | 0.078  | 1.2x10-02 | G | C | 0.039  | 2.7x10-01 | -0.084 | 2.2x10-02 | C | -0.037 | 1.8x10-01 | C | 0.080  | 7.0x10-04 |
| rs2778031  | 9 | 90025546  | SPIN1       | T/C | 0.031  | 9.0x10-13 | C | T | 0.068  | 1.8x10-01 | 0.031  | 3.9x10-01 | T | C | 0.085  | 6.4x10-02 | -0.015 | 7.5x10-01 | C | 0.016  | 6.4x10-01 | T | -0.025 | 3.8x10-01 |
| rs9969804  | 9 | 94468941  | IPPK        | A/C | 0.03   | 7.7x10-17 | A | C | 0.023  | 6.0x10-01 | 0.011  | 7.1x10-01 | C | A | 0.038  | 2.7x10-01 | -0.027 | 4.4x10-01 | C | -0.014 | 5.9x10-01 | A | 0.018  | 4.3x10-01 |
| rs1257763  | 9 | 95933766  | PTPDC1      | A/G | 0.069  | 9.9x10-10 | A | G | -0.075 | 5.8x10-01 | 0.022  | 8.2x10-01 | G | A | 0.165  | 1.8x10-01 | -0.110 | 4.0x10-01 | A | -0.124 | 1.7x10-01 | A | 0.053  | 5.0x10-01 |
| rs473902   | 9 | 97296056  | PTCH1/FANCC | T/G | 0.065  | 2.3x10-17 | G | T | -0.033 | 7.5x10-01 | 0.012  | 8.7x10-01 | T | G | 0.077  | 2.8x10-01 | -0.015 | 8.4x10-01 | T | 0.063  | 2.9x10-01 | T | -0.014 | 8.0x10-01 |
| rs7027110  | 9 | 108638867 | ZNF462      | A/G | 0.031  | 2.3x10-13 | A | G | 0.030  | 5.5x10-01 | 0.031  | 3.9x10-01 | G | A | -0.130 | 2.3x10-03 | 0.073  | 9.8x10-02 | A | 0.088  | 6.8x10-03 | G | -0.010 | 7.2x10-01 |
| rs1468758  | 9 | 112846903 | LPAR1       | T/C | -0.026 | 1.4x10-09 | C | T | 0.036  | 4.7x10-01 | -0.048 | 1.8x10-01 | T | C | -0.040 | 3.4x10-01 | 0.004  | 9.3x10-01 | T | -0.039 | 2.3x10-01 | T | 0.030  | 2.7x10-01 |
| rs751543   | 9 | 118162163 | PAPPA       | T/C | 0.026  | 6.5x10-10 | C | T | 0.066  | 2.0x10-01 | -0.025 | 5.0x10-01 | T | C | 0.036  | 3.9x10-01 | 0.027  | 5.4x10-01 | T | -0.005 | 8.8x10-01 | T | 0.026  | 3.6x10-01 |

|            |    |           |                |     |        |           |   |   |        |           |        |           |   |   |        |           |        |           |   |        |           |   |        |           |
|------------|----|-----------|----------------|-----|--------|-----------|---|---|--------|-----------|--------|-----------|---|---|--------|-----------|--------|-----------|---|--------|-----------|---|--------|-----------|
| rs11599750 | 10 | 101795432 | CPN1           | T/C | -0.028 | 1.6x10-13 | C | T | -0.022 | 6.1x10-01 | 0.011  | 7.2x10-01 | T | C | -0.016 | 6.8x10-01 | -0.002 | 9.5x10-01 | T | 0.001  | 9.8x10-01 | T | -0.008 | 7.5x10-01 |
| rs2237886  | 11 | 2767307   | KCNQ1          | T/C | 0.046  | 2.2x10-13 | C | T | 0.044  | 5.3x10-01 | -0.032 | 5.2x10-01 | T | C | -0.078 | 2.2x10-01 | 0.129  | 5.1x10-02 | T | -0.062 | 1.9x10-01 | T | 0.068  | 9.0x10-02 |
| rs7926971  | 11 | 12654616  | TEAD1          | A/G | -0.023 | 4.4x10-10 | A | G | 0.011  | 7.9x10-01 | -0.006 | 8.5x10-01 | G | A | -0.033 | 3.4x10-01 | -0.004 | 9.2x10-01 | A | 0.024  | 3.7x10-01 | A | -0.002 | 9.4x10-01 |
| rs1330     | 11 | 17272605  | NUCB2          | T/C | 0.022  | 4.9x10-09 | C | T | 0.044  | 3.2x10-01 | 0.001  | 9.8x10-01 | T | C | 0.043  | 2.5x10-01 | -0.027 | 4.8x10-01 | C | 0.008  | 7.9x10-01 | T | -0.012 | 6.4x10-01 |
| rs10838801 | 11 | 48054856  | PTPRJ/SLC39A13 | A/G | -0.027 | 3.5x10-12 | A | G | -0.009 | 8.5x10-01 | -0.013 | 6.9x10-01 | G | A | -0.049 | 2.0x10-01 | 0.009  | 8.3x10-01 | G | 0.026  | 3.8x10-01 | A | -0.011 | 6.5x10-01 |
| rs1814175  | 11 | 49515748  | FOLH1          | T/C | 0.022  | 1.6x10-08 | C | T | 0.012  | 7.9x10-01 | 0.014  | 6.7x10-01 | T | C | -0.021 | 5.6x10-01 | -0.001 | 9.8x10-01 | T | -0.018 | 5.3x10-01 | T | -0.008 | 7.3x10-01 |
| rs5017948  | 11 | 51270794  | OR4A5          | A/T | 0.027  | 3.1x10-08 | A | T | -0.062 | 2.6x10-01 | 0.018  | 6.5x10-01 | T | A | 0.081  | 9.6x10-02 | 0.010  | 8.4x10-01 | A | -0.073 | 4.7x10-02 | A | 0.007  | 8.2x10-01 |
| rs3782089  | 11 | 65093395  | SSSCA1         | T/C | -0.058 | 3.6x10-13 | C | T | -0.050 | 5.5x10-01 | 0.064  | 2.8x10-01 | T | C | -0.139 | 5.2x10-02 | 0.032  | 6.7x10-01 | C | -0.058 | 2.8x10-01 | T | -0.027 | 5.6x10-01 |
| rs7112925  | 11 | 66582736  | RHOD           | T/C | -0.023 | 9.0x10-10 | C | T | 0.000  | 1.0x10+00 | 0.033  | 3.0x10-01 | T | C | 0.004  | 9.2x10-01 | 0.007  | 8.6x10-01 | C | 0.002  | 9.4x10-01 | T | -0.017 | 4.8x10-01 |
| rs634552   | 11 | 74959700  | SERPINH1       | T/G | 0.039  | 3.5x10-13 | G | T | -0.190 | 2.6x10-03 | 0.071  | 1.1x10-01 | T | G | -0.029 | 5.3x10-01 | 0.011  | 8.2x10-01 | T | 0.046  | 2.1x10-01 | T | -0.032 | 3.2x10-01 |
| rs494459   | 11 | 118079885 | TREH           | T/C | 0.02   | 1.7x10-08 | C | T | 0.085  | 5.1x10-02 | -0.020 | 5.3x10-01 | T | C | 0.029  | 4.1x10-01 | -0.022 | 5.4x10-01 | T | -0.016 | 5.6x10-01 | T | 0.002  | 9.4x10-01 |
| rs654723   | 11 | 128091365 | FLI1           | A/C | 0.025  | 3.6x10-11 | A | C | 0.107  | 1.8x10-02 | -0.041 | 2.0x10-01 | C | A | -0.031 | 4.3x10-01 | 0.007  | 8.6x10-01 | A | 0.063  | 3.2x10-02 | A | -0.028 | 2.7x10-01 |
| rs2856321  | 12 | 11747040  | ETV6           | A/G | -0.029 | 4.5x10-15 | A | G | -0.038 | 3.9x10-01 | 0.039  | 2.2x10-01 | G | A | 0.013  | 7.1x10-01 | -0.040 | 2.8x10-01 | A | -0.023 | 4.1x10-01 | A | 0.040  | 1.0x10-01 |
| rs10770705 | 12 | 20748734  | SLCO1C1        | A/C | 0.033  | 8.0x10-18 | A | C | 0.004  | 9.4x10-01 | -0.004 | 9.1x10-01 | C | A | -0.041 | 2.9x10-01 | 0.062  | 1.2x10-01 | A | 0.026  | 3.9x10-01 | A | -0.027 | 2.8x10-01 |
| rs2638953  | 12 | 28425682  | CCDC91         | C/G | 0.032  | 6.7x10-17 | C | G | -0.023 | 6.1x10-01 | 0.006  | 8.6x10-01 | G | C | 0.014  | 6.9x10-01 | -0.035 | 3.7x10-01 | C | -0.018 | 5.3x10-01 | C | 0.018  | 4.8x10-01 |
| rs2066807  | 12 | 55026949  | STAT2          | C/G | -0.054 | 1.0x10-13 | C | G | 0.095  | 2.8x10-01 | -0.108 | 8.1x10-02 | G | C | 0.018  | 8.3x10-01 | -0.017 | 8.3x10-01 | C | 0.034  | 5.7x10-01 | C | -0.062 | 2.1x10-01 |
| rs1351394  | 12 | 64638093  | HMG2A          | T/C | 0.06   | 1.7x10-65 | C | T | 0.149  | 5.5x10-04 | -0.151 | 9.8x10-07 | T | C | -0.128 | 2.6x10-04 | 0.134  | 2.4x10-04 | T | -0.136 | 5.3x10-07 | T | 0.144  | 1.0x10-09 |
| rs10748128 | 12 | 68113925  | FRS2           | T/G | 0.038  | 2.1x10-20 | G | T | -0.107 | 1.8x10-02 | 0.023  | 4.7x10-01 | T | G | -0.004 | 9.2x10-01 | -0.018 | 6.7x10-01 | T | 0.046  | 1.3x10-01 | T | -0.022 | 4.0x10-01 |
| rs11107116 | 12 | 92502635  | SOCS2          | T/G | 0.052  | 1.4x10-34 | G | T | 0.006  | 9.1x10-01 | 0.034  | 3.5x10-01 | T | G | -0.016 | 6.9x10-01 | 0.007  | 8.6x10-01 | T | -0.012 | 7.0x10-01 | T | -0.016 | 5.5x10-01 |
| rs7971536  | 12 | 100897919 | CCDC53/GNPTAB  | A/T | -0.028 | 8.2x10-14 | A | T | -0.013 | 7.7x10-01 | 0.025  | 4.3x10-01 | T | A | -0.008 | 8.2x10-01 | 0.004  | 9.1x10-01 | A | 0.000  | 9.9x10-01 | A | 0.013  | 5.8x10-01 |
| rs11830103 | 12 | 122389499 | SBNO1          | A/G | -0.035 | 3.9x10-15 | A | G | -0.003 | 9.6x10-01 | 0.000  | 9.9x10-01 | G | A | -0.057 | 1.7x10-01 | 0.073  | 9.4x10-02 | G | 0.035  | 2.9x10-01 | A | -0.032 | 2.7x10-01 |
| rs7332115  | 13 | 32045548  | PDS5B/BRCA2    | T/G | -0.023 | 5.5x10-10 | G | T | -0.099 | 2.6x10-02 | 0.033  | 2.9x10-01 | T | G | -0.042 | 2.3x10-01 | 0.056  | 1.2x10-01 | T | 0.012  | 6.6x10-01 | G | 0.005  | 8.3x10-01 |
| rs3118905  | 13 | 50003335  | DLEU7          | A/G | -0.056 | 1.1x10-45 | A | G | -0.009 | 8.4x10-01 | 0.014  | 6.8x10-01 | G | A | -0.033 | 3.8x10-01 | 0.029  | 4.6x10-01 | G | 0.017  | 5.6x10-01 | G | -0.005 | 8.5x10-01 |
| rs7319045  | 13 | 90822575  | GPC5           | A/G | 0.025  | 1.2x10-11 | A | G | -0.046 | 3.0x10-01 | 0.059  | 6.2x10-02 | G | A | -0.001 | 9.8x10-01 | -0.036 | 3.4x10-01 | A | -0.018 | 5.3x10-01 | A | 0.049  | 4.1x10-02 |
| rs1950500  | 14 | 23900690  | NFATC4         | T/C | 0.034  | 2.2x10-18 | C | T | -0.066 | 1.5x10-01 | 0.008  | 8.0x10-01 | T | C | -0.007 | 8.6x10-01 | -0.022 | 5.8x10-01 | T | 0.023  | 4.4x10-01 | T | -0.014 | 5.9x10-01 |
| rs2093210  | 14 | 60027032  | SIX6           | T/C | -0.032 | 6.2x10-17 | C | T | 0.027  | 5.5x10-01 | -0.036 | 2.6x10-01 | T | C | -0.017 | 6.7x10-01 | -0.057 | 1.7x10-01 | T | -0.021 | 4.8x10-01 | T | 0.001  | 9.6x10-01 |
| rs1570106  | 14 | 67882868  | RAD51L1        | T/C | -0.026 | 8.1x10-09 | C | T | 0.136  | 1.2x10-02 | -0.119 | 2.2x10-03 | T | C | -0.126 | 3.5x10-03 | 0.164  | 2.4x10-04 | T | -0.130 | 1.2x10-04 | T | 0.139  | 2.3x10-06 |
| rs862034   | 14 | 74060499  | LTBP2          | A/G | -0.028 | 7.3x10-14 | A | G | 0.001  | 9.7x10-01 | -0.020 | 5.2x10-01 | G | A | -0.034 | 3.5x10-01 | 0.010  | 7.9x10-01 | A | 0.021  | 4.6x10-01 | A | -0.016 | 5.0x10-01 |
| rs7155279  | 14 | 91555634  | TRIP11         | T/G | -0.024 | 1.4x10-10 | G | T | -0.033 | 4.6x10-01 | -0.028 | 3.9x10-01 | T | G | 0.010  | 8.0x10-01 | -0.037 | 3.4x10-01 | T | 0.019  | 5.1x10-01 | T | 0.001  | 9.6x10-01 |
| rs16964211 | 15 | 49317787  | CYP19A1        | A/G | -0.05  | 1.7x10-09 | A | G | -0.122 | 2.4x10-01 | -0.035 | 6.3x10-01 | G | A | -0.077 | 2.6x10-01 | -0.028 | 7.0x10-01 | G | 0.017  | 7.7x10-01 | A | -0.003 | 9.6x10-01 |
| rs7178424  | 15 | 60167551  | C2CD4A         | T/C | -0.021 | 5.6x10-09 | C | T | 0.010  | 8.2x10-01 | 0.010  | 7.5x10-01 | T | C | 0.034  | 3.5x10-01 | -0.011 | 7.8x10-01 | C | 0.016  | 5.7x10-01 | T | -0.010 | 6.7x10-01 |
| rs10152591 | 15 | 67835211  | TLE3           | A/C | 0.041  | 2.7x10-10 | A | C | 0.015  | 8.2x10-01 | 0.019  | 6.9x10-01 | C | A | 0.060  | 4.3x10-01 | -0.001 | 9.9x10-01 | C | -0.018 | 7.2x10-01 | A | 0.014  | 7.3x10-01 |
| rs12902421 | 15 | 69948457  | MYO9A          | T/C | -0.062 | 2.9x10-08 | C | T | -0.001 | 1.0x10+00 | 0.100  | 2.6x10-01 | T | C | 0.054  | 7.0x10-01 | -0.029 | 8.4x10-01 | T | 0.024  | 8.0x10-01 | T | -0.081 | 2.9x10-01 |





|                            |                 | Pathway P value thresholds |         |                    |         |                    |         |
|----------------------------|-----------------|----------------------------|---------|--------------------|---------|--------------------|---------|
| P-value criterion for SNPs | Number of genes | P<0.05                     |         | P<0.01             |         | P<0.001            |         |
|                            |                 | Number of pathways         | P value | Number of pathways | P value | Number of pathways | P value |
| 0.0001                     | 118             | 70                         | 0.017   | 19                 | 0.049   | 4                  | 0.053   |
| 0.0005                     | 262             | 49                         | 0.174   | 16                 | 0.089   | 2                  | 0.159   |
| 0.001                      | 410             | 73                         | 0.063   | 16                 | 0.110   | 3                  | 0.086   |
| 0.005                      | 1358            | 157                        | 0.004   | 50                 | 0.002   | 11                 | 0.004   |

**(A)** Number of significantly over-represented pathways in the ‘age at first tooth’ GWAS.

|                            |                 | Pathway P value thresholds |         |                    |         |                    |         |
|----------------------------|-----------------|----------------------------|---------|--------------------|---------|--------------------|---------|
| P-value criterion for SNPs | Number of genes | P<0.05                     |         | P<0.01             |         | P<0.001            |         |
|                            |                 | Number of pathways         | P value | Number of pathways | P value | Number of pathways | P value |
| 0.0001                     | 90              | 25                         | 0.196   | 6                  | 0.258   | 1                  | 0.255   |
| 0.0005                     | 254             | 26                         | 0.546   | 5                  | 0.542   | 1                  | 0.355   |
| 0.001                      | 408             | 56                         | 0.146   | 13                 | 0.167   | 0                  | 1.000   |
| 0.005                      | 1272            | 60                         | 0.273   | 17                 | 0.130   | 0                  | 1.000   |

**(B)** Number of significantly over-represented pathways in the ‘number of teeth’ GWAS.

**Supplementary Table 6:** Summary statistics from ALIGATOR analyses for (a) the ‘time to first tooth’ GWAS and (b) the ‘number of teeth’ GWAS. The first column gives the P-value criteria (left-most column) GWAS threshold. The second column displays the number of genes with one or more SNPs with a p-value less than the labelled threshold. Third column displays number of pathways with a p-value less than the labelled threshold, the adjacent P value indicates whether this number is significantly greater than that expected by chance, similarly for the subsequent columns.
